# Supplementary material
Source: ML conference proceedings conference paper supplement (https://openreview.net/forum?id=mfJepDyIUcQ)
Supplement: supplementary_material [file attachment]

## Sheet: Sheet1
	V	theta	x	y	dx	dy
0	2.36438	-0.170428	0	0	0.233012	-0.0401009
0.1	0.0867744	-3.03255	0.233012	-0.0401009	-0.0086259	-0.000944347
0.2	3.75923	1.58239	0.224386	-0.0410452	-0.00435889	0.375897
0.3	0.881032	-2.03445	0.220028	0.334852	-0.0394018	-0.0788015
0.4	0.348487	-2.70367	0.180626	0.256051	-0.0315602	-0.0147779
0.5	1.13665	-1.71323	0.149065	0.241273	-0.0161353	-0.112514
0.6	0.625609	-2.35543	0.13293	0.128759	-0.0442034	-0.0442711
0.7	4.10316	2.01458	0.0887268	0.0844875	-0.176175	0.370569
0.8	2.33135	-0.211933	-0.0874479	0.455056	0.227919	-0.04904
0.9	4.46255	2.46621	0.140471	0.406016	-0.348287	0.278997
1	1.12716	-1.72516	-0.207816	0.685013	-0.0173298	-0.111376
1.1	3.98092	1.86098	-0.225146	0.573637	-0.113907	0.381448
1.2	3.80627	1.6415	-0.339053	0.955085	-0.0268898	0.379676
1.3	3.36687	1.08934	-0.365942	1.33476	0.15591	0.298412
1.4	0.203641	-2.88569	-0.210032	1.63317	-0.019701	-0.00515454
1.5	3.46701	1.21518	-0.229733	1.62802	0.12071	0.325009
1.6	3.87838	1.73212	-0.109023	1.95303	-0.0622959	0.382802
1.7	2.78739	0.361147	-0.171319	2.33583	0.260758	0.0984916
1.8	0.112589	-3.00011	0.0894392	2.43432	-0.0111464	-0.00158763
1.9	3.4559	1.20122	0.0782929	2.43273	0.124835	0.322255
2	4.8377	2.93765	0.203128	2.75499	-0.473744	0.097981
2.1	3.95485	1.82822	-0.270616	2.85297	-0.100685	0.382454
2.2	1.42851	-1.34647	-0.371301	3.23542	0.0317767	-0.139272
2.3	3.86049	1.70964	-0.339525	3.09615	-0.0534289	0.382334
2.4	0.60911	-2.37616	-0.392954	3.47849	-0.043922	-0.042202
2.5	1.7176	-0.983192	-0.436876	3.43628	0.0952185	-0.142951
2.6	3.66565	1.4648	-0.341657	3.29333	0.0387835	0.364507
2.7	1.45044	-1.31892	-0.302874	3.65784	0.0361482	-0.140467
2.8	4.35354	2.32923	-0.266725	3.51737	-0.299429	0.31603
2.9	3.21003	0.892251	-0.566155	3.8334	0.201481	0.249897
3	2.79758	0.373954	-0.364674	4.0833	0.260424	0.102195
3.1	4.6111	2.65289	-0.104249	4.18549	-0.407133	0.216483
3.2	4.52745	2.54777	-0.511383	4.40198	-0.375239	0.253326
3.3	1.6785	-1.03232	-0.886621	4.6553	0.0860783	-0.144098
3.4	2.24289	-0.3231	-0.800543	4.51121	0.212683	-0.0712133
3.5	3.76594	1.59083	-0.58786	4.43999	-0.00754265	0.376518
3.6	2.29339	-0.259631	-0.595403	4.81651	0.221653	-0.0588769
3.7	1.1392	-1.71004	-0.37375	4.75763	-0.015811	-0.112817
3.8	0.169274	-2.92888	-0.389561	4.64482	-0.0165459	-0.00357365
3.9	2.98997	0.615716	-0.406107	4.64124	0.244089	0.172684
4	4.6792	2.73846	-0.162017	4.81393	-0.430411	0.183564
4.1	2.70947	0.263224	-0.592428	4.99749	0.261614	0.070499
4.2	0.430329	-2.60083	-0.330814	5.06799	-0.0368927	-0.0221531
4.3	2.92431	0.533207	-0.367707	5.04584	0.251836	0.148642
4.4	3.84223	1.68669	-0.115871	5.19448	-0.0444295	0.381645
4.5	1.62553	-1.0989	-0.1603	5.57612	0.0738932	-0.144787
4.6	2.78022	0.352135	-0.0864068	5.43134	0.260962	0.0958904
4.7	3.38967	1.118	0.174555	5.52723	0.148293	0.304808
4.8	4.03273	1.92609	0.322848	5.83204	-0.140285	0.378087
4.9	2.76545	0.333579	0.182563	6.21012	0.261301	0.0905484
5	0.733158	-2.22028	0.443865	6.30067	-0.0443395	-0.0583885
5.1	3.62947	1.41934	0.399525	6.24228	0.0547623	0.358792
5.2	2.45013	-0.0626645	0.454287	6.60107	0.244532	-0.0153436
5.3	0.258917	-2.81623	0.69882	6.58573	-0.0245333	-0.00827642
5.4	3.45646	1.20192	0.674287	6.57745	0.124629	0.322395
5.5	1.56753	-1.17178	0.798916	6.89985	0.0609003	-0.144439
5.6	2.79884	0.375538	0.859816	6.75541	0.260379	0.102654
5.7	2.67352	0.218057	1.1202	6.85806	0.261021	0.0578371
5.8	2.02906	-0.591803	1.38122	6.9159	0.168399	-0.113193
5.9	2.86906	0.463769	1.54962	6.80271	0.256601	0.128339
6	2.06777	-0.54315	1.80622	6.93105	0.177019	-0.10687
6.1	1.59041	-1.14303	1.98324	6.82418	0.0659767	-0.14471
6.2	4.92468	3.04694	2.04921	6.67947	-0.490264	0.0465421
6.3	1.88986	-0.766725	1.55895	6.72601	0.136105	-0.131115
6.4	0.791407	-2.14708	1.69505	6.5949	-0.0431248	-0.0663589
6.5	3.64136	1.43428	1.65193	6.52854	0.0495567	0.360748
6.6	0.518388	-2.49017	1.70149	6.88929	-0.0412233	-0.0314309
6.7	3.70531	1.51463	1.66026	6.85785	0.0207998	0.369946
6.8	0.361836	-2.6869	1.68106	7.2278	-0.0325071	-0.0158915
6.9	2.49166	-0.0104833	1.64855	7.21191	0.249152	-0.00261203
7	1.90687	-0.74535	1.89771	7.2093	0.140126	-0.129329
7.1	3.21334	0.896413	2.03783	7.07997	0.200646	0.250992
7.2	4.64066	2.69003	2.23848	7.33096	-0.417552	0.202503
7.3	4.26905	2.22306	1.82093	7.53346	-0.259124	0.339268
7.4	0.201289	-2.88865	1.5618	7.87273	-0.0194884	-0.00503741
7.5	3.35707	1.07703	1.54231	7.86769	0.159108	0.295607
7.6	2.18748	-0.392719	1.70142	8.1633	0.202096	-0.0837153
7.7	2.78145	0.353685	1.90352	8.07959	0.260929	0.0963375
7.8	1.31934	-1.48366	2.16445	8.17592	0.0114814	-0.131433
7.9	0.67608	-2.29201	2.17593	8.04449	-0.0446411	-0.0507741
8	0.285102	-2.78332	2.13129	7.99372	-0.0266999	-0.0099972
8.1	3.1896	0.86658	2.10459	7.98372	0.206507	0.243086
8.2	2.55409	0.0679769	2.31109	8.2268	0.25482	0.0173486
8.3	3.92712	1.79337	2.56591	8.24415	-0.0866876	0.383025
8.4	1.41253	-1.36656	2.47923	8.62718	0.0286492	-0.138317
8.5	2.24617	-0.318975	2.50788	8.48886	0.213286	-0.0704384
8.6	1.48917	-1.27025	2.72116	8.41842	0.0440857	-0.142242
8.7	2.346	-0.193518	2.76525	8.27618	0.230221	-0.0451165
8.8	2.58591	0.107961	2.99547	8.23106	0.257086	0.0278636
8.9	0.73129	-2.22263	3.25255	8.25893	-0.0443632	-0.0581357
9	0.790471	-2.14826	3.20819	8.20079	-0.0431517	-0.0662297
9.1	4.91342	3.03279	3.16504	8.13456	-0.488436	0.0533545
9.2	0.290145	-2.77699	2.6766	8.18792	-0.0271072	-0.0103461
9.3	3.1535	0.821208	2.6495	8.17757	0.21486	0.230826
9.4	1.68312	-1.02652	2.86436	8.4084	0.0871524	-0.143991
9.5	4.40783	2.39745	2.95151	8.26441	-0.324271	0.29856
9.6	0.0204497	-3.11589	2.62724	8.56297	-0.00204429	-5.25454e-05
9.7	2.63149	0.165236	2.62519	8.56291	0.259565	0.0432841
9.8	2.12696	-0.468775	2.88476	8.6062	0.189751	-0.0960947
9.9	2.22913	-0.340379	3.07451	8.5101	0.210124	-0.0744183
0	2.36438	2.35719	0	0	-0.167353	0.16702
0.1	0.0867744	-1.14417	-0.167353	0.16702	0.00359072	-0.00789966
0.2	3.75923	-1.42481	-0.163762	0.159121	0.0546843	-0.371924
0.3	0.881032	1.109	-0.109078	-0.212803	0.0392553	0.0788746
0.4	0.348487	-2.69441	-0.0698226	-0.133929	-0.031422	-0.0150694
0.5	1.13665	-1.90638	-0.101245	-0.148998	-0.0374318	-0.107325
0.6	0.625609	0.182706	-0.138676	-0.256323	0.0615196	0.0113668
0.7	4.10316	-2.06242	-0.0771569	-0.244956	-0.193692	-0.361721
0.8	2.33135	2.32454	-0.270849	-0.606678	-0.159552	0.169985
0.9	4.46255	-1.61046	-0.430401	-0.436692	-0.0176957	-0.445904
1	1.12716	2.1546	-0.448096	-0.882596	-0.0621293	0.0940476
1.1	3.98092	0.362284	-0.510226	-0.788548	0.372252	0.141088
1.2	3.80627	-0.899673	-0.137973	-0.64746	0.236699	-0.298078
1.3	3.36687	-1.6814	0.0987254	-0.945538	-0.037163	-0.334629
1.4	0.203641	0.927411	0.0615624	-1.28017	0.0122166	0.0162927
1.5	3.46701	3.0955	0.0737789	-1.26387	-0.346333	0.0159737
1.6	3.87838	-0.725367	-0.272554	-1.2479	0.290202	-0.257296
1.7	2.78739	-2.21269	0.0176478	-1.5052	-0.166885	-0.223259
1.8	0.112589	2.96339	-0.149238	-1.72846	-0.0110806	0.00199576
1.9	3.4559	-1.76849	-0.160318	-1.72646	-0.067878	-0.338858
2	4.8377	0.675593	-0.228196	-2.06532	0.377504	0.302531
2.1	3.95485	0.382769	0.149307	-1.76279	0.366865	0.14771
2.2	1.42851	1.46668	0.516173	-1.61508	0.0148456	0.142078
2.3	3.86049	0.72622	0.531018	-1.473	0.288645	0.256355
2.4	0.60911	-1.33506	0.819663	-1.21665	0.0142263	-0.0592263
2.5	1.7176	3.13151	0.833889	-1.27587	-0.171751	0.00173187
2.6	3.66565	-3.13419	0.662138	-1.27414	-0.366555	-0.00271241
2.7	1.45044	0.622969	0.295583	-1.27685	0.117797	0.0846257
2.8	4.35354	-2.13767	0.413381	-1.19223	-0.233784	-0.367258
2.9	3.21003	1.43776	0.179596	-1.55948	0.0425796	0.318167
3	2.79758	1.94848	0.222176	-1.24132	-0.103166	0.260041
3.1	4.6111	-2.01773	0.11901	-0.981276	-0.199293	-0.415818
3.2	4.52745	-1.06898	-0.0802836	-1.39709	0.21778	-0.396926
3.3	1.6785	-2.38105	0.137496	-1.79402	-0.121601	-0.115702
3.4	2.24289	-0.260192	0.0158952	-1.90972	0.216739	-0.0577019
3.5	3.76594	0.631826	0.232634	-1.96742	0.303893	0.222424
3.6	2.29339	-1.98772	0.536527	-1.745	-0.0928716	-0.209693
3.7	1.1392	1.11021	0.443655	-1.95469	0.0506343	0.102048
3.8	0.169274	-2.76898	0.49429	-1.85265	-0.0157659	-0.0061624
3.9	2.98997	1.80193	0.478524	-1.85881	-0.0684935	0.291046
4	4.6792	1.02837	0.41003	-1.56776	0.241546	0.400755
4.1	2.70947	-1.8779	0.651577	-1.16701	-0.0819076	-0.25827
4.2	0.430329	-2.35093	0.569669	-1.42528	-0.0302682	-0.0305887
4.3	2.92431	1.68512	0.539401	-1.45587	-0.0333591	0.290522
4.4	3.84223	-1.83307	0.506042	-1.16534	-0.0996186	-0.371084
4.5	1.62553	-1.08771	0.406423	-1.53643	0.0755083	-0.143951
4.6	2.78022	-2.67483	0.481931	-1.68038	-0.248282	-0.125108
4.7	3.38967	-1.4536	0.233649	-1.80549	0.0396339	-0.336642
4.8	4.03273	-0.245741	0.273283	-2.14213	0.391158	-0.0981065
4.9	2.76545	-2.49949	0.664441	-2.24023	-0.221468	-0.165618
5	0.733158	-2.41349	0.442973	-2.40585	-0.0547257	-0.0487884
5.1	3.62947	-2.04997	0.388247	-2.45464	-0.167336	-0.32207
5.2	2.45013	-1.3006	0.220911	-2.77671	0.0653984	-0.236124
5.3	0.258917	-2.04108	0.286309	-3.01284	-0.0117325	-0.0230809
5.4	3.45646	-2.32805	0.274577	-3.03592	-0.237434	-0.251189
5.5	1.56753	1.1818	0.0371428	-3.28711	0.05945	0.145042
5.6	2.79884	-1.25882	0.0965928	-3.14206	0.0859087	-0.266374
5.7	2.67352	2.09336	0.182502	-3.40844	-0.133436	0.231673
5.8	2.02906	2.85484	0.0490656	-3.17677	-0.194621	0.0573902
5.9	2.86906	1.90318	-0.145555	-3.11937	-0.0936164	0.271202
6	2.06777	-0.134509	-0.239171	-2.84817	0.20491	-0.0277297
6.1	1.59041	2.96613	-0.0342616	-2.8759	-0.156599	0.0277628
6.2	4.92468	-2.35686	-0.19086	-2.84814	-0.348461	-0.347994
6.3	1.88986	2.45857	-0.539321	-3.19613	-0.14659	0.119277
6.4	0.791407	2.99214	-0.685911	-3.07686	-0.0782584	0.011784
6.5	3.64136	-1.99351	-0.76417	-3.06507	-0.149383	-0.332084
6.6	0.518388	2.56751	-0.913553	-3.39716	-0.0435286	0.0281517
6.7	3.70531	0.0405985	-0.957081	-3.369	0.370225	0.0150389
6.8	0.361836	-2.07126	-0.586856	-3.35397	-0.017362	-0.031746
6.9	2.49166	0.92201	-0.604218	-3.38571	0.150551	0.19854
7	1.90687	-1.79682	-0.453667	-3.18717	-0.0427344	-0.185837
7.1	3.21334	1.19886	-0.496401	-3.37301	0.116778	0.299364
7.2	4.64066	1.03213	-0.379623	-3.07365	0.23806	0.398352
7.3	4.26905	0.151247	-0.141563	-2.67529	0.422032	0.0643222
7.4	0.201289	2.6543	0.280469	-2.61097	-0.0177859	0.00942505
7.5	3.35707	2.3077	0.262683	-2.60155	-0.225595	0.248608
7.6	2.18748	0.139348	0.0370877	-2.35294	0.216628	0.0303836
7.7	2.78145	-2.75702	0.253716	-2.32255	-0.257829	-0.104351
7.8	1.31934	1.00742	-0.00411306	-2.42691	0.0704584	0.111544
7.9	0.67608	-0.209618	0.0663454	-2.31536	0.0661281	-0.0140683
8	0.285102	-2.81321	0.132473	-2.32943	-0.0269867	-0.009195
8.1	3.1896	-1.23882	0.105487	-2.33862	0.103954	-0.301545
8.2	2.55409	2.6322	0.209441	-2.64017	-0.222983	0.124549
8.3	3.92712	-0.747638	-0.0135428	-2.51562	0.287975	-0.267008
8.4	1.41253	-1.57141	0.274432	-2.78263	-8.65829e-05	-0.141253
8.5	2.24617	1.38709	0.274345	-2.92388	0.0410315	0.220837
8.6	1.48917	1.31283	0.315377	-2.70304	0.0379903	0.143989
8.7	2.346	-1.77548	0.353367	-2.55905	-0.0476834	-0.229703
8.8	2.58591	1.12427	0.305684	-2.78876	0.111669	0.233237
8.9	0.73129	0.463308	0.417353	-2.55552	0.0654197	0.032682
9	0.790471	1.36733	0.482772	-2.52284	0.0159729	0.0774164
9.1	4.91342	0.861635	0.498745	-2.44542	0.31996	0.372883
9.2	0.290145	1.90313	0.818706	-2.07254	-0.00946588	0.027427
9.3	3.1535	1.35704	0.80924	-2.04511	0.0668969	0.308172
9.4	1.68312	-2.8693	0.876137	-1.73694	-0.162111	-0.0452656
9.5	4.40783	-2.89769	0.714025	-1.7822	-0.427737	-0.106447
9.6	0.0204497	1.09986	0.286288	-1.88865	0.000927842	0.00182236
9.7	2.63149	-0.294801	0.287216	-1.88683	0.251797	-0.0764579
9.8	2.12696	-2.68035	0.539013	-1.96329	-0.190469	-0.0946637
9.9	2.22913	-0.0892286	0.348544	-2.05795	0.222027	-0.0198592
0	2.72516	1.45642	0	0	0.0311026	0.270736
0.1	2.41861	-0.508341	0.0311026	0.270736	0.211278	-0.117721
0.2	4.85902	2.02659	0.242381	0.153015	-0.213881	0.436298
0.3	1.84037	-2.6822	0.0284996	0.589313	-0.164956	-0.0816025
0.4	2.32555	-2.622	-0.136457	0.507711	-0.201864	-0.115469
0.5	0.303374	-0.901883	-0.33832	0.392242	0.0188132	-0.0237995
0.6	4.87602	-1.22546	-0.319507	0.368442	0.16506	-0.458815
0.7	0.89505	-3.03537	-0.154447	-0.0903725	-0.0890006	-0.0094893
0.8	2.61865	0.388876	-0.243448	-0.0998618	0.242313	0.0992859
0.9	4.10943	-0.299978	-0.00113465	-0.00057594	0.392592	-0.121433
1	0.98979	-2.38298	0.391457	-0.122009	-0.0718381	-0.0680892
1.1	4.19971	1.90815	0.319619	-0.190098	-0.139006	0.396299
1.2	2.99933	2.70081	0.180613	0.206201	-0.271265	0.127965
1.3	0.186974	0.411049	-0.0906527	0.334166	0.01714	0.00747095
1.4	3.43678	2.2177	-0.0735127	0.341637	-0.207141	0.27424
1.5	3.53934	-1.91172	-0.280653	0.615877	-0.118341	-0.333564
1.6	2.06147	-2.96158	-0.398994	0.282313	-0.202816	-0.0369096
1.7	3.56067	0.424632	-0.60181	0.245404	0.324444	0.146694
1.8	0.48056	-1.71682	-0.277365	0.392098	-0.00699254	-0.0475445
1.9	4.32572	2.39219	-0.284358	0.344553	-0.316684	0.294669
2	3.16518	1.37048	-0.601041	0.639223	0.06298	0.310189
2.1	2.56753	0.533542	-0.538061	0.949412	0.221067	0.130581
2.2	1.63447	2.29165	-0.316994	1.07999	-0.107879	0.122789
2.3	0.940028	2.03764	-0.424873	1.20278	-0.0423077	0.083944
2.4	3.77352	-2.56032	-0.467181	1.28673	-0.315378	-0.207198
2.5	2.99682	1.12889	-0.782559	1.07953	0.128163	0.270895
2.6	2.12114	-0.880468	-0.654396	1.35042	0.135072	-0.163548
2.7	4.42896	-0.623756	-0.519324	1.18687	0.359495	-0.25869
2.8	4.79042	0.848528	-0.159829	0.928184	0.316689	0.359429
2.9	2.20029	1.27969	0.156859	1.28761	0.063151	0.210772
3	2.65072	-2.54993	0.22001	1.49838	-0.220014	-0.147842
3.1	1.73697	2.4457	-3.4785e-06	1.35054	-0.133309	0.111352
3.2	4.5359	-1.20722	-0.133313	1.4619	0.161307	-0.423939
3.3	0.362726	0.629161	0.0279945	1.03796	0.0293272	0.0213452
3.4	0.603238	0.117392	0.0573217	1.0593	0.0599086	0.00706527
3.5	4.24815	-1.59286	0.11723	1.06637	-0.00937309	-0.424711
3.6	0.960567	1.66476	0.107857	0.641656	-0.00901272	0.095633
3.7	2.85435	1.99676	0.0988444	0.737289	-0.117942	0.259929
3.8	2.21787	2.29604	-0.0190978	0.997218	-0.147115	0.165972
3.9	0.47003	-1.01728	-0.166213	1.16319	0.0247087	-0.0399845
4	3.90899	1.1179	-0.141504	1.12321	0.171047	0.35149
4.1	2.90333	2.15758	0.0295424	1.4747	-0.160754	0.241767
4.2	0.656263	1.15962	-0.131212	1.71646	0.0262298	0.0601565
4.3	0.0248804	1.62513	-0.104982	1.77662	-0.000135108	0.00248437
4.4	3.86223	1.29958	-0.105117	1.7791	0.10347	0.372106
4.5	3.88189	-0.760692	-0.00164749	2.15121	0.281188	-0.267626
4.6	2.00023	0.752307	0.27954	1.88358	0.14604	0.136681
4.7	3.71302	-1.96471	0.42558	2.02026	-0.142507	-0.342866
4.8	2.35258	2.75505	0.283073	1.6774	-0.2179	0.0886893
4.9	2.26084	-2.60082	0.0651725	1.76609	-0.193824	-0.116389
5	0.720123	-2.90438	-0.128652	1.6497	-0.0699957	-0.0169224
5.1	1.00141	-0.685019	-0.198647	1.63278	0.07755	-0.0633581
5.2	3.14257	1.97532	-0.121097	1.56942	-0.123685	0.288894
5.3	2.05111	1.33323	-0.244782	1.85831	0.0482708	0.19935
5.4	1.72127	-1.21279	-0.196511	2.05766	0.060315	-0.161214
5.5	0.197518	-3.08656	-0.136196	1.89645	-0.0197219	-0.00108648
5.6	3.05305	-0.492504	-0.155918	1.89536	0.26902	-0.144358
5.7	0.993109	-1.88927	0.113102	1.751	-0.0310964	-0.0943168
5.8	3.23486	-2.01957	0.0820054	1.65669	-0.140348	-0.291455
5.9	3.20573	0.460194	-0.0583423	1.36523	0.287222	0.142373
6	1.40838	-2.29521	0.22888	1.5076	-0.0933328	-0.105471
6.1	1.31153	-0.98425	0.135547	1.40213	0.0725915	-0.109232
6.2	4.26432	0.48211	0.208139	1.2929	0.377827	0.197715
6.3	0.360516	1.57413	0.585965	1.49062	-0.000120308	0.0360514
6.4	0.978835	1.59731	0.585845	1.52667	-0.00259501	0.0978491
6.5	2.85579	2.10703	0.58325	1.62452	-0.145902	0.245496
6.6	0.996287	-3.06608	0.437348	1.87001	-0.0993448	-0.00751595
6.7	1.129	-1.31958	0.338003	1.8625	0.028065	-0.109356
6.8	0.455714	-0.407004	0.366068	1.75314	0.0418487	-0.0180399
6.9	4.21477	-0.699362	0.407917	1.7351	0.322536	-0.271317
7	4.58026	2.2841	0.730453	1.46378	-0.299703	0.346361
7.1	3.90118	1.63148	0.43075	1.81014	-0.0236586	0.3894
7.2	2.47069	1.94322	0.407092	2.19954	-0.0899009	0.230132
7.3	3.58902	-1.29467	0.317191	2.42968	0.0978471	-0.345307
7.4	0.0604784	2.995	0.415038	2.08437	-0.00598297	0.000883417
7.5	2.69076	1.31133	0.409055	2.08525	0.0690357	0.260069
7.6	4.90324	2.40698	0.47809	2.34532	-0.363865	0.328665
7.7	2.97729	0.496761	0.114226	2.67399	0.261743	0.141892
7.8	3.18869	2.20473	0.375968	2.81588	-0.188872	0.256913
7.9	1.12208	-0.333476	0.187096	3.07279	0.106026	-0.0367289
8	3.46635	2.25487	0.293122	3.03606	-0.219059	0.268643
8.1	4.67479	0.456629	0.0740631	3.30471	0.419583	0.206123
8.2	4.52788	0.151836	0.493646	3.51083	0.447578	0.0684858
8.3	0.431495	-0.220806	0.941224	3.57931	0.0421019	-0.00945045
8.4	1.20039	0.564429	0.983326	3.56986	0.10142	0.0642128
8.5	3.01428	-2.25708	1.08475	3.63408	-0.191004	-0.233187
8.6	0.635226	2.23279	0.893742	3.40089	-0.0390466	0.0501047
8.7	2.07359	2.68363	0.854696	3.45099	-0.185991	0.0916786
8.8	2.36605	2.71593	0.668704	3.54267	-0.215492	0.097699
8.9	0.108554	-2.9744	0.453212	3.64037	-0.010704	-0.00180645
9	4.96033	1.47516	0.442509	3.63857	0.0473652	0.493767
9.1	0.24765	0.0146829	0.489874	4.13233	0.0247623	0.000363608
9.2	4.79762	2.89411	0.514636	4.1327	-0.465145	0.117525
9.3	1.45286	0.185754	0.0494914	4.25022	0.142787	0.0268324
9.4	4.57997	-0.671873	0.192278	4.27705	0.358455	-0.285081
9.5	4.33577	-2.03646	0.550733	3.99197	-0.194681	-0.387412
9.6	1.09458	-1.54038	0.356052	3.60456	0.00332825	-0.109407
9.7	4.5722	2.48404	0.35938	3.49515	-0.361884	0.279446
9.8	2.05593	-2.56558	-0.00250389	3.7746	-0.172416	-0.111984
0	1.07391	2.63129	0	0	-0.0937087	0.0524539
0.1	0.543605	1.60553	-0.0937087	0.0524539	-0.00188778	0.0543277
0.2	0.0883991	-0.77414	-0.0955964	0.106782	0.00632073	-0.00617999
0.3	1.87507	-1.88886	-0.0892757	0.100602	-0.0586382	-0.178103
0.4	0.706778	1.26742	-0.147914	-0.077501	0.0211145	0.0674502
0.5	2.90596	-0.963744	-0.126799	-0.0100507	0.16577	-0.238676
0.6	0.830222	1.06937	0.0389708	-0.248727	0.039907	0.0728019
0.7	1.1665	-0.208719	0.0788778	-0.175925	0.114119	-0.0241707
0.8	2.49379	0.665698	0.192996	-0.200096	0.196133	0.154019
0.9	3.04679	0.236996	0.38913	-0.0460771	0.296163	0.0715336
1	3.28382	2.84417	0.685293	0.0254565	-0.313964	0.0962362
1.1	4.74692	-1.5026	0.371329	0.121693	0.0323477	-0.473588
1.2	2.29019	-2.46577	0.403676	-0.351896	-0.178679	-0.14326
1.3	0.572053	1.28778	0.224997	-0.495155	0.0159747	0.0549296
1.4	2.89703	1.38469	0.240972	-0.440226	0.0536046	0.284701
1.5	1.87914	3.0997	0.294576	-0.155525	-0.187749	0.00787033
1.6	0.687881	-1.6438	0.106827	-0.147654	-0.00501766	-0.0686048
1.7	2.69593	-1.42871	0.10181	-0.216259	0.0381766	-0.266876
1.8	2.75969	-0.350555	0.139986	-0.483135	0.259185	-0.094773
1.9	4.21667	0.414294	0.399171	-0.577908	0.385994	0.169739
2	3.65455	-1.86462	0.785166	-0.408169	-0.10584	-0.349794
2.1	0.554387	-0.162503	0.679326	-0.757962	0.0547083	-0.00896935
2.2	2.31163	-1.28978	0.734034	-0.766932	0.0641097	-0.222096
2.3	3.37072	-0.448502	0.798144	-0.989027	0.303735	-0.14616
2.4	4.79778	-2.69588	1.10188	-1.13519	-0.432906	-0.206833
2.5	2.1785	0.302491	0.668973	-1.34202	0.207959	0.0648971
2.6	3.1795	2.71643	0.876932	-1.27712	-0.289644	0.131143
2.7	1.31832	-2.80424	0.587288	-1.14598	-0.124402	-0.043635
2.8	0.946682	-0.9002	0.462886	-1.18961	0.0588318	-0.0741679
2.9	3.9654	2.11394	0.521718	-1.26378	-0.204945	0.339473
3	1.9959	-1.94757	0.316773	-0.92431	-0.0734344	-0.185589
3.1	4.34712	-2.72224	0.243339	-1.1099	-0.397046	-0.177
3.2	3.41609	0.588584	-0.153708	-1.2869	0.284125	0.189656
3.3	4.78559	1.86173	0.130418	-1.09724	-0.137272	0.458448
3.4	0.107422	0.418907	-0.00685396	-0.638795	0.0098134	0.00436954
3.5	2.37053	0.382725	0.00295944	-0.634425	0.219902	0.0885272
3.6	0.063904	-0.686969	0.222861	-0.545898	0.00494088	-0.00405277
3.7	2.59696	1.88881	0.227802	-0.549951	-0.0812019	0.246674
3.8	1.05524	-0.328458	0.1466	-0.303277	0.0998826	-0.0340403
3.9	3.55089	2.15281	0.246483	-0.337317	-0.195195	0.296627
4	0.138652	-0.667631	0.0512883	-0.0406902	0.0108882	-0.00858434
4.1	1.69749	-2.30646	0.0621765	-0.0492745	-0.113914	-0.12585
4.2	3.7553	-0.615267	-0.0517378	-0.175124	0.306665	-0.216747
4.3	1.98754	2.36607	0.254928	-0.391872	-0.141922	0.139145
4.4	4.7989	1.17161	0.113006	-0.252727	0.186519	0.442159
4.5	1.24857	-0.696906	0.299524	0.189433	0.0957444	-0.0801393
4.6	0.761162	-2.00201	0.395269	0.109293	-0.0318143	-0.0691486
4.7	3.7678	-1.14348	0.363455	0.0401447	0.15615	-0.3429
4.8	4.15883	1.7487	0.519605	-0.302756	-0.0735964	0.40932
4.9	3.14668	1.68466	0.446008	0.106564	-0.0357509	0.312631
5	1.36262	-3.12533	0.410257	0.419195	-0.136244	-0.00221618
5.1	4.11752	2.23366	0.274013	0.416979	-0.253382	0.324557
5.2	4.46406	1.99901	0.0206313	0.741535	-0.18537	0.406099
5.3	1.79338	-2.28743	-0.164738	1.14763	-0.117798	-0.135224
5.4	4.14198	-0.295229	-0.282537	1.01241	0.396278	-0.120515
5.5	2.13752	2.04666	0.113742	0.891896	-0.0979205	0.190003
5.6	4.10013	2.47521	0.0158212	1.0819	-0.322296	0.253447
5.7	4.12349	-2.68775	-0.306475	1.33535	-0.370607	-0.180782
5.8	2.35782	-2.36841	-0.677082	1.15456	-0.168748	-0.164673
5.9	0.50428	0.950206	-0.84583	0.989891	0.0293247	0.041025
6	2.89083	-1.63725	-0.816505	1.03092	-0.0191952	-0.288445
6.1	3.91094	2.33885	-0.8357	0.742471	-0.271707	0.2813
6.2	3.90339	-0.827047	-1.10741	1.02377	0.26428	-0.287264
6.3	2.84823	2.05213	-0.843128	0.736506	-0.131863	0.25246
6.4	2.61221	2.18263	-0.974991	0.988966	-0.150036	0.213835
6.5	0.333477	0.972185	-1.12503	1.2028	0.0187913	0.0275492
6.6	4.60201	-0.52337	-1.10624	1.23035	0.398598	-0.230009
6.7	0.879561	-0.0732578	-0.707638	1.00034	0.0877202	-0.00643771
6.8	3.3944	-1.36474	-0.619918	0.993904	0.0694512	-0.332259
6.9	0.286965	2.76341	-0.550466	0.661644	-0.0266687	0.0105955
7	0.492228	-2.16123	-0.577135	0.67224	-0.0274035	-0.0408893
7.1	1.1735	-2.35718	-0.604539	0.631351	-0.0830609	-0.0828967
7.2	3.70449	0.900201	-0.687599	0.548454	0.230217	0.290229
7.3	1.27914	0.922752	-0.457383	0.838683	0.0772125	0.101981
7.4	3.48237	1.91199	-0.38017	0.940664	-0.116525	0.328163
7.5	0.308442	2.47629	-0.496696	1.26883	-0.0242661	0.01904
7.6	1.00555	-2.00224	-0.520962	1.28787	-0.0420502	-0.0913403
7.7	4.1675	2.1408	-0.563012	1.19653	-0.224894	0.350861
7.8	4.2714	2.01976	-0.787906	1.54739	-0.185392	0.384809
7.9	3.20287	0.731258	-0.973298	1.9322	0.238401	0.21389
8	1.87421	-2.25241	-0.734897	2.14609	-0.118084	-0.145544
8.1	1.56293	-0.588432	-0.852981	2.00054	0.130006	-0.0867514
8.2	4.279	0.700848	-0.722974	1.91379	0.327042	0.275938
8.3	1.69367	1.31031	-0.395933	2.18973	0.0436214	0.163654
8.4	4.7787	1.69437	-0.352311	2.35338	-0.0589002	0.474226
8.5	3.11557	1.68426	-0.411211	2.82761	-0.0352737	0.309554
8.6	2.64231	-1.68893	-0.446485	3.13716	-0.0311419	-0.262389
8.7	0.225883	2.02094	-0.477627	2.87477	-0.00982804	0.0203382
8.8	4.541	-1.22878	-0.487455	2.89511	0.152301	-0.427798
8.9	4.92968	-1.26249	-0.335154	2.46731	0.149588	-0.469725
9	2.81019	3.13998	-0.185566	1.99759	-0.281019	0.000452293
9.1	3.19813	1.62797	-0.466586	1.99804	-0.0182748	0.31929
9.2	1.56497	-1.50281	-0.48486	2.31733	0.0106311	-0.156136
9.3	4.07024	-2.76075	-0.474229	2.1612	-0.377861	-0.151294
9.4	4.60467	-2.10292	-0.85209	2.0099	-0.233623	-0.3968
9.5	4.69453	-2.72407	-1.08571	1.6131	-0.429126	-0.190362
9.6	2.86362	-2.93284	-1.51484	1.42274	-0.280145	-0.0593465
9.7	4.59947	-1.13049	-1.79498	1.36339	0.196037	-0.416077
9.8	4.18784	-2.23835	-1.59895	0.947317	-0.259254	-0.328888
9.9	1.18389	0.461707	-1.8582	0.618429	0.105991	0.0527396
0	1.57022	0.743793	0	0	0.115554	0.106317
0.1	3.80028	-0.598903	0.115554	0.106317	0.313886	-0.214236
0.2	1.35811	-2.62812	0.42944	-0.107918	-0.118298	-0.0667108
0.3	3.20697	0.576396	0.311142	-0.174629	0.268883	0.174782
0.4	1.02236	0.445853	0.580025	0.000152458	0.092242	0.0440871
0.5	2.15567	-0.872178	0.672267	0.0442395	0.138644	-0.165066
0.6	4.44645	-2.81575	0.810911	-0.120827	-0.421249	-0.142332
0.7	0.755913	1.73412	0.389662	-0.263159	-0.0122909	0.0745854
0.8	1.57349	1.19546	0.377371	-0.188574	0.0576815	0.146395
0.9	4.59341	2.81109	0.435053	-0.0421788	-0.434481	0.149065
1	1.47637	-1.48227	0.000571832	0.106886	0.0130534	-0.147059
1.1	2.82044	-0.164604	0.0136252	-0.0401728	0.278232	-0.0462162
1.2	2.65154	2.09657	0.291857	-0.086389	-0.133077	0.229341
1.3	0.627148	-0.866757	0.15878	0.142952	0.0405954	-0.0478033
1.4	4.69496	0.960021	0.199375	0.0951485	0.269257	0.384613
1.5	0.461245	1.64833	0.468632	0.479761	-0.00357264	0.0459859
1.6	1.07273	0.191895	0.46506	0.525747	0.105304	0.0204591
1.7	1.76893	1.88135	0.570364	0.546206	-0.0540555	0.168431
1.8	4.83562	-2.00786	0.516308	0.714638	-0.204681	-0.438107
1.9	1.27622	-3.09397	0.311627	0.276531	-0.127477	-0.00607534
2	0.740878	2.08411	0.18415	0.270455	-0.0363823	0.0645393
2.1	4.81188	0.365837	0.147768	0.334995	0.449345	0.172136
2.2	3.89615	-0.791027	0.597113	0.50713	0.273945	-0.277046
2.3	2.57198	0.560093	0.871058	0.230085	0.2179	0.13664
2.4	1.31097	-2.15315	1.08896	0.366725	-0.0721021	-0.109488
2.5	2.48336	-1.29304	1.01686	0.257237	0.0680928	-0.238818
2.6	3.46143	1.26229	1.08495	0.0184183	0.105102	0.3298
2.7	3.85303	0.851835	1.19005	0.348219	0.253762	0.289936
2.8	1.39117	-2.7106	1.44381	0.638155	-0.126395	-0.0581186
2.9	4.46197	0.687363	1.31742	0.580036	0.344876	0.283113
3	4.06439	-1.81707	1.66229	0.863149	-0.0990859	-0.394176
3.1	0.957841	-2.40598	1.56321	0.468973	-0.0710163	-0.064275
3.2	4.59942	-1.42392	1.49219	0.404698	0.0673122	-0.45499
3.3	2.80254	2.58659	1.5595	-0.0502918	-0.238187	0.147679
3.4	2.32082	-0.957592	1.32131	0.0973873	0.133561	-0.189798
3.5	2.15145	-3.00102	1.45488	-0.092411	-0.213023	-0.030143
3.6	3.21746	-0.0888449	1.24185	-0.122554	0.320477	-0.0285479
3.7	3.21024	0.79187	1.56233	-0.151102	0.225525	0.228463
3.8	0.163282	0.0732803	1.78785	0.0773607	0.0162844	0.00119546
3.9	0.271336	-2.06851	1.80414	0.0785561	-0.012954	-0.0238417
4	0.904766	0.569526	1.79119	0.0547144	0.0761955	0.048788
4.1	3.88465	1.54811	1.86738	0.103502	0.00881107	0.388365
4.2	3.32685	-1.03063	1.87619	0.491867	0.171092	-0.285318
4.3	4.09049	1.77425	2.04728	0.206549	-0.0826498	0.400612
4.4	2.98413	2.87113	1.96463	0.607161	-0.287565	0.0797284
4.5	4.87648	1.28737	1.67707	0.686889	0.136371	0.468192
4.6	0.290875	-0.240877	1.81344	1.15508	0.0282478	-0.00693897
4.7	0.673963	-2.7404	1.84169	1.14814	-0.0620447	-0.0263196
4.8	2.55378	0.824211	1.77964	1.12182	0.173436	0.187451
4.9	1.9572	2.12428	1.95308	1.30927	-0.102881	0.166498
5	1.55799	0.154035	1.8502	1.47577	0.153954	0.0239036
5.1	4.46852	-2.89507	2.00415	1.49967	-0.433343	-0.109046
5.2	2.72034	1.53735	1.57081	1.39063	0.00909603	0.271882
5.3	1.76313	2.16531	1.57991	1.66251	-0.0987536	0.146062
5.4	0.601653	-1.56173	1.48115	1.80857	0.000545352	-0.0601629
5.5	3.04309	-0.706127	1.4817	1.74841	0.231543	-0.197463
5.6	2.94242	-2.89617	1.71324	1.55095	-0.285426	-0.0714902
5.7	0.857655	-0.489216	1.42782	1.47946	0.0757053	-0.0403041
5.8	2.5947	-0.428862	1.50352	1.43915	0.235973	-0.107897
5.9	1.39158	2.33827	1.73949	1.33125	-0.0966201	0.100148
6	1.29109	1.0236	1.64287	1.4314	0.0671751	0.110257
6.1	0.107497	-2.21991	1.71005	1.54166	-0.00649802	-0.00856343
6.2	4.86701	1.49604	1.70355	1.53309	0.0363495	0.485342
6.3	0.103074	2.27499	1.7399	2.01844	-0.00667318	0.00785562
6.4	3.20118	1.52556	1.73323	2.02629	0.0144759	0.319791
6.5	1.70356	-1.60376	1.7477	2.34608	-0.00561408	-0.170263
6.6	0.183601	-2.24256	1.74209	2.17582	-0.0114268	-0.0143709
6.7	1.65289	0.816099	1.73066	2.16145	0.113235	0.12041
6.8	4.57926	-1.24273	1.8439	2.28186	0.147549	-0.433504
6.9	1.49605	-2.15851	1.99145	1.84835	-0.0829503	-0.124503
7	3.18609	1.44545	1.9085	1.72385	0.0398328	0.31611
7.1	3.71478	-3.09217	1.94833	2.03996	-0.371025	-0.0183512
7.2	1.97722	-2.73092	1.5773	2.02161	-0.181282	-0.0789363
7.3	3.79711	0.535241	1.39602	1.94267	0.326607	0.193671
7.4	4.6337	-0.034756	1.72263	2.13635	0.46309	-0.0161016
7.5	0.266922	-1.90769	2.18572	2.12024	-0.0088232	-0.0251918
7.6	2.94365	-2.36191	2.17689	2.09505	-0.209334	-0.206954
7.7	4.82134	1.37088	1.96756	1.8881	0.0957438	0.472532
7.8	1.2613	-2.36209	2.0633	2.36063	-0.0897116	-0.08866
7.9	4.76252	-2.90565	1.97359	2.27197	-0.463057	-0.11133
8	1.55283	0.675131	1.51054	2.16064	0.121218	0.0970519
8.1	1.49135	3.13914	1.63175	2.25769	-0.149134	0.000366261
8.2	1.80445	-1.22415	1.48262	2.25806	0.0613052	-0.169712
8.3	0.947802	0.646772	1.54393	2.08835	0.0756377	0.0571158
8.4	0.646859	1.30253	1.61956	2.14546	0.0171458	0.0623721
8.5	0.239381	0.580165	1.63671	2.20783	0.0200212	0.013122
8.6	2.10954	0.463265	1.65673	2.22096	0.188719	0.0942693
8.7	3.00914	-1.0801	1.84545	2.31523	0.141802	-0.265408
8.8	1.39988	1.77413	1.98725	2.04982	-0.0282691	0.137104
8.9	2.90611	-3.046	1.95898	2.18692	-0.289284	-0.0277365
9	1.63866	-1.55073	1.6697	2.15919	0.00328765	-0.163833
9.1	3.96638	-1.25407	1.67299	1.99535	0.123536	-0.376909
9.2	0.457701	-0.981077	1.79652	1.61844	0.025454	-0.0380394
9.3	1.7759	3.1156	1.82198	1.5804	-0.17753	0.00461624
9.4	2.98875	2.13756	1.64445	1.58502	-0.160468	0.252143
9.5	1.33787	0.772582	1.48398	1.83716	0.0958062	0.0933815
9.6	3.85824	2.15629	1.57978	1.93055	-0.213211	0.321561
9.7	0.544859	0.414904	1.36657	2.25211	0.0498631	0.0219634
9.8	3.4651	0.841713	1.41644	2.27407	0.23084	0.258422
9.9	1.3757	-0.84307	1.64728	2.53249	0.0915081	-0.102722
0	4.81505	1.28249	0	0	0.136908	0.461631
0.1	1.47754	0.918053	0.136908	0.461631	0.0897412	0.117379
0.2	2.34723	-0.102545	0.226649	0.57901	0.23349	-0.0240276
0.3	1.24098	-1.64824	0.460139	0.554982	-0.00960127	-0.123726
0.4	4.08356	-0.0662273	0.450538	0.431257	0.407461	-0.0270245
0.5	4.3571	0.406016	0.857999	0.404232	0.400288	0.172085
0.6	1.25625	-2.25249	1.25829	0.576317	-0.0791578	-0.0975482
0.7	1.37052	-1.19343	1.17913	0.478769	0.0505	-0.127409
0.8	1.30242	1.63293	1.22963	0.35136	-0.0080866	0.12999
0.9	2.27728	-3.13382	1.22154	0.481351	-0.227721	-0.00176972
1	3.37489	-2.70542	0.993821	0.479581	-0.305892	-0.142581
1.1	0.775866	-1.01034	0.68793	0.337	0.041243	-0.0657168
1.2	4.95193	1.11404	0.729173	0.271283	0.218398	0.444431
1.3	2.19242	-1.70782	0.94757	0.715715	-0.029947	-0.217187
1.4	1.49182	0.107174	0.917623	0.498528	0.148326	0.0159578
1.5	3.42881	0.775014	1.06595	0.514485	0.244958	0.239923
1.6	3.20247	0.910763	1.31091	0.754408	0.196357	0.252986
1.7	2.95436	-1.10491	1.50726	1.00739	0.132714	-0.26395
1.8	4.33887	0.192694	1.63998	0.743444	0.425856	0.0830909
1.9	4.98753	-3.07627	2.06583	0.826535	-0.49769	-0.0325551
2	4.79561	-1.97153	1.56815	0.79398	-0.187073	-0.441568
2.1	1.63114	1.60309	1.38107	0.352412	-0.00526695	0.163029
2.2	1.95497	-2.5903	1.3758	0.515441	-0.166533	-0.1024
2.3	4.5433	-0.926528	1.20927	0.413042	0.272877	-0.363255
2.4	1.56204	0.113889	1.48215	0.0497868	0.155192	0.0177515
2.5	0.940838	-0.927584	1.63734	0.0675384	0.0564285	-0.0752834
2.6	4.54071	2.35262	1.69377	-0.00774498	-0.319926	0.322224
2.7	0.986204	-1.65076	1.37384	0.314479	-0.00787733	-0.0983053
2.8	3.86532	1.1238	1.36597	0.216174	0.167082	0.348555
2.9	1.99894	3.10713	1.53305	0.564729	-0.199775	0.00688735
3	2.49935	1.45798	1.33327	0.571617	0.0281378	0.248346
3.1	0.0930209	1.39949	1.36141	0.819963	0.00158574	0.00916594
3.2	0.0782263	2.28448	1.363	0.829129	-0.00512085	0.00591358
3.3	1.18432	-0.506206	1.35788	0.835042	0.103579	-0.0574232
3.4	4.01033	0.128439	1.46145	0.777619	0.39773	0.0513666
3.5	1.57949	-0.00883119	1.85918	0.828986	0.157943	-0.00139486
3.6	0.410674	2.70008	2.01713	0.827591	-0.0371293	0.0175486
3.7	1.75907	-0.284715	1.98	0.84514	0.168825	-0.0494093
3.8	1.57579	2.01782	2.14882	0.79573	-0.0681187	0.142095
3.9	3.7494	-0.123551	2.0807	0.937825	0.372082	-0.0462062
4	0.95756	1.89985	2.45279	0.891619	-0.0309436	0.0906185
4.1	2.84574	2.83444	2.42184	0.982238	-0.271256	0.0860393
4.2	2.02889	2.28147	2.15059	1.06828	-0.132354	0.153775
4.3	1.20902	-2.85515	2.01823	1.22205	-0.115976	-0.0341599
4.4	2.12573	-1.51309	1.90226	1.18789	0.0122605	-0.212219
4.5	4.89401	2.09985	1.91452	0.975673	-0.24701	0.422492
4.6	0.754528	1.84544	1.66751	1.39816	-0.0204628	0.0726251
4.7	3.65546	-0.840789	1.64704	1.47079	0.243774	-0.272394
4.8	3.93217	-2.47882	1.89082	1.1984	-0.309969	-0.241948
4.9	0.576441	-1.95831	1.58085	0.956447	-0.0217831	-0.0533699
5	4.63107	-0.07941	1.55907	0.903077	0.461648	-0.0367367
5.1	1.22645	2.19757	2.02071	0.86634	-0.0719348	0.0993331
5.2	3.3861	-2.24919	1.94878	0.965673	-0.212493	-0.263635
5.3	2.08751	-2.63749	1.73629	0.702038	-0.182785	-0.100831
5.4	1.14486	2.12816	1.5535	0.601207	-0.0605568	0.0971588
5.5	4.70836	-2.17466	1.49294	0.698366	-0.267352	-0.387568
5.6	4.60048	-0.798821	1.22559	0.310798	0.320907	-0.32964
5.7	2.32716	0.430843	1.5465	-0.0188422	0.211449	0.0971906
5.8	0.534772	0.305782	1.75795	0.0783484	0.0509965	0.0160987
5.9	2.56405	1.9197	1.80894	0.0944471	-0.0876573	0.240956
6	1.93256	0.594244	1.72129	0.335403	0.160126	0.108201
6.1	0.821276	2.68009	1.88141	0.443604	-0.0735358	0.0365707
6.2	0.124433	0.649289	1.80788	0.480175	0.00991127	0.00752348
6.3	0.836272	-3.08325	1.81779	0.487698	-0.0834849	-0.00487622
6.4	3.06476	3.10357	1.7343	0.482822	-0.306254	0.0116507
6.5	2.7435	-1.06532	1.42805	0.494473	0.132846	-0.240041
6.6	2.22203	-1.68747	1.5609	0.254432	-0.0258664	-0.220692
6.7	2.49233	2.82988	1.53503	0.0337393	-0.237222	0.076437
6.8	0.622177	-0.470795	1.29781	0.110176	0.0554489	-0.0282216
6.9	4.42652	-2.30974	1.35326	0.0819547	-0.29813	-0.327199
7	3.46888	2.90717	1.05513	-0.245244	-0.3374	0.0805746
7.1	2.4144	0.489466	0.717726	-0.164669	0.213091	0.113514
7.2	4.61926	-2.8863	0.930817	-0.0511552	-0.446955	-0.116649
7.3	0.325843	2.0845	0.483862	-0.167804	-0.0160122	0.0283786
7.4	2.21375	0.223649	0.46785	-0.139425	0.215862	0.0490986
7.5	4.42151	2.20827	0.683711	-0.0903269	-0.263153	0.355314
7.6	1.99752	2.313	0.420558	0.264987	-0.135015	0.147213
7.7	2.36087	-2.24081	0.285543	0.4122	-0.146609	-0.185048
7.8	0.9563	-1.4381	0.138934	0.227152	0.0126522	-0.0947893
7.9	1.56798	-0.391391	0.151586	0.132363	0.144941	-0.0598145
8	2.78237	-0.978839	0.296527	0.072548	0.155252	-0.230895
8.1	3.42473	0.970944	0.45178	-0.158347	0.193333	0.282684
8.2	2.13525	0.987241	0.645113	0.124337	0.117651	0.178188
8.3	1.29192	-2.87395	0.762764	0.302525	-0.124593	-0.0341667
8.4	4.65718	-2.17135	0.638171	0.268359	-0.263177	-0.384227
8.5	0.0229399	0.463306	0.374994	-0.115869	0.00205216	0.0010252
8.6	2.78153	2.49329	0.377046	-0.114843	-0.221718	0.167959
8.7	0.432202	-1.09403	0.155328	0.0531159	0.019834	-0.0384005
8.8	1.10514	-2.28415	0.175162	0.0147154	-0.0723179	-0.0835674
8.9	1.87632	-0.554705	0.102844	-0.068852	0.159498	-0.0988245
9	0.608393	-1.12899	0.262342	-0.167676	0.0260134	-0.0549975
9.1	3.13594	-0.250035	0.288355	-0.222674	0.303843	-0.0775952
9.2	4.35684	1.21141	0.592198	-0.300269	0.15323	0.407849
9.3	1.85311	-1.54767	0.745429	0.10758	0.00428489	-0.185261
9.4	3.70436	-2.32875	0.749714	-0.0776813	-0.254653	-0.269026
9.5	1.74885	0.714675	0.495061	-0.346708	0.132092	0.114615
9.6	2.82763	0.879511	0.627153	-0.232093	0.18027	0.217849
9.7	0.347869	-3.09432	0.807422	-0.0142441	-0.0347481	-0.00164371
9.8	0.67104	-0.0442252	0.772674	-0.0158878	0.0670384	-0.00296672
9.9	1.19119	-0.107399	0.839712	-0.0188546	0.118433	-0.0127654
0	1.26545	0.0677985	0	0	0.126254	0.00857296
0.1	2.21606	2.06916	0.126254	0.00857296	-0.105924	0.194652
0.2	1.67466	0.153263	0.0203297	0.203225	0.165503	0.025566
0.3	1.9735	1.6796	0.185832	0.228791	-0.0214291	0.196183
0.4	2.00857	1.3438	0.164403	0.424973	0.0452027	0.195704
0.5	1.84355	1.57032	0.209606	0.620678	8.78299e-05	0.184355
0.6	1.2408	-0.774078	0.209694	0.805033	0.0887253	-0.086739
0.7	3.64769	-2.94043	0.298419	0.718294	-0.357413	-0.0728823
0.8	2.65882	-1.54436	-0.0589942	0.645412	0.00702934	-0.26579
0.9	2.30154	1.07133	-0.0519649	0.379622	0.110234	0.202038
1	3.94216	1.74575	0.0582692	0.58166	-0.068618	0.388199
1.1	1.71515	-0.118047	-0.0103488	0.969859	0.170321	-0.0201999
1.2	4.35602	-1.4223	0.159972	0.949659	0.0644487	-0.430808
1.3	3.1951	0.548395	0.224421	0.518851	0.272658	0.166566
1.4	2.54069	-0.446584	0.497079	0.685418	0.229152	-0.109729
1.5	3.42648	-3.11625	0.72623	0.575689	-0.342538	-0.00868203
1.6	2.32724	-0.0401726	0.383692	0.567007	0.232536	-0.00934662
1.7	2.84123	-2.27025	0.616228	0.55766	-0.182919	-0.217409
1.8	1.57139	-2.71809	0.433309	0.340251	-0.143256	-0.0645776
1.9	3.20923	-1.20844	0.290053	0.275674	0.11376	-0.300084
2	3.56677	2.62634	0.403813	-0.0244099	-0.310369	0.175754
2.1	4.7713	-0.0939563	0.0934443	0.151344	0.475026	-0.0447635
2.2	0.904451	1.39066	0.56847	0.106581	0.0162049	0.0889815
2.3	1.10159	2.48238	0.584675	0.195562	-0.0870778	0.0674715
2.4	0.382313	0.110361	0.497597	0.263034	0.0379987	0.00421067
2.5	2.82068	2.1512	0.535596	0.267245	-0.154675	0.235876
2.6	1.90887	2.54786	0.38092	0.503121	-0.158218	0.106794
2.7	0.840177	-1.04594	0.222702	0.609915	0.0421006	-0.0727083
2.8	0.320576	1.23502	0.264803	0.537206	0.0105631	0.0302673
2.9	0.907843	-1.49522	0.275366	0.567474	0.00685417	-0.0905252
3	4.39704	-2.12138	0.28222	0.476949	-0.230048	-0.374724
3.1	1.63579	1.38437	0.0521726	0.102225	0.0303188	0.160744
3.2	3.66108	0.964191	0.0824914	0.262969	0.208712	0.30079
3.3	4.44471	-2.10507	0.291203	0.56376	-0.226331	-0.382529
3.4	3.93151	2.03965	0.0648722	0.18123	-0.177652	0.350724
3.5	1.78583	-1.70648	-0.11278	0.531954	-0.024156	-0.176942
3.6	4.57784	1.01393	-0.136936	0.355012	0.241953	0.38862
3.7	3.46835	2.24941	0.105017	0.743632	-0.217712	0.269993
3.8	0.0675823	-0.0385166	-0.112695	1.01362	0.00675322	-0.00026024
3.9	2.68732	-2.44674	-0.105942	1.01336	-0.206425	-0.172062
4	2.16869	-3.0302	-0.312367	0.841302	-0.215525	-0.0241084
4.1	1.00128	-2.40082	-0.527892	0.817193	-0.0738894	-0.0675722
4.2	2.19524	-1.99695	-0.601781	0.749621	-0.0907441	-0.19989
4.3	2.61765	-1.14497	-0.692526	0.549731	0.108128	-0.238389
4.4	4.21936	2.59677	-0.584398	0.311342	-0.360847	0.218677
4.5	1.36139	-2.49039	-0.945245	0.530019	-0.108279	-0.0825195
4.6	4.6845	-1.13342	-1.05352	0.447499	0.198418	-0.424354
4.7	4.9479	-1.3927	-0.855106	0.0231456	0.0876549	-0.486964
4.8	3.44037	-0.436105	-0.767451	-0.463818	0.311837	-0.145326
4.9	3.7914	-2.34001	-0.455615	-0.609144	-0.263718	-0.272397
5	2.98804	0.796312	-0.719333	-0.881541	0.208968	0.213579
5.1	2.34758	-1.7866	-0.510365	-0.667961	-0.0502702	-0.229312
5.2	4.31871	-0.852793	-0.560636	-0.897274	0.284121	-0.325251
5.3	2.75613	-1.19225	-0.276515	-1.22252	0.101859	-0.2561
5.4	0.44717	2.19709	-0.174656	-1.47862	-0.0262106	0.03623
5.5	3.90661	1.2167	-0.200867	-1.44239	0.13546	0.366425
5.6	4.48775	-1.11509	-0.065407	-1.07597	0.197505	-0.402977
5.7	2.12348	3.0471	0.132098	-1.47895	-0.211401	0.0200355
5.8	2.11147	-0.770939	-0.0793026	-1.45891	0.151446	-0.147129
5.9	2.66051	-0.944451	0.0721439	-1.60604	0.155956	-0.215548
6	1.07639	-0.514948	0.2281	-1.82159	0.0936798	-0.0530109
6.1	0.934488	2.08611	0.321779	-1.8746	-0.046052	0.0813135
6.2	2.07747	2.87703	0.275728	-1.79329	-0.200519	0.0543231
6.3	4.33204	-2.05959	0.0752088	-1.73896	-0.203414	-0.382476
6.4	3.13431	0.244204	-0.128205	-2.12144	0.304132	0.0757827
6.5	4.9637	2.51902	0.175927	-2.04566	-0.403241	0.289447
6.6	2.32817	2.02052	-0.227314	-1.75621	-0.10121	0.209667
6.7	2.24923	1.79461	-0.328525	-1.54654	-0.0499214	0.219313
6.8	4.84193	-2.32937	-0.378446	-1.32723	-0.333069	-0.351436
6.9	0.210371	0.197694	-0.711516	-1.67866	0.0206274	0.00413187
7	3.72318	3.03157	-0.690888	-1.67453	-0.370066	0.0408812
7.1	4.54478	3.01454	-1.06095	-1.63365	-0.450815	0.0575856
7.2	4.19529	-1.36506	-1.51177	-1.57607	0.085703	-0.410682
7.3	1.3513	-0.803798	-1.42607	-1.98675	0.0937768	-0.0972929
7.4	3.83997	-1.79092	-1.33229	-2.08404	-0.0838458	-0.374731
7.5	3.99173	0.929932	-1.41614	-2.45877	0.238661	0.319969
7.6	4.57817	-0.519201	-1.17747	-2.1388	0.397484	-0.227163
7.7	2.8631	1.67326	-0.77999	-2.36597	-0.0292862	0.284808
7.8	2.82618	2.94248	-0.809276	-2.08116	-0.277035	0.0559008
7.9	3.39995	-1.11446	-1.08631	-2.02526	0.149824	-0.305204
8	4.08218	2.20366	-0.936487	-2.33046	-0.241442	0.329162
8.1	4.8276	2.05164	-1.17793	-2.0013	-0.223288	0.428018
8.2	2.76809	-1.76051	-1.40122	-1.57328	-0.0522009	-0.271842
8.3	0.467288	-0.846781	-1.45342	-1.84512	0.0309531	-0.035007
8.4	1.59081	-0.160226	-1.42246	-1.88013	0.157044	-0.02538
8.5	4.94904	1.44373	-1.26542	-1.90551	0.0627147	0.490914
8.6	3.28899	0.930176	-1.20271	-1.4146	0.196581	0.263687
8.7	4.01532	-1.13193	-1.00613	-1.15091	0.170617	-0.36348
8.8	4.84421	1.57919	-0.835509	-1.51439	-0.0040669	0.484404
8.9	4.95577	-0.851716	-0.839576	-1.02999	0.326433	-0.372878
9	1.93294	-0.694945	-0.513143	-1.40287	0.148467	-0.123775
9.1	0.906127	2.69113	-0.364675	-1.52664	-0.0815736	0.0394513
9.2	0.904825	-2.40002	-0.446249	-1.48719	-0.0667223	-0.0611164
9.3	2.38398	-2.59236	-0.512971	-1.5483	-0.203336	-0.124451
9.4	1.70814	-1.18403	-0.716307	-1.67276	0.06443	-0.158197
9.5	1.74237	-1.0121	-0.651877	-1.83095	0.09236	-0.147744
9.6	2.02441	1.7578	-0.559517	-1.9787	-0.0376374	0.198912
9.7	1.95447	2.73727	-0.597154	-1.77979	-0.179688	0.0768877
9.8	4.89052	1.4254	-0.776843	-1.7029	0.070857	0.483891
9.9	3.8446	-1.83716	-0.705986	-1.21901	-0.101194	-0.370904
0	3.00263	0.301699	0	0	0.286701	0.089221
0.1	0.656006	-1.00506	0.286701	0.089221	0.0351642	-0.0553797
0.2	0.306228	-0.01612	0.321865	0.0338413	0.0306188	-0.000493619
0.3	4.14837	2.57673	0.352484	0.0333477	-0.350396	0.222064
0.4	1.601	-1.89473	0.00208787	0.255411	-0.0509599	-0.151773
0.5	3.58822	-2.62843	-0.048872	0.103638	-0.312605	-0.176157
0.6	1.93868	2.17396	-0.361477	-0.0725189	-0.109971	0.15966
0.7	0.212656	-0.73327	-0.471448	0.0871411	0.0158001	-0.0142331
0.8	3.82192	-0.790324	-0.455648	0.0729079	0.268916	-0.271579
0.9	0.279456	-2.016	-0.186732	-0.198671	-0.0120344	-0.0252216
1	0.0880757	0.566052	-0.198766	-0.223892	0.0074338	0.00472353
1.1	4.93293	1.16895	-0.191332	-0.219169	0.192934	0.453998
1.2	4.79511	-2.05946	0.0016017	0.234829	-0.225106	-0.423389
1.3	2.51199	1.16412	-0.223504	-0.18856	0.0993633	0.230712
1.4	1.86567	0.556952	-0.124141	0.0421518	0.158371	0.0986195
1.5	0.536611	-2.35902	0.0342302	0.140771	-0.0380512	-0.0378368
1.6	2.51505	1.46863	-0.00382102	0.102934	0.0256513	0.250194
1.7	4.61798	3.04284	0.0218302	0.353128	-0.459549	0.0455275
1.8	0.675185	-1.25747	-0.437718	0.398656	0.0208107	-0.0642313
1.9	2.76963	2.64645	-0.416908	0.334424	-0.243699	0.131602
2	2.36039	2.20974	-0.660607	0.466026	-0.140761	0.189474
2.1	1.66801	2.19391	-0.801368	0.655501	-0.0973401	0.135453
2.2	3.4767	0.577544	-0.898709	0.790954	0.29128	0.189817
2.3	2.8411	1.00304	-0.607428	0.980771	0.152778	0.239536
2.4	0.81762	3.01757	-0.45465	1.22031	-0.081134	0.0101142
2.5	2.62118	-0.532815	-0.535784	1.23042	0.225784	-0.133146
2.6	3.04638	1.55629	-0.31	1.09728	0.00442031	0.304606
2.7	3.98004	-0.654529	-0.30558	1.40188	0.31575	-0.242299
2.8	4.71352	-1.50972	0.0101701	1.15958	0.0287688	-0.470474
2.9	3.85717	-0.221611	0.0389388	0.689109	0.376284	-0.0847814
3	3.62739	0.341245	0.415223	0.604328	0.341823	0.121394
3.1	2.11107	-1.54465	0.757047	0.725722	0.00551984	-0.211035
3.2	3.67678	1.65448	0.762566	0.514687	-0.0307338	0.366391
3.3	4.08271	-2.88795	0.731833	0.881079	-0.395208	-0.102449
3.4	3.60172	1.50849	0.336624	0.77863	0.0224265	0.359473
3.5	3.47029	-1.55815	0.359051	1.1381	0.00438695	-0.347001
3.6	1.05133	2.00908	0.363438	0.791102	-0.0446175	0.0951959
3.7	4.48381	1.82156	0.31882	0.886298	-0.111263	0.434357
3.8	4.819	2.18984	0.207558	1.32065	-0.279625	0.392476
3.9	3.51065	-1.93461	-0.0720672	1.71313	-0.124923	-0.328086
4	1.13523	-0.230382	-0.19699	1.38504	0.110523	-0.0259229
4.1	0.918645	1.21924	-0.0864669	1.35912	0.0316343	0.086246
4.2	1.62295	0.036025	-0.0548327	1.44537	0.162189	0.00584541
4.3	2.04346	-0.0751901	0.107357	1.45121	0.203768	-0.0153503
4.4	0.787226	-3.09511	0.311125	1.43586	-0.0786376	-0.00365802
4.5	2.99074	1.85818	0.232487	1.4322	-0.0847713	0.286809
4.6	0.183925	1.27135	0.147716	1.71901	0.00542564	0.0175741
4.7	1.50005	2.98648	0.153142	1.73659	-0.148204	0.0231747
4.8	3.58434	0.766358	0.00493776	1.75976	0.258231	0.24858
4.9	4.48722	2.96109	0.263168	2.00834	-0.441433	0.0805552
5	2.10496	-2.76902	-0.178264	2.0889	-0.196055	-0.0766242
5.1	2.47716	-2.21778	-0.374319	2.01227	-0.149319	-0.197654
5.2	1.99439	-2.64804	-0.523638	1.81462	-0.175637	-0.0944864
5.3	2.45889	-1.77334	-0.699274	1.72013	-0.0494639	-0.240863
5.4	3.90582	-2.2057	-0.748738	1.47927	-0.231653	-0.31447
5.5	3.78967	-2.59134	-0.980391	1.1648	-0.323029	-0.198162
5.6	2.4852	1.16295	-1.30342	0.966638	0.0985724	0.228135
5.7	1.01549	-2.81442	-1.20485	1.19477	-0.0961628	-0.0326345
5.8	4.76966	3.00257	-1.30101	1.16214	-0.472364	0.066098
5.9	1.83605	-2.08152	-1.77337	1.22824	-0.0897476	-0.160176
6	2.56806	0.297154	-1.86312	1.06806	0.245552	0.0751929
6.1	1.67396	-1.92903	-1.61757	1.14325	-0.0586922	-0.156769
6.2	4.82179	2.02802	-1.67626	0.986484	-0.212863	0.43265
6.3	1.99862	1.85515	-1.88913	1.41913	-0.0560683	0.191836
6.4	3.34074	2.23917	-1.94519	1.61097	-0.207029	0.262191
6.5	1.27404	-2.17963	-2.15222	1.87316	-0.0728642	-0.104511
6.6	1.1905	-2.4854	-2.22509	1.76865	-0.0943259	-0.0726327
6.7	2.96595	0.277352	-2.31941	1.69602	0.285261	0.0812106
6.8	0.724567	1.46109	-2.03415	1.77723	0.00793338	0.0720211
6.9	3.29458	-0.328975	-2.02622	1.84925	0.311791	-0.106439
7	2.44082	-2.18495	-1.71443	1.74281	-0.140656	-0.199479
7.1	2.38005	-1.69101	-1.85508	1.54333	-0.0285421	-0.236287
7.2	0.77666	-2.88144	-1.88363	1.30704	-0.0750525	-0.0199782
7.3	1.94084	-1.63322	-1.95868	1.28707	-0.0121083	-0.193706
7.4	1.15145	1.44043	-1.97079	1.09336	0.0149689	0.114168
7.5	1.88186	2.96785	-1.95582	1.20753	-0.185353	0.032532
7.6	3.71325	0.279799	-2.14117	1.24006	0.356884	0.102546
7.7	0.868499	-1.94887	-1.78429	1.34261	-0.032059	-0.0807163
7.8	4.96944	2.21611	-1.81635	1.26189	-0.298888	0.397013
7.9	0.333926	2.60613	-2.11523	1.6589	-0.0287187	0.0170381
8	3.62089	0.275328	-2.14395	1.67594	0.348451	0.0984385
8.1	4.96317	-1.95784	-1.7955	1.77438	-0.187338	-0.459603
8.2	3.6677	-2.86876	-1.98284	1.31478	-0.353203	-0.0988312
8.3	3.27166	1.6661	-2.33604	1.21594	-0.0311333	0.325682
8.4	3.54418	-3.0379	-2.36717	1.54163	-0.352515	-0.0366847
8.5	2.76933	1.90401	-2.71969	1.50494	-0.0905785	0.261701
8.6	4.85141	2.54579	-2.81027	1.76664	-0.401551	0.272248
8.7	3.68118	0.964664	-3.21182	2.03889	0.209714	0.302541
8.8	2.01478	1.16668	-3.0021	2.34143	0.0792222	0.185249
8.9	4.75356	0.0875889	-2.92288	2.52668	0.473533	0.0415827
9	2.64897	-0.563787	-2.44935	2.56826	0.223901	-0.141558
9.1	1.74745	-2.40387	-2.22545	2.42671	-0.129311	-0.117534
9.2	1.51524	-1.29901	-2.35476	2.30917	0.0406767	-0.145962
9.3	4.89986	-1.88002	-2.31408	2.16321	-0.149114	-0.466746
9.4	0.842113	-0.607834	-2.4632	1.69646	0.069128	-0.0480923
9.5	4.68823	0.584521	-2.39407	1.64837	0.390988	0.258697
9.6	0.963522	2.80968	-2.00308	1.90707	-0.0910934	0.0313962
9.7	0.979371	-1.41218	-2.09417	1.93846	0.0154695	-0.0967077
9.8	2.09123	-0.360957	-2.0787	1.84176	0.195647	-0.0738562
9.9	1.29765	2.18666	-1.88306	1.7679	-0.0749626	0.105924
0	0.275967	-1.63248	0	0	-0.0017013	-0.0275442
0.1	3.04314	-3.05007	-0.0017013	-0.0275442	-0.30304	-0.0278123
0.2	0.496784	1.13705	-0.304742	-0.0553565	0.0208784	0.0450782
0.3	4.70587	-1.65179	-0.283863	-0.0102783	-0.0380746	-0.469045
0.4	2.85566	0.974753	-0.321938	-0.479323	0.160309	0.236324
0.5	1.54654	-1.93625	-0.161629	-0.242999	-0.0552699	-0.144441
0.6	3.76191	-1.1746	-0.216899	-0.38744	0.145175	-0.34705
0.7	3.91218	-0.903821	-0.0717234	-0.73449	0.242012	-0.307378
0.8	4.53136	2.99059	0.170289	-1.04187	-0.44798	0.0681668
0.9	1.00684	-0.463629	-0.277691	-0.973701	0.0900551	-0.0450254
1	3.35818	1.09908	-0.187636	-1.01873	0.1526	0.299144
1.1	4.07597	2.90673	-0.0350359	-0.719582	-0.396407	0.0948507
1.2	1.63456	0.467718	-0.431443	-0.624732	0.145901	0.0736944
1.3	3.2941	-0.917198	-0.285542	-0.551037	0.200297	-0.261519
1.4	0.642371	-1.13054	-0.085245	-0.812556	0.0273758	-0.0581117
1.5	4.30876	2.89376	-0.0578692	-0.870668	-0.417711	0.105695
1.6	0.280799	-0.385498	-0.47558	-0.764973	0.0260192	-0.0105586
1.7	3.78862	-2.58836	-0.449561	-0.775531	-0.322348	-0.199068
1.8	4.66485	-1.65333	-0.771909	-0.9746	-0.0384577	-0.464897
1.9	2.94352	-1.24498	-0.810367	-1.4395	0.0942176	-0.278865
2	4.13319	-2.04632	-0.716149	-1.71836	-0.189219	-0.367462
2.1	1.10498	-1.24009	-0.905368	-2.08582	0.03588	-0.104511
2.2	4.60043	-2.90406	-0.869488	-2.19034	-0.447126	-0.108252
2.3	0.168011	1.19164	-1.31661	-2.29859	0.00621874	0.0156079
2.4	2.57314	1.99103	-1.3104	-2.28298	-0.104978	0.234926
2.5	2.89338	0.0687152	-1.41537	-2.04805	0.288655	0.0198663
2.6	3.85812	0.999315	-1.12672	-2.02819	0.208678	0.324507
2.7	1.7499	-1.49895	-0.918041	-1.70368	0.0125613	-0.174539
2.8	1.93227	-0.785828	-0.90548	-1.87822	0.136573	-0.136691
2.9	4.67384	-1.59973	-0.768907	-2.01491	-0.013519	-0.467189
3	0.291453	-3.12868	-0.782426	-2.4821	-0.0291429	-0.000376407
3.1	0.83772	1.27394	-0.811569	-2.48248	0.0245047	0.0801078
3.2	2.04231	0.186169	-0.787064	-2.40237	0.200702	0.0378021
3.3	1.61357	3.02054	-0.586362	-2.36457	-0.160176	0.0194854
3.4	0.794842	1.44952	-0.746539	-2.34508	0.00961583	0.0789004
3.5	1.89931	-2.63622	-0.736923	-2.26618	-0.166188	-0.0919513
3.6	2.94692	-0.819813	-0.903111	-2.35813	0.201086	-0.215426
3.7	2.88712	0.461527	-0.702026	-2.57356	0.258505	0.128568
3.8	3.47469	1.21982	-0.443521	-2.44499	0.119464	0.326287
3.9	0.847571	1.5535	-0.324057	-2.1187	0.00146586	0.0847444
4	4.42124	-2.79159	-0.322591	-2.03396	-0.415319	-0.151604
4.1	4.63695	1.20278	-0.737911	-2.18556	0.166823	0.432647
4.2	3.6722	-1.11711	-0.571088	-1.75291	0.160947	-0.330071
4.3	0.905197	-1.76005	-0.410141	-2.08299	-0.017029	-0.0889035
4.4	1.40634	0.335203	-0.42717	-2.17189	0.132807	0.0462632
4.5	2.2426	2.49067	-0.294363	-2.12563	-0.178404	0.135885
4.6	1.92878	-0.585783	-0.472767	-1.98974	0.160721	-0.106633
4.7	2.83581	0.580295	-0.312046	-2.09637	0.237159	0.155479
4.8	2.36696	1.03189	-0.0748862	-1.94089	0.121471	0.203149
4.9	2.59842	0.0845338	0.046585	-1.73775	0.258915	0.0219393
5	4.14365	-0.457312	0.3055	-1.71581	0.371786	-0.182958
5.1	1.19855	2.36994	0.677286	-1.89876	-0.0859074	0.0835772
5.2	3.21528	-0.594722	0.591378	-1.81519	0.266323	-0.180145
5.3	3.76274	-3.04696	0.857702	-1.99533	-0.374591	-0.0355549
5.4	0.357989	1.77421	0.483111	-2.03089	-0.00723181	0.0350608
5.5	3.22296	0.89923	0.475879	-1.99583	0.200536	0.252309
5.6	3.54391	2.68166	0.676415	-1.74352	-0.317564	0.157309
5.7	1.30797	0.821666	0.358852	-1.58621	0.0890731	0.0957803
5.8	0.862158	1.4587	0.447925	-1.49043	0.00964413	0.0856747
5.9	0.72496	1.61004	0.457569	-1.40475	-0.00284458	0.0724402
6	0.660319	-2.21977	0.454724	-1.33231	-0.0399079	-0.0526077
6.1	2.55493	-2.60624	0.414817	-1.38492	-0.219747	-0.130337
6.2	1.37479	-2.1115	0.195069	-1.51526	-0.0707662	-0.117867
6.3	2.20463	2.85385	0.124303	-1.63313	-0.211399	0.0625638
6.4	1.16222	0.0657778	-0.0870958	-1.57056	0.115971	0.00763932
6.5	2.70367	-2.64425	0.0288749	-1.56292	-0.237612	-0.128991
6.6	3.08928	-0.542046	-0.208737	-1.69191	0.264645	-0.159373
6.7	1.19833	2.78998	0.0559077	-1.85129	-0.112501	0.0412722
6.8	0.980735	0.0180741	-0.0565936	-1.81001	0.0980575	0.0017725
6.9	3.36521	-1.17608	0.0414638	-1.80824	0.129409	-0.310645
7	0.559756	2.86959	0.170872	-2.11889	-0.0539176	0.0150385
7.1	3.56681	2.53891	0.116955	-2.10385	-0.29384	0.202186
7.2	4.46101	2.25517	-0.176885	-1.90166	-0.282019	0.345647
7.3	1.58701	2.18867	-0.458904	-1.55601	-0.0919367	0.129359
7.4	4.02705	-0.688475	-0.550841	-1.42666	0.310975	-0.255863
7.5	4.51982	2.62009	-0.239866	-1.68252	-0.391901	0.22517
7.6	1.91316	3.03197	-0.631767	-1.45735	-0.190167	0.02093
7.7	0.435898	1.73589	-0.821934	-1.43642	-0.00716356	0.0429971
7.8	4.35147	-0.62021	-0.829098	-1.39342	0.354104	-0.25291
7.9	1.16599	-2.0415	-0.474994	-1.64633	-0.0528797	-0.103919
8	2.36294	1.69281	-0.527874	-1.75025	-0.0287602	0.234537
8.1	2.84097	-0.122117	-0.556634	-1.51571	0.281981	-0.0346068
8.2	1.67173	-3.11551	-0.274653	-1.55032	-0.167116	-0.00435998
8.3	0.267247	-1.16528	-0.441769	-1.55468	0.0105428	-0.0245572
8.4	1.08817	2.94353	-0.431226	-1.57924	-0.106689	0.0214118
8.5	0.169313	1.29382	-0.537915	-1.55783	0.00462977	0.016286
8.6	3.48875	-1.45172	-0.533286	-1.54154	0.041446	-0.346404
8.7	3.67776	1.54433	-0.49184	-1.88794	0.00973318	0.367647
8.8	3.67401	2.38819	-0.482107	-1.5203	-0.267969	0.251349
8.9	2.80928	0.14706	-0.750075	-1.26895	0.277895	0.0411645
9	1.70329	1.52717	-0.47218	-1.22778	0.00742887	0.170167
9.1	0.0995416	0.306754	-0.464751	-1.05762	0.00948948	0.00300582
9.2	4.4679	1.35114	-0.455262	-1.05461	0.097352	0.436055
9.3	3.03196	0.139941	-0.35791	-0.618556	0.300232	0.0422911
9.4	0.72898	-0.846195	-0.0576783	-0.576264	0.0483195	-0.0545833
9.5	2.59451	-0.17946	-0.0093588	-0.630848	0.255284	-0.0463116
9.6	2.07762	0.95986	0.245925	-0.677159	0.119179	0.17018
9.7	4.25339	-2.39147	0.365105	-0.506979	-0.311179	-0.289966
9.8	0.0214604	2.72356	0.0539252	-0.796945	-0.00196124	0.000871218
9.9	1.08349	-2.5273	0.051964	-0.796074	-0.088544	-0.0624458
0	4.48554	2.4722	0	0	-0.351756	0.278331
0.1	1.12481	-2.43927	-0.351756	0.278331	-0.0858621	-0.0726619
0.2	0.0737027	1.41322	-0.437618	0.205669	0.0011566	0.00727895
0.3	1.21791	1.54855	-0.436461	0.212948	0.00270879	0.121761
0.4	4.03433	0.654345	-0.433753	0.334709	0.320103	0.245546
0.5	2.75664	1.5366	-0.11365	0.580254	0.0094241	0.275503
0.6	3.91178	0.138568	-0.104226	0.855757	0.387428	0.0540315
0.7	4.49267	-1.2691	0.283203	0.909789	0.133494	-0.428975
0.8	1.19202	-2.16519	0.416697	0.480813	-0.0667538	-0.098757
0.9	3.83116	0.798869	0.349943	0.382056	0.26723	0.274529
1	1.62075	-2.32909	0.617173	0.656585	-0.111456	-0.117668
1.1	1.58488	-0.539979	0.505717	0.538917	0.135939	-0.0814817
1.2	0.470683	0.228948	0.641656	0.457435	0.0458401	0.0106823
1.3	1.39242	1.10563	0.687496	0.468117	0.0624607	0.124447
1.4	4.70077	-0.160976	0.749957	0.592564	0.463999	-0.0753446
1.5	0.0805706	-3.09379	1.21396	0.51722	-0.00804785	-0.00038503
1.6	1.79494	1.61051	1.20591	0.516835	-0.0071269	0.179353
1.7	2.97469	-2.65024	1.19878	0.696188	-0.262276	-0.140353
1.8	0.886086	0.487472	0.936505	0.555835	0.0782875	0.0415037
1.9	3.33258	-0.590504	1.01479	0.597339	0.276824	-0.185551
2	4.67967	-1.59873	1.29162	0.411787	-0.0130713	-0.467784
2.1	0.619612	-2.70269	1.27855	-0.0559969	-0.0560884	-0.0263304
2.2	2.84245	1.59151	1.22246	-0.0823273	-0.00588633	0.284184
2.3	3.90727	-2.85547	1.21657	0.201856	-0.374843	-0.110275
2.4	4.31042	-1.97788	0.841728	0.0915814	-0.170664	-0.395817
2.5	3.32454	3.02234	0.671064	-0.304236	-0.330093	0.0395507
2.6	0.735503	-2.72558	0.340971	-0.264685	-0.0672771	-0.0297226
2.7	2.10586	-1.51982	0.273694	-0.294408	0.0107295	-0.210313
2.8	2.08598	0.809075	0.284423	-0.50472	0.143967	0.150951
2.9	2.98314	-2.56667	0.428391	-0.353769	-0.250355	-0.162215
3	3.18842	-1.72151	0.178036	-0.515984	-0.0478723	-0.315228
3.1	3.49923	-0.666108	0.130164	-0.831212	0.275121	-0.216228
3.2	3.29699	2.96631	0.405284	-1.04744	-0.324648	0.0574949
3.3	0.632802	-1.25433	0.0806367	-0.989945	0.0196935	-0.0601377
3.4	1.2171	-1.6084	0.10033	-1.05008	-0.00457526	-0.121623
3.5	1.41303	2.62948	0.095755	-1.17171	-0.123175	0.0692416
3.6	1.4571	-0.764332	-0.0274199	-1.10246	0.10518	-0.10084
3.7	2.87324	-0.0400277	0.0777604	-1.2033	0.287094	-0.0114979
3.8	3.58509	0.250528	0.364854	-1.2148	0.347317	0.0888798
3.9	2.26506	-1.27751	0.712171	-1.12592	0.0654833	-0.216834
4	3.88035	-2.82517	0.777654	-1.34276	-0.36877	-0.120745
4.1	0.379106	0.800364	0.408884	-1.4635	0.0264027	0.027205
4.2	4.5719	-2.26942	0.435286	-1.4363	-0.294048	-0.350084
4.3	1.24689	-0.357243	0.141239	-1.78638	0.116816	-0.0436026
4.4	4.94178	0.159529	0.258055	-1.82998	0.487903	0.0785019
4.5	0.152385	2.33778	0.745958	-1.75148	-0.0105751	0.0109718
4.6	3.24337	2.27382	0.735383	-1.74051	-0.209693	0.247433
4.7	3.40424	2.26945	0.52569	-1.49307	-0.218957	0.260665
4.8	1.26708	-1.28307	0.306733	-1.23241	0.0359565	-0.1215
4.9	4.9149	2.71834	0.342689	-1.35391	-0.448119	0.201871
5	1.41672	1.13359	-0.105429	-1.15204	0.0599848	0.128346
5.1	1.39113	-2.05577	-0.0454446	-1.02369	-0.064853	-0.123071
5.2	0.311134	-1.36142	-0.110298	-1.14676	0.00646681	-0.0304339
5.3	2.6757	3.08069	-0.103831	-1.1772	-0.267074	0.016287
5.4	3.30223	1.29352	-0.370905	-1.16091	0.0903927	0.31761
5.5	3.84622	0.191124	-0.280512	-0.843301	0.377618	0.0730639
5.6	2.64037	-0.563575	0.0971062	-0.770237	0.223204	-0.141051
5.7	0.455303	-0.0905924	0.32031	-0.911288	0.0453436	-0.00411906
5.8	4.38278	0.711364	0.365654	-0.915407	0.331983	0.286137
5.9	4.50754	-3.00121	0.697637	-0.62927	-0.44632	-0.0630719
6	1.05185	0.714735	0.251317	-0.692342	0.079443	0.0689403
6.1	3.12561	1.22557	0.33076	-0.623402	0.105773	0.29412
6.2	0.948355	0.503726	0.436533	-0.329282	0.083056	0.0457764
6.3	4.87531	0.713458	0.519589	-0.283506	0.368624	0.319066
6.4	4.60319	-2.73551	0.888213	0.0355602	-0.422883	-0.181834
6.5	3.17762	-2.82417	0.46533	-0.146274	-0.301887	-0.0991788
6.6	0.728197	0.305056	0.163443	-0.245452	0.0694577	0.0218712
6.7	4.06452	1.18101	0.2329	-0.223581	0.154448	0.375964
6.8	3.18311	1.06305	0.387348	0.152383	0.154765	0.278155
6.9	1.19238	-2.27104	0.542113	0.430537	-0.0768373	-0.0911802
7	2.85485	-2.53034	0.465276	0.339357	-0.233792	-0.163839
7.1	2.85841	-0.457084	0.231483	0.175518	0.256497	-0.126151
7.2	0.420489	-1.65713	0.487981	0.0493673	-0.00362552	-0.0418923
7.3	0.210406	1.68514	0.484355	0.00747503	-0.00240054	0.0209033
7.4	3.03307	-2.63994	0.481955	0.0283783	-0.265936	-0.145853
7.5	4.99999	2.30448	0.216019	-0.117475	-0.334804	0.371356
7.6	3.5696	-0.394741	-0.118785	0.253881	0.329509	-0.137276
7.7	1.50845	-0.151284	0.210723	0.116605	0.149122	-0.0227336
7.8	4.04217	-0.768692	0.359846	0.0938715	0.290559	-0.28101
7.9	3.41598	-2.03544	0.650405	-0.187138	-0.15307	-0.305382
8	0.512649	2.70291	0.497335	-0.492521	-0.0464107	0.0217746
8.1	3.73089	-0.182847	0.450924	-0.470746	0.36687	-0.0678386
8.2	3.47466	-0.0433862	0.817794	-0.538585	0.347139	-0.0150705
8.3	0.0406935	-3.01386	1.16493	-0.553655	-0.0040362	-0.000518381
8.4	3.58651	0.271038	1.1609	-0.554173	0.345558	0.0960221
8.5	0.998573	-1.96265	1.50646	-0.458151	-0.038136	-0.0922883
8.6	4.99867	-2.89751	1.46832	-0.55044	-0.485051	-0.1208
8.7	2.15584	2.77641	0.983268	-0.67124	-0.201368	0.0769889
8.8	1.20108	2.80851	0.7819	-0.594251	-0.113506	0.0392702
8.9	2.07842	1.31848	0.668394	-0.554981	0.0518874	0.20126
9	4.96951	1.92752	0.720281	-0.35372	-0.173537	0.465666
9.1	2.23942	-2.20432	0.546745	0.111946	-0.13257	-0.180485
9.2	1.2052	1.47879	0.414174	-0.0685396	0.0110725	0.120011
9.3	2.04035	0.43769	0.425247	0.051471	0.184802	0.0864801
9.4	4.43354	0.925756	0.610048	0.137951	0.266558	0.354273
9.5	0.462579	-1.55679	0.876606	0.492224	0.00064799	-0.0462533
9.6	3.64054	1.15815	0.877254	0.445971	0.145999	0.333496
9.7	3.01923	-1.67277	1.02325	0.779467	-0.0307359	-0.300355
9.8	2.77172	1.92668	0.992517	0.479112	-0.0965722	0.259805
9.9	1.36016	2.17972	0.895945	0.738916	-0.0777992	0.111569
0	2.36326	-1.58783	0	0	-0.00402487	-0.236291
0.1	1.09653	0.406373	-0.00402487	-0.236291	0.100723	0.0433436
0.2	4.2757	2.58704	0.0966977	-0.192948	-0.363492	0.225143
0.3	3.81701	-1.50374	-0.266794	0.0321958	0.0255779	-0.380843
0.4	4.11483	-1.445	-0.241216	-0.348647	0.0516272	-0.408232
0.5	3.10597	-0.526386	-0.189589	-0.756879	0.268551	-0.156048
0.6	2.24694	1.15136	0.0789617	-0.912927	0.0915052	0.205217
0.7	3.88791	-2.42707	0.170467	-0.707709	-0.293695	-0.254759
0.8	0.277106	-2.46837	-0.123228	-0.962468	-0.0216645	-0.0172779
0.9	4.51741	-2.66114	-0.144893	-0.979746	-0.400597	-0.208788
1	0.311198	-3.13172	-0.54549	-1.18853	-0.0311183	-0.000307183
1.1	4.27605	-0.0833407	-0.576608	-1.18884	0.426121	-0.0355957
1.2	2.25968	0.85695	-0.150487	-1.22444	0.147951	0.170798
1.3	3.46128	3.08735	-0.00253599	-1.05364	-0.345619	0.0187656
1.4	2.23567	-1.49899	-0.348155	-1.03487	0.0160402	-0.222991
1.5	4.91214	-2.6988	-0.332115	-1.25786	-0.443841	-0.210467
1.6	0.776159	1.50817	-0.775956	-1.46833	0.00485785	0.0774637
1.7	1.73481	-0.908721	-0.771099	-1.39087	0.106648	-0.136827
1.8	0.880373	-0.464952	-0.664451	-1.52769	0.0786915	-0.0394741
1.9	4.92665	3.13109	-0.585759	-1.56717	-0.492638	0.00517447
2	0.658347	-2.18166	-1.0784	-1.56199	-0.0377613	-0.0539286
2.1	3.42641	1.43612	-1.11616	-1.61592	0.0460077	0.339539
2.2	4.4031	-2.18091	-1.07015	-1.27638	-0.252281	-0.360869
2.3	4.66686	2.02716	-1.32243	-1.63725	-0.205664	0.418925
2.4	1.45431	-0.718012	-1.5281	-1.21833	0.109526	-0.0956774
2.5	1.3211	0.617836	-1.41857	-1.31401	0.107688	0.076528
2.6	2.50972	1.96304	-1.31088	-1.23748	-0.0959363	0.231912
2.7	2.10588	0.788733	-1.40682	-1.00557	0.148411	0.149404
2.8	0.17728	2.20064	-1.25841	-0.856161	-0.0104421	0.0143263
2.9	2.09597	2.25655	-1.26885	-0.841835	-0.132729	0.162215
3	3.79881	-3.10116	-1.40158	-0.67962	-0.379571	-0.0153545
3.1	0.348352	-0.577544	-1.78115	-0.694975	0.0291851	-0.0190189
3.2	4.93137	2.4198	-1.75196	-0.713993	-0.370159	0.325832
3.3	1.15896	2.31799	-2.12212	-0.388161	-0.0787609	0.0850209
3.4	4.29546	-2.48968	-2.20088	-0.30314	-0.341458	-0.260608
3.5	3.43661	1.46811	-2.54234	-0.563748	0.0352277	0.34185
3.6	4.31408	-1.81733	-2.50711	-0.221898	-0.105282	-0.418364
3.7	1.40094	0.380446	-2.6124	-0.640262	0.130077	0.0520217
3.8	1.2118	1.39148	-2.48232	-0.58824	0.0216136	0.119237
3.9	0.203021	-2.11225	-2.46071	-0.469003	-0.0104633	-0.0173981
4	1.46359	2.68375	-2.47117	-0.486401	-0.131285	0.0646925
4.1	0.863874	0.171234	-2.60245	-0.421709	0.085124	0.0147203
4.2	3.14426	1.41726	-2.51733	-0.406988	0.0480877	0.310727
4.3	2.86176	1.35926	-2.46924	-0.0962612	0.0600861	0.279797
4.4	1.86617	-0.253695	-2.40916	0.183536	0.180643	-0.0468375
4.5	0.323085	-0.266397	-2.22851	0.136698	0.0311688	-0.00850544
4.6	3.94048	-0.0974222	-2.19734	0.128193	0.392179	-0.0383283
4.7	4.17146	-0.504952	-1.80516	0.0898642	0.365085	-0.201801
4.8	0.309966	-0.287241	-1.44008	-0.111936	0.0297266	-0.00878157
4.9	2.78626	-0.640301	-1.41035	-0.120718	0.223434	-0.166461
5	2.00841	0.571682	-1.18692	-0.287179	0.168906	0.108664
5.1	4.1049	1.80147	-1.01801	-0.178515	-0.0938525	0.399617
5.2	2.94405	-2.4777	-1.11187	0.221102	-0.231872	-0.181409
5.3	2.22063	1.70045	-1.34374	0.0396925	-0.028711	0.220199
5.4	2.38216	1.5574	-1.37245	0.259892	0.00319122	0.238194
5.5	2.98152	-2.68138	-1.36926	0.498086	-0.267132	-0.132421
5.6	3.20344	2.18114	-1.63639	0.365665	-0.183606	0.262505
5.7	2.25158	-0.0609644	-1.82	0.62817	0.22474	-0.0137181
5.8	2.50199	3.08919	-1.59526	0.614452	-0.249856	0.0131054
5.9	4.32403	2.64898	-1.84511	0.627558	-0.380991	0.204494
6	4.47765	0.182874	-2.2261	0.832052	0.440298	0.0814288
6.1	0.686738	-0.37293	-1.7858	0.913481	0.0639534	-0.025021
6.2	2.98467	-1.74021	-1.72185	0.88846	-0.0503232	-0.294194
6.3	0.607274	0.384117	-1.77217	0.594266	0.0563022	0.022757
6.4	2.0535	-1.21671	-1.71587	0.617023	0.0712018	-0.192611
6.5	1.22977	-2.74869	-1.64467	0.424412	-0.113606	-0.0470838
6.6	1.69886	1.17615	-1.75828	0.377328	0.065318	0.156827
6.7	2.20814	-0.691085	-1.69296	0.534155	0.170149	-0.140741
6.8	3.63447	-2.62588	-1.52281	0.393414	-0.316177	-0.179236
6.9	4.38539	3.13539	-1.83899	0.214178	-0.43853	0.00272212
7	4.9698	2.05372	-2.27752	0.2169	-0.230783	0.440146
7.1	2.26689	-1.89782	-2.5083	0.657046	-0.072818	-0.214675
7.2	4.76373	-2.53192	-2.58112	0.44237	-0.390548	-0.27277
7.3	0.718606	-2.37592	-2.97166	0.1696	-0.0518057	-0.0498008
7.4	1.16017	0.692806	-3.02347	0.119799	0.0892699	0.0740998
7.5	0.577714	-1.60881	-2.9342	0.193899	-0.00219571	-0.0577297
7.6	2.52444	-3.06287	-2.9364	0.136169	-0.251662	-0.0198526
7.7	3.5617	-0.467108	-3.18806	0.116317	0.318015	-0.160386
7.8	4.34875	1.59165	-2.87004	-0.044069	-0.00906927	0.43478
7.9	3.75872	-2.23468	-2.87911	0.390712	-0.231605	-0.296039
8	1.25122	-1.3798	-3.11072	0.0946728	0.0237532	-0.122847
8.1	0.830452	1.39482	-3.08696	-0.0281743	0.0145388	0.0817626
8.2	0.71265	1.68564	-3.07243	0.0535883	-0.0081667	0.0707955
8.3	3.48173	0.289269	-3.08059	0.124384	0.333708	0.0993171
8.4	1.06341	2.32209	-2.74688	0.223701	-0.0725864	0.0777144
8.5	2.28368	-0.765066	-2.81947	0.301415	0.16473	-0.158164
8.6	1.49943	-1.9897	-2.65474	0.143251	-0.0609903	-0.136979
8.7	2.44659	2.12378	-2.71573	0.00627219	-0.128503	0.208194
8.8	2.01438	1.73261	-2.84423	0.214467	-0.0324541	0.198806
8.9	0.546312	-2.41132	-2.87669	0.413273	-0.0406998	-0.036443
9	2.82608	-2.28137	-2.91739	0.37683	-0.184337	-0.214213
9.1	0.319469	0.914552	-3.10172	0.162617	0.0194923	0.0253112
9.2	2.03642	-0.300442	-3.08223	0.187928	0.19452	-0.0602662
9.3	4.39935	0.610765	-2.88771	0.127662	0.360399	0.2523
9.4	4.78941	0.279241	-2.52731	0.379962	0.460389	0.132009
9.5	3.51019	-1.42713	-2.06692	0.511971	0.0502577	-0.347403
9.6	1.87363	-2.63991	-2.01667	0.164568	-0.164274	-0.0901037
9.7	1.56703	-1.10038	-2.18094	0.0744644	0.0710271	-0.139682
9.8	2.74048	-2.78159	-2.10991	-0.0652173	-0.25648	-0.0965419
9.9	4.17959	1.63427	-2.36639	-0.161759	-0.0265063	0.417118
0	1.97098	-0.132234	0	0	0.195377	-0.0259872
0.1	4.87154	-1.9016	0.195377	-0.0259872	-0.158228	-0.460742
0.2	1.57215	-2.9183	0.0371489	-0.486729	-0.153312	-0.0348137
0.3	0.504751	-2.47217	-0.116164	-0.521542	-0.0395817	-0.0313214
0.4	4.11189	-2.66389	-0.155745	-0.552864	-0.365158	-0.18904
0.5	0.70718	3.12159	-0.520903	-0.741903	-0.0707039	0.0014148
0.6	4.80566	-1.60986	-0.591607	-0.740489	-0.0187675	-0.4802
0.7	4.23241	-1.45343	-0.610375	-1.22069	0.0495602	-0.420329
0.8	0.319057	-1.67369	-0.560815	-1.64102	-0.00327721	-0.031737
0.9	0.589119	-3.04134	-0.564092	-1.67275	-0.0586161	-0.00589594
1	4.35188	-0.294449	-0.622708	-1.67865	0.416459	-0.126297
1.1	4.80997	-2.47757	-0.206249	-1.80495	-0.378795	-0.296433
1.2	0.995504	-0.295841	-0.585045	-2.10138	0.0952257	-0.0290234
1.3	2.05819	-1.04316	-0.489819	-2.1304	0.103628	-0.177827
1.4	4.58614	-1.27522	-0.386191	-2.30823	0.133589	-0.438727
1.5	4.16226	-1.77286	-0.252602	-2.74696	-0.0835344	-0.407757
1.6	2.32168	-1.95558	-0.336136	-3.15472	-0.087147	-0.215192
1.7	4.18919	0.376971	-0.423283	-3.36991	0.389504	0.154207
1.8	4.27811	2.07318	-0.0337795	-3.2157	-0.205999	0.374949
1.9	0.385808	1.56671	-0.239778	-2.84075	0.000157491	0.0385805
2	2.58838	-1.94698	-0.239621	-2.80217	-0.0950899	-0.240739
2.1	1.16755	-3.09391	-0.334711	-3.04291	-0.116622	-0.00556541
2.2	1.55965	-1.14946	-0.451332	-3.04848	0.0637859	-0.142325
2.3	2.97185	-2.00725	-0.387546	-3.1908	-0.125629	-0.269325
2.4	1.73562	-0.709411	-0.513176	-3.46013	0.131689	-0.113056
2.5	1.21316	0.0373202	-0.381486	-3.57318	0.121232	0.0045265
2.6	4.5912	-2.68629	-0.260254	-3.56866	-0.412349	-0.201891
2.7	2.58764	1.71783	-0.672603	-3.77055	-0.0379094	0.255972
2.8	2.66973	-2.78616	-0.710513	-3.51457	-0.250286	-0.0929043
2.9	1.77095	2.79368	-0.960799	-3.60748	-0.166484	0.0603783
3	1.51005	0.0960498	-1.12728	-3.5471	0.150309	0.0144817
3.1	2.49939	1.34144	-0.976975	-3.53262	0.0568248	0.243393
3.2	4.91265	-1.39011	-0.92015	-3.28922	0.0882809	-0.483268
3.3	4.64063	1.99542	-0.831869	-3.77249	-0.191184	0.422851
3.4	2.23525	3.03082	-1.02305	-3.34964	-0.222155	0.0247095
3.5	3.48287	1.513	-1.24521	-3.32493	0.0201198	0.347705
3.6	2.45035	-0.734196	-1.22509	-2.97723	0.181907	-0.164171
3.7	0.650846	-0.12412	-1.04318	-3.1414	0.0645839	-0.00805758
3.8	3.47863	-2.98769	-0.978598	-3.14946	-0.343752	-0.0533251
3.9	2.27645	0.148452	-1.32235	-3.20278	0.225141	0.0336704
4	3.04694	1.26548	-1.09721	-3.16911	0.0915886	0.290602
4.1	1.55966	-0.511878	-1.00562	-2.87851	0.135976	-0.0763947
4.2	2.26951	-0.0421753	-0.869644	-2.9549	0.226749	-0.00956889
4.3	0.147822	-0.975397	-0.642895	-2.96447	0.00829045	-0.0122386
4.4	4.94517	1.86011	-0.634605	-2.97671	-0.141084	0.473965
4.5	0.730148	-2.57484	-0.775689	-2.50275	-0.0615987	-0.0392015
4.6	1.74719	-2.69877	-0.837287	-2.54195	-0.157866	-0.0748661
4.7	4.10748	2.84839	-0.995153	-2.61681	-0.393219	0.118713
4.8	0.178065	-1.14076	-1.38837	-2.4981	0.00742359	-0.0161852
4.9	2.78353	1.24865	-1.38095	-2.51429	0.0881279	0.264034
5	0.00163286	1.43108	-1.29282	-2.25025	2.27392e-05	0.000161695
5.1	4.8305	-1.97965	-1.2928	-2.25009	-0.192039	-0.443236
5.2	2.32237	-2.4701	-1.48484	-2.69332	-0.181817	-0.144488
5.3	4.71847	-1.42892	-1.66665	-2.83781	0.0667185	-0.467106
5.4	4.35359	0.904083	-1.59994	-3.30492	0.269229	0.342131
5.5	0.429775	-1.40364	-1.33071	-2.96279	0.00715067	-0.0423785
5.6	4.6799	0.180213	-1.32356	-3.00517	0.460411	0.083882
5.7	4.20495	-1.53491	-0.863145	-2.92128	0.0150865	-0.420224
5.8	4.11357	1.14269	-0.848059	-3.34151	0.170772	0.374234
5.9	1.48347	-0.634718	-0.677286	-2.96727	0.119455	-0.0879625
6	1.35519	-1.07833	-0.557832	-3.05524	0.0640742	-0.119415
6.1	2.80971	-2.1073	-0.493757	-3.17465	-0.143613	-0.241496
6.2	1.16151	2.11608	-0.63737	-3.41615	-0.060243	0.0993071
6.3	4.33181	1.49149	-0.697613	-3.31684	0.0343176	0.431819
6.4	0.7191	2.94258	-0.663295	-2.88502	-0.0704906	0.014217
6.5	4.04875	-1.38937	-0.733786	-2.8708	0.0730518	-0.39823
6.6	3.60053	-2.73733	-0.660734	-3.26903	-0.331029	-0.141624
6.7	4.56668	1.22464	-0.991764	-3.41066	0.154942	0.42958
6.8	1.0012	-1.89068	-0.836822	-2.98108	-0.0314836	-0.0950407
6.9	2.42817	1.61469	-0.868306	-3.07612	-0.0106544	0.242583
7	4.2702	-2.40606	-0.87896	-2.83354	-0.316624	-0.286522
7.1	1.45233	0.390456	-1.19558	-3.12006	0.134302	0.0552769
7.2	0.659166	-1.23917	-1.06128	-3.06478	0.0214614	-0.062325
7.3	0.920744	-2.46052	-1.03982	-3.12711	-0.0715324	-0.0579725
7.4	1.05482	-2.04967	-1.11135	-3.18508	-0.0486035	-0.093617
7.5	3.76101	2.36827	-1.15996	-3.2787	-0.269134	0.262714
7.6	1.83044	0.71943	-1.42909	-3.01598	0.137683	0.120618
7.7	4.73896	-1.01291	-1.29141	-2.89536	0.250876	-0.402043
7.8	2.68484	1.99371	-1.04053	-3.29741	-0.110191	0.24483
7.9	1.081	2.12839	-1.15072	-3.05258	-0.0572005	0.0917269
8	2.00367	2.93067	-1.20792	-2.96085	-0.195927	0.0419498
8.1	2.10571	-0.29849	-1.40385	-2.9189	0.20126	-0.0619241
8.2	3.8076	2.09239	-1.20259	-2.98082	-0.189719	0.330128
8.3	3.29559	-2.70106	-1.39231	-2.6507	-0.298094	-0.140531
8.4	1.80077	0.0262815	-1.6904	-2.79123	0.180015	0.00473216
8.5	2.0472	2.03315	-1.51039	-2.7865	-0.0913167	0.183225
8.6	2.77637	0.873226	-1.60171	-2.60327	0.178342	0.212782
8.7	1.96454	-3.00571	-1.42336	-2.39049	-0.194643	-0.0266129
8.8	3.35417	0.294202	-1.61801	-2.4171	0.321006	0.097263
8.9	3.57127	-0.386705	-1.297	-2.31984	0.330756	-0.134686
9	2.89868	-2.75552	-0.966246	-2.45452	-0.268533	-0.10915
9.1	0.288072	1.96206	-1.23478	-2.56367	-0.0109859	0.0266301
9.2	2.17727	0.458246	-1.24576	-2.53704	0.195264	0.0963172
9.3	4.19615	-1.55554	-1.0505	-2.44073	0.00640169	-0.419566
9.4	0.484148	-2.82636	-1.0441	-2.86029	-0.0460292	-0.0150104
9.5	2.95261	3.0894	-1.09013	-2.8753	-0.294859	0.0154044
9.6	0.351339	1.99523	-1.38499	-2.8599	-0.0144682	0.0320166
9.7	4.12883	-1.48778	-1.39945	-2.82788	0.0342354	-0.411461
9.8	3.06657	-1.95653	-1.36522	-3.23934	-0.115376	-0.284124
9.9	0.647575	0.111265	-1.4806	-3.52347	0.0643554	0.00718811
0	4.42056	-3.10747	0	0	-0.441799	-0.0150813
0.1	3.32029	-0.851365	-0.441799	-0.0150813	0.218793	-0.249746
0.2	4.50694	1.0068	-0.223006	-0.264827	0.240926	0.380893
0.3	4.40033	-2.82206	0.0179198	0.116066	-0.417759	-0.138224
0.4	4.77919	-1.57259	-0.39984	-0.0221581	-0.000856703	-0.477918
0.5	0.965541	-1.93399	-0.400696	-0.500076	-0.0343019	-0.0902556
0.6	4.59484	-0.449118	-0.434998	-0.590332	0.413917	-0.199495
0.7	2.72471	2.83588	-0.0210816	-0.789826	-0.259837	0.0820055
0.8	0.520001	1.64885	-0.280919	-0.707821	-0.00405462	0.0518418
0.9	1.67194	0.444333	-0.284973	-0.655979	0.150959	0.0718694
1	0.894775	0.102287	-0.134014	-0.584109	0.0890098	0.00913647
1.1	0.697707	2.62525	-0.0450045	-0.574973	-0.0606749	0.0344458
1.2	3.29864	0.928059	-0.105679	-0.540527	0.197717	0.264042
1.3	1.66478	-2.19183	0.0920375	-0.276485	-0.0968695	-0.135393
1.4	1.76219	2.51733	-0.00483196	-0.411877	-0.142983	0.102999
1.5	3.45787	1.5423	-0.147815	-0.308878	0.00985225	0.345647
1.6	2.23903	-0.707076	-0.137963	0.0367689	0.170226	-0.145451
1.7	1.03521	0.480591	0.0322629	-0.108682	0.0917946	0.0478582
1.8	3.20657	3.11953	0.124057	-0.0608235	-0.320578	0.00707545
1.9	4.38935	0.880085	-0.196521	-0.0537481	0.279639	0.338328
2	4.95655	-0.735647	0.0831181	0.28458	0.367477	-0.332618
2.1	0.93933	-3.13916	0.450595	-0.0480378	-0.0939327	-0.000228756
2.2	3.71496	-1.28695	0.356662	-0.0482666	0.104036	-0.356632
2.3	2.4427	2.27798	0.460698	-0.404898	-0.1587	0.185693
2.4	2.4767	-2.58717	0.301998	-0.219205	-0.21057	-0.130387
2.5	3.24387	1.44032	0.091428	-0.349592	0.0422062	0.32163
2.6	3.48992	1.48765	0.133634	-0.0279618	0.0289848	0.347786
2.7	4.29962	0.103485	0.162619	0.319824	0.427662	0.0444152
2.8	3.52449	1.06627	0.590281	0.36424	0.170372	0.308535
2.9	3.50625	2.80738	0.760653	0.672775	-0.331224	0.115015
3	1.03156	0.024413	0.429429	0.78779	0.103125	0.00251809
3.1	1.10269	2.61312	0.532554	0.790308	-0.0952256	0.055599
3.2	3.74411	-1.92124	0.437328	0.845907	-0.128539	-0.351655
3.3	1.99682	0.571285	0.308789	0.494252	0.167974	0.107971
3.4	2.71693	0.636868	0.476763	0.602223	0.218431	0.16157
3.5	1.76519	2.82353	0.695194	0.763793	-0.167665	0.0552025
3.6	0.515011	-0.546182	0.527529	0.818996	0.0440084	-0.0267511
3.7	3.27189	2.63761	0.571537	0.792245	-0.286509	0.158004
3.8	3.29525	-2.76823	0.285028	0.950248	-0.306823	-0.120194
3.9	1.53614	-2.9933	-0.0217944	0.830055	-0.151928	-0.0226963
4	1.30291	0.253923	-0.173723	0.807358	0.126113	0.0327295
4.1	1.19007	1.03616	-0.0476092	0.840088	0.0606372	0.1024
4.2	1.00701	2.29709	0.013028	0.942488	-0.0668758	0.0752882
4.3	2.74086	-0.737113	-0.0538478	1.01778	0.202936	-0.184228
4.4	1.60267	2.02619	0.149089	0.833549	-0.0704874	0.143934
4.5	3.32286	1.5402	0.0786011	0.977483	0.0101646	0.33213
4.6	4.98254	0.754279	0.0887657	1.30961	0.36311	0.341186
4.7	2.54734	-1.51734	0.451876	1.6508	0.0136108	-0.25437
4.8	3.16967	-0.79477	0.465486	1.39643	0.222019	-0.22622
4.9	0.232765	-1.19962	0.687505	1.17021	0.00844262	-0.0216914
5	0.218887	-1.50825	0.695948	1.14852	0.00136814	-0.0218459
5.1	0.251024	1.11604	0.697316	1.12667	0.0110261	0.0225511
5.2	2.55578	-3.13245	0.708342	1.14922	-0.255568	-0.00233554
5.3	1.80273	-0.514154	0.452775	1.14689	0.156965	-0.088658
5.4	0.846412	-2.7546	0.60974	1.05823	-0.0783818	-0.0319442
5.5	2.39347	-0.647267	0.531358	1.02629	0.190935	-0.144328
5.6	3.6282	0.158618	0.722293	0.881957	0.358265	0.0573088
5.7	1.27501	-2.07901	1.08056	0.939266	-0.0620443	-0.111387
5.8	4.41232	-1.27363	1.01851	0.827879	0.129197	-0.421893
5.9	0.103554	-0.258556	1.14771	0.405986	0.0100112	-0.00264773
6	1.60529	0.374321	1.15772	0.403339	0.149414	0.058696
6.1	0.648183	1.60229	1.30714	0.462035	-0.0020411	0.0647861
6.2	3.98369	2.03689	1.30509	0.526821	-0.179027	0.355875
6.3	4.03953	0.755728	1.12607	0.882696	0.293986	0.277039
6.4	0.126493	-2.94669	1.42005	1.15973	-0.0124098	-0.0024498
6.5	3.52348	-1.82607	1.40764	1.15728	-0.0889713	-0.34093
6.6	4.20089	-2.86742	1.31867	0.816355	-0.404399	-0.113739
6.7	0.604059	0.130625	0.914274	0.702615	0.0598913	0.00786809
6.8	3.79009	3.01366	0.974165	0.710483	-0.375912	0.0483545
6.9	0.713499	-0.385057	0.598253	0.758838	0.0661254	-0.0267998
7	4.2897	0.896196	0.664379	0.732038	0.267928	0.335007
7.1	2.75568	0.7879	0.932307	1.06704	0.194368	0.195343
7.2	3.89412	1.13195	1.12667	1.26239	0.165459	0.352512
7.3	1.97346	1.51683	1.29213	1.6149	0.0106457	0.197058
7.4	0.26408	-2.29557	1.30278	1.81196	-0.0175077	-0.0197703
7.5	0.0745758	-1.16819	1.28527	1.79219	0.00292204	-0.00686128
7.6	3.06549	0.65405	1.28819	1.78533	0.243285	0.186506
7.7	4.32163	2.03654	1.53148	1.97183	-0.194079	0.386132
7.8	3.20286	-2.21083	1.3374	2.35796	-0.191281	-0.256895
7.9	3.46536	0.112581	1.14612	2.10107	0.344342	0.038931
8	0.812436	-0.324389	1.49046	2.14	0.0770064	-0.0258947
8.1	0.00636081	-1.14887	1.56747	2.11411	0.000260486	-0.000580298
8.2	1.69005	0.071406	1.56773	2.11353	0.168574	0.0120577
8.3	4.97747	-2.02267	1.7363	2.12558	-0.217344	-0.447787
8.4	2.62028	2.67355	1.51896	1.6778	-0.233848	0.118212
8.5	4.9574	-1.39089	1.28511	1.79601	0.0887063	-0.487739
8.6	0.0652832	2.24463	1.37382	1.30827	-0.00407358	0.00510146
8.7	2.70455	1.58887	1.36974	1.31337	-0.00488905	0.270411
8.8	3.84208	0.0377022	1.36485	1.58378	0.383935	0.0144821
8.9	1.25492	-0.213409	1.74879	1.59826	0.122645	-0.0265784
9	3.79379	2.02853	1.87143	1.57168	-0.167652	0.340325
9.1	1.34174	2.90713	1.70378	1.91201	-0.130503	0.0311708
9.2	1.47297	-1.59247	1.57328	1.94318	-0.0031929	-0.147263
9.3	1.28096	-1.08719	1.57009	1.79592	0.0595608	-0.113407
9.4	0.680479	0.675664	1.62965	1.68251	0.0530973	0.0425582
9.5	0.86079	2.65745	1.68274	1.72507	-0.0761863	0.0400655
9.6	1.26126	-0.344592	1.60656	1.76513	0.118712	-0.0426071
9.7	0.884848	-0.0835492	1.72527	1.72253	0.0881762	-0.00738424
9.8	1.64194	-1.95059	1.81345	1.71514	-0.0608707	-0.152494
9.9	2.72753	2.80442	1.75258	1.56265	-0.257395	0.0902334
0	4.25608	0.0354847	0	0	0.42534	0.0150994
0.1	1.29557	1.80377	0.42534	0.0150994	-0.0299115	0.126056
0.2	0.932498	0.956817	0.395429	0.141156	0.0537235	0.0762188
0.3	0.673865	3.07423	0.449152	0.217375	-0.0672337	0.00453591
0.4	3.99998	-0.281452	0.381919	0.221911	0.384259	-0.1111
0.5	2.8711	0.724494	0.766178	0.110811	0.214998	0.190284
0.6	2.79446	0.271962	0.981176	0.301095	0.269176	0.0750655
0.7	1.85848	2.26636	1.25035	0.37616	-0.119095	0.142673
0.8	2.19413	-2.1892	1.13126	0.518833	-0.127201	-0.178779
0.9	0.630518	2.57339	1.00406	0.340055	-0.0531444	0.0339295
1	4.73207	-2.62703	0.950911	0.373984	-0.411929	-0.232892
1.1	2.82562	-1.47183	0.538982	0.141092	0.0279199	-0.281179
1.2	4.16414	0.547757	0.566901	-0.140087	0.355491	0.216858
1.3	4.1804	1.3579	0.922392	0.0767706	0.0883295	0.408602
1.4	4.15217	1.31635	1.01072	0.485373	0.104515	0.401848
1.5	4.22291	2.34894	1.11524	0.887221	-0.29643	0.300765
1.6	4.0858	2.01555	0.818807	1.18799	-0.175784	0.368833
1.7	4.17068	-1.38525	0.643022	1.55682	0.0769403	-0.40991
1.8	3.47822	1.57887	0.719963	1.14691	-0.00280947	0.34781
1.9	1.98446	2.61555	0.717153	1.49472	-0.171616	0.0996429
2	0.692108	-0.607618	0.545538	1.59436	0.0568228	-0.0395134
2.1	4.48271	-1.97237	0.60236	1.55485	-0.175216	-0.41261
2.2	3.6184	2.94088	0.427145	1.14224	-0.354576	0.0721391
2.3	0.877628	-2.96239	0.0725692	1.21438	-0.0863574	-0.0156432
2.4	2.65121	-0.578506	-0.0137883	1.19873	0.221981	-0.144961
2.5	4.64339	2.5968	0.208192	1.05377	-0.397118	0.240641
2.6	1.46599	1.87235	-0.188926	1.29441	-0.0435411	0.139984
2.7	3.69538	1.62728	-0.232467	1.4344	-0.0208601	0.368949
2.8	0.899261	2.76278	-0.253327	1.80335	-0.0835508	0.033256
2.9	3.21811	1.9776	-0.336878	1.8366	-0.127333	0.295548
3	2.00989	-1.7797	-0.46421	2.13215	-0.041683	-0.196619
3.1	3.12549	-0.158132	-0.505893	1.93553	0.30865	-0.0492182
3.2	4.2756	1.54586	-0.197244	1.88631	0.0106614	0.427427
3.3	2.68149	1.2895	-0.186582	2.31374	0.0744398	0.25761
3.4	2.54016	-0.957567	-0.112142	2.57135	0.146189	-0.207733
3.5	3.64879	0.934731	0.0340467	2.36362	0.216751	0.293523
3.6	3.86645	0.846279	0.250798	2.65714	0.256258	0.289527
3.7	0.219285	0.341198	0.507056	2.94667	0.0206645	0.00733764
3.8	4.42195	-2.56823	0.52772	2.95401	-0.371481	-0.239873
3.9	3.0015	-2.25989	0.15624	2.71413	-0.190847	-0.231662
4	4.50556	2.84661	-0.0346069	2.48247	-0.431095	0.130988
4.1	3.71276	-3.07543	-0.465702	2.61346	-0.370463	-0.0245453
4.2	3.522	2.25516	-0.836166	2.58891	-0.222655	0.272891
4.3	0.495632	0.052215	-1.05882	2.86181	0.0494957	0.00258677
4.4	4.99004	-2.48067	-1.00932	2.86439	-0.393927	-0.30631
4.5	0.621376	0.95074	-1.40325	2.55808	0.036107	0.0505705
4.6	1.09464	2.36046	-1.36714	2.60865	-0.0777321	0.0770718
4.7	2.44353	-1.19654	-1.44488	2.68572	0.0893315	-0.227439
4.8	0.739595	-1.44869	-1.35555	2.45828	0.00900874	-0.0734088
4.9	0.381071	0.0410366	-1.34654	2.38488	0.038075	0.00156334
5	3.68758	-2.72687	-1.30846	2.38644	-0.337498	-0.148584
5.1	4.75376	2.29373	-1.64596	2.23785	-0.314502	0.35647
5.2	3.58337	-1.40761	-1.96046	2.59432	0.0582156	-0.353577
5.3	2.022	-1.38023	-1.90225	2.24075	0.038299	-0.19854
5.4	1.01697	0.131958	-1.86395	2.04221	0.100813	0.0133808
5.5	3.199	2.5774	-1.76313	2.05559	-0.270322	0.171061
5.6	1.87614	-2.51438	-2.03346	2.22665	-0.151904	-0.110109
5.7	4.70253	2.26735	-2.18536	2.11654	-0.301703	0.360712
5.8	4.13925	-0.446017	-2.48706	2.47725	0.373432	-0.178557
5.9	3.48397	0.042786	-2.11363	2.2987	0.348078	0.0149019
6	1.63383	2.9798	-1.76555	2.3136	-0.16125	0.0263184
6.1	4.2372	-1.42443	-1.9268	2.33992	0.061797	-0.41919
6.2	0.7731	-2.12144	-1.86501	1.92073	-0.0404516	-0.0658826
6.3	0.230242	-2.55094	-1.90546	1.85484	-0.0191234	-0.0128222
6.4	4.89079	2.59215	-1.92458	1.84202	-0.417094	0.255404
6.5	2.38549	-0.980862	-2.34168	2.09743	0.132707	-0.198229
6.6	2.38723	-0.423278	-2.20897	1.8992	0.217655	-0.0980555
6.7	0.938785	1.33338	-1.99131	1.80114	0.0220792	0.0912452
6.8	2.2384	-2.48035	-1.96924	1.89239	-0.176661	-0.137459
6.9	3.25224	-3.02816	-2.1459	1.75493	-0.323134	-0.0368126
7	1.90641	1.59702	-2.46903	1.71812	-0.00499842	0.190575
7.1	3.88131	1.20837	-2.47403	1.90869	0.137608	0.362918
7.2	2.07509	-2.02142	-2.33642	2.27161	-0.090376	-0.186795
7.3	2.45457	2.17251	-2.4268	2.08481	-0.138941	0.202347
7.4	3.435	2.32577	-2.56574	2.28716	-0.235389	0.250168
7.5	3.97299	0.38123	-2.80113	2.53733	0.368776	0.14782
7.6	3.60415	-1.58669	-2.43235	2.68515	-0.00572937	-0.36037
7.7	2.98614	-0.248598	-2.43808	2.32478	0.289434	-0.0734726
7.8	2.53824	1.51747	-2.14865	2.25131	0.0135294	0.253463
7.9	0.841124	0.208093	-2.13512	2.50477	0.0822978	0.0173771
8	3.41104	1.88021	-2.05282	2.52215	-0.103866	0.324906
8.1	3.23651	-1.44185	-2.15669	2.84705	0.0416178	-0.320964
8.2	4.47172	1.36758	-2.11507	2.52609	0.0902471	0.43797
8.3	3.92513	1.18853	-2.02482	2.96406	0.146416	0.364182
8.4	4.27136	2.87315	-1.87841	3.32824	-0.411839	0.113288
8.5	3.22559	-0.00447777	-2.29024	3.44153	0.322556	-0.00144434
8.6	3.68045	-2.95257	-1.96769	3.44008	-0.36149	-0.0691536
8.7	1.25713	2.97273	-2.32918	3.37093	-0.123925	0.0211274
8.8	1.78974	0.969514	-2.4531	3.39206	0.101246	0.147584
8.9	3.22875	-2.65654	-2.35186	3.53964	-0.285631	-0.150543
9	3.07749	1.03027	-2.63749	3.3891	0.158363	0.263876
9.1	0.799176	0.619052	-2.47913	3.65298	0.0650872	0.0463732
9.2	2.27992	-1.24767	-2.41404	3.69935	0.0723953	-0.216193
9.3	0.233327	-1.75856	-2.34164	3.48316	-0.00435523	-0.0229226
9.4	2.31358	2.02859	-2.346	3.46023	-0.102253	0.207536
9.5	2.21388	-0.634273	-2.44825	3.66777	0.178329	-0.131193
9.6	3.5047	2.17133	-2.26992	3.53658	-0.198046	0.289149
9.7	1.77152	0.755241	-2.46797	3.82573	0.128986	0.121431
9.8	3.29287	-0.00206308	-2.33898	3.94716	0.329287	-0.000679346
9.9	0.292256	1.84298	-2.0097	3.94648	-0.00785435	0.0281499
0	3.46509	-2.65363	0	0	-0.306069	-0.162452
0.1	3.06318	-0.210397	-0.306069	-0.162452	0.299564	-0.0639739
0.2	2.16561	0.331416	-0.00650506	-0.226426	0.204776	0.0704649
0.3	3.47796	1.91087	0.198271	-0.155961	-0.116009	0.327878
0.4	3.27966	-3.07264	0.082262	0.171918	-0.327187	-0.0225976
0.5	0.39972	-2.35054	-0.244925	0.14932	-0.0281041	-0.028424
0.6	4.48524	1.66173	-0.273029	0.120896	-0.0407276	0.446671
0.7	3.82441	-0.355379	-0.313757	0.567567	0.358545	-0.133069
0.8	1.81696	-1.08067	0.0447877	0.434498	0.0855302	-0.160306
0.9	2.66439	1.2601	0.130318	0.274192	0.0814553	0.253683
1	4.16231	1.55378	0.211773	0.527875	0.00708407	0.416171
1.1	2.85102	2.7927	0.218857	0.944046	-0.267926	0.0974633
1.2	1.85769	1.13747	-0.0490687	1.04151	0.0780024	0.168599
1.3	0.317971	2.07509	0.0289337	1.21011	-0.0153641	0.0278388
1.4	3.24605	1.74535	0.0135696	1.23795	-0.0563738	0.319672
1.5	1.49285	-1.05778	-0.0428042	1.55762	0.0732699	-0.130067
1.6	1.84052	0.695238	0.0304657	1.42755	0.141334	0.117898
1.7	2.61731	-0.948653	0.1718	1.54545	0.152531	-0.212691
1.8	2.6051	-2.40739	0.324331	1.33276	-0.193394	-0.174541
1.9	3.07459	2.61364	0.130937	1.15822	-0.265595	0.154888
2	4.39677	-1.29113	-0.134659	1.31311	0.121366	-0.422594
2.1	2.44274	-2.93973	-0.013293	0.890512	-0.239314	-0.0489766
2.2	0.98289	-1.30701	-0.252607	0.841535	0.0256277	-0.0948891
2.3	0.814305	-1.91035	-0.226979	0.746646	-0.027122	-0.0767811
2.4	1.17534	-1.87322	-0.254101	0.669865	-0.0350062	-0.1122
2.5	2.98885	-0.864387	-0.289107	0.557665	0.194008	-0.227362
2.6	2.41895	0.871499	-0.095099	0.330303	0.155703	0.185121
2.7	2.6614	-0.211902	0.060604	0.515424	0.260187	-0.0559744
2.8	1.25542	-2.52658	0.320791	0.45945	-0.102538	-0.0724335
2.9	0.540527	1.34493	0.218253	0.387016	0.012105	0.0526798
3	0.517279	-1.92372	0.230358	0.439696	-0.0178792	-0.0485397
3.1	4.53884	0.0707493	0.212479	0.391156	0.452748	0.0320852
3.2	3.1828	-1.82699	0.665227	0.423242	-0.0806529	-0.307892
3.3	1.30274	-0.337612	0.584574	0.11535	0.122919	-0.0431512
3.4	2.05572	-1.68959	0.707494	0.0721988	-0.0243635	-0.204123
3.5	3.30084	2.06001	0.68313	-0.131924	-0.155118	0.291366
3.6	4.57806	-1.45195	0.528012	0.159441	0.0542815	-0.454576
3.7	1.12111	-1.40477	0.582294	-0.295135	0.0185281	-0.11057
3.8	2.00459	-0.593008	0.600822	-0.405704	0.166233	-0.112028
3.9	2.27882	-0.725354	0.767055	-0.517732	0.170516	-0.151177
4	0.714406	-2.56063	0.937571	-0.66891	-0.0597197	-0.0392086
4.1	2.4177	1.0246	0.877852	-0.708118	0.125585	0.206594
4.2	4.97163	0.953408	1.00344	-0.501524	0.287812	0.405383
4.3	3.56987	-1.40967	1.29125	-0.0961405	0.0572704	-0.352363
4.4	1.70808	0.484081	1.34852	-0.448503	0.151182	0.079493
4.5	4.41639	-0.0527138	1.4997	-0.36901	0.441026	-0.0232697
4.6	4.36176	-1.19282	1.94073	-0.39228	0.160968	-0.405387
4.7	4.7194	-1.28889	2.1017	-0.797667	0.131289	-0.453311
4.8	1.05664	-1.20051	2.23298	-1.25098	0.0382378	-0.0985023
4.9	0.234734	1.346	2.27122	-1.34948	0.00523237	0.0228828
5	0.83336	-2.42757	2.27645	-1.3266	-0.0629797	-0.0545751
5.1	0.871078	-1.34676	2.21347	-1.38117	0.0193527	-0.0849308
5.2	2.15116	1.39571	2.23283	-1.4661	0.0374721	0.211827
5.3	0.175633	1.95652	2.2703	-1.25428	-0.00660782	0.0162728
5.4	0.469891	-0.35587	2.26369	-1.238	0.0440449	-0.0163713
5.5	2.36497	-1.75397	2.30774	-1.25438	-0.0430789	-0.23254
5.6	1.55177	-2.86138	2.26466	-1.48692	-0.149124	-0.0429156
5.7	4.03719	-1.77684	2.11553	-1.52983	-0.0825973	-0.39518
5.8	3.71156	-1.03682	2.03294	-1.92501	0.188902	-0.319488
5.9	4.06529	-2.80867	2.22184	-2.2445	-0.384207	-0.132856
6	4.03367	2.67447	1.83763	-2.37735	-0.360153	0.181643
6.1	3.20758	1.33569	1.47748	-2.19571	0.0747191	0.311934
6.2	1.70859	-0.378738	1.5522	-1.88378	0.158751	-0.0631749
6.3	4.5602	0.774886	1.71095	-1.94695	0.325827	0.319047
6.4	0.577463	-0.800378	2.03677	-1.62791	0.0402166	-0.0414399
6.5	4.92303	1.55771	2.07699	-1.66934	0.00644005	0.492261
6.6	3.46402	1.14067	2.08343	-1.17708	0.144445	0.314849
6.7	1.13546	-2.53429	2.22788	-0.862235	-0.0932429	-0.0647958
6.8	3.90168	-2.65991	2.13463	-0.927031	-0.345774	-0.180753
6.9	4.15202	-0.383952	1.78886	-1.10778	0.384972	-0.15553
7	0.50232	-1.7752	2.17383	-1.26331	-0.0101962	-0.0491863
7.1	4.06348	-2.05143	2.16364	-1.3125	-0.187871	-0.36031
7.2	4.35426	-0.146175	1.97576	-1.67281	0.430783	-0.0634218
7.3	2.87848	-0.0551511	2.40655	-1.73623	0.28741	-0.0158671
7.4	3.0672	-2.93625	2.69396	-1.7521	-0.300276	-0.0625396
7.5	1.6529	2.64229	2.39368	-1.81464	-0.145111	0.0791423
7.6	0.200827	-1.23265	2.24857	-1.7355	0.00666211	-0.0189455
7.7	2.27405	2.35423	2.25523	-1.75444	-0.160484	0.161114
7.8	2.9497	2.73983	2.09475	-1.59333	-0.271482	0.115346
7.9	3.58353	-1.53054	1.82327	-1.47798	0.0144237	-0.358063
8	2.93205	-2.36713	1.83769	-1.83605	-0.209582	-0.205048
8.1	2.51972	-2.44812	1.62811	-2.04109	-0.193774	-0.161064
8.2	3.41233	2.76014	1.43433	-2.20216	-0.316706	0.127032
8.3	1.54998	-2.09006	1.11763	-2.07513	-0.0769162	-0.134567
8.4	0.691894	-1.95379	1.04071	-2.20969	-0.0258563	-0.0641765
8.5	0.285563	2.32864	1.01486	-2.27387	-0.0196283	0.020741
8.6	4.85007	2.4919	0.995228	-2.25313	-0.386197	0.293399
8.7	4.5574	0.102856	0.60903	-1.95973	0.453332	0.0467931
8.8	1.91446	1.63333	1.06236	-1.91294	-0.0119634	0.191072
8.9	3.62146	-0.472041	1.0504	-1.72186	0.322542	-0.164669
9	2.89266	0.394042	1.37294	-1.88653	0.267098	0.111056
9.1	4.77851	2.67444	1.64004	-1.77548	-0.426652	0.215197
9.2	1.07581	-1.48449	1.21339	-1.56028	0.00927394	-0.107181
9.3	0.800701	-2.25194	1.22266	-1.66746	-0.0504186	-0.0622028
9.4	4.4325	1.64748	1.17224	-1.72966	-0.0339582	0.441947
9.5	1.72262	-2.86726	1.13828	-1.28772	-0.16582	-0.0466666
9.6	1.18928	2.03719	0.972464	-1.33438	-0.0534779	0.106226
9.7	2.75652	0.163871	0.918986	-1.22816	0.271959	0.0449696
9.8	0.7756	2.67875	1.19095	-1.18319	-0.0693997	0.03463
9.9	4.2295	-0.721085	1.12155	-1.14856	0.317673	-0.279232
0	4.71901	2.00583	0	0	-0.198878	0.427946
0.1	3.03979	-1.8702	-0.198878	0.427946	-0.0896596	-0.290455
0.2	4.1288	-0.757098	-0.288538	0.137491	0.300095	-0.283572
0.3	1.71596	-0.384901	0.0115569	-0.146081	0.159042	-0.0644288
0.4	0.568316	-0.473048	0.170599	-0.21051	0.0505906	-0.0258926
0.5	2.9841	1.96146	0.221189	-0.236402	-0.113636	0.275926
0.6	3.90364	-1.42864	0.107553	0.039524	0.0553068	-0.386426
0.7	2.22947	-2.94523	0.16286	-0.346902	-0.218662	-0.0434975
0.8	3.88616	2.65471	-0.0558027	-0.3904	-0.343458	0.181822
0.9	3.07117	-0.680126	-0.399261	-0.208578	0.238782	-0.193143
1	3.35764	1.37817	-0.160479	-0.401721	0.0642791	0.329554
1.1	3.59749	1.57631	-0.0962	-0.0721671	-0.00198232	0.359743
1.2	4.47864	1.48063	-0.0981823	0.287576	0.0403254	0.446045
1.3	2.46444	0.828248	-0.0578569	0.733621	0.166638	0.181567
1.4	3.3059	1.95429	0.108781	0.915188	-0.123695	0.306576
1.5	0.436825	-2.23934	-0.0149145	1.22176	-0.0270765	-0.0342787
1.6	0.27779	-1.5887	-0.041991	1.18749	-0.000497191	-0.0277745
1.7	2.6558	2.13184	-0.0424882	1.15971	-0.141307	0.224866
1.8	0.52444	-2.30606	-0.183796	1.38458	-0.0351784	-0.0388954
1.9	4.12473	0.595938	-0.218974	1.34568	0.341372	0.231515
2	0.330781	-2.9984	0.122398	1.5772	-0.0327395	-0.00472052
2.1	3.7488	-1.2447	0.0896584	1.57248	0.120093	-0.355124
2.2	4.32542	0.383497	0.209752	1.21735	0.401123	0.161842
2.3	4.73015	-1.54375	0.610875	1.37919	0.0127908	-0.472842
2.4	4.56962	-0.480181	0.623666	0.906353	0.405285	-0.211089
2.5	1.76763	2.52221	1.02895	0.695264	-0.143927	0.102618
2.6	0.539705	2.59125	0.885023	0.797881	-0.0460014	0.0282255
2.7	2.54744	-0.481354	0.839022	0.826107	0.225797	-0.117941
2.8	0.646371	1.13908	1.06482	0.708166	0.0270461	0.0587066
2.9	4.48956	-0.331122	1.09186	0.766873	0.424568	-0.145958
3	4.31125	1.86689	1.51643	0.620915	-0.125797	0.412364
3.1	2.86447	-1.2231	1.39064	1.03328	0.0976012	-0.269306
3.2	1.30806	-1.47294	1.48824	0.763973	0.0127793	-0.13018
3.3	4.56274	0.372165	1.50102	0.633792	0.425039	0.165916
3.4	0.92463	1.39251	1.92606	0.799708	0.0163973	0.0909975
3.5	4.68548	0.851968	1.94245	0.890706	0.308541	0.352619
3.6	0.300621	1.96973	2.25099	1.24333	-0.0116772	0.0277015
3.7	3.74471	-1.46536	2.23932	1.27103	0.0394103	-0.372392
3.8	1.4017	-2.8779	2.27873	0.898635	-0.135325	-0.0365345
3.9	2.66156	1.57394	2.1434	0.8621	-0.00083735	0.266154
4	2.57203	-2.15323	2.14256	1.12825	-0.141478	-0.214797
4.1	2.18082	1.62763	2.00109	0.913458	-0.0123875	0.21773
4.2	3.79551	2.55792	1.9887	1.13119	-0.316715	0.209167
4.3	1.74373	-1.79356	1.67198	1.34035	-0.0385242	-0.170065
4.4	1.51766	1.71579	1.63346	1.17029	-0.0219284	0.150174
4.5	2.75819	3.12683	1.61153	1.32046	-0.275789	0.00407267
4.6	2.73801	-2.69803	1.33574	1.32454	-0.247306	-0.117504
4.7	3.38611	0.977689	1.08844	1.20703	0.189263	0.280779
4.8	2.45013	0.46198	1.2777	1.48781	0.219328	0.109207
4.9	4.66009	0.269643	1.49703	1.59702	0.44917	0.124139
5	4.34268	1.8841	1.9462	1.72116	-0.133843	0.413127
5.1	3.17504	2.65997	1.81236	2.13428	-0.281386	0.147073
5.2	2.15977	-1.04724	1.53097	2.28136	0.10798	-0.187046
5.3	1.03262	-1.21439	1.63895	2.09431	0.0360288	-0.096773
5.4	4.62719	-2.6998	1.67498	1.99754	-0.418292	-0.19784
5.5	1.53756	-0.377069	1.25669	1.7997	0.142954	-0.0566124
5.6	4.42069	-2.64546	1.39964	1.74309	-0.388768	-0.210437
5.7	1.05514	-2.36609	1.01087	1.53265	-0.0753448	-0.0738676
5.8	2.99268	1.21616	0.935527	1.45878	0.10392	0.280645
5.9	1.66357	-2.29389	1.03945	1.73943	-0.11008	-0.124728
6	2.14338	1.93105	0.929368	1.6147	-0.0755558	0.200579
6.1	4.79179	1.17851	0.853812	1.81528	0.183189	0.44278
6.2	2.66744	3.01582	1.037	2.25806	-0.264637	0.03346
6.3	4.93868	2.29439	0.772364	2.29152	-0.32698	0.370122
6.4	3.38539	2.06564	0.445384	2.66164	-0.16077	0.297929
6.5	3.59061	-1.88814	0.284615	2.95957	-0.112043	-0.341132
6.6	0.747952	-1.74088	0.172571	2.61843	-0.0126599	-0.073716
6.7	2.36337	-2.55861	0.159912	2.54472	-0.1973	-0.130108
6.8	1.06499	-2.15417	-0.0373884	2.41461	-0.0586643	-0.0888849
6.9	4.25943	2.50792	-0.0960527	2.32573	-0.34325	0.252203
7	2.45121	-0.20761	-0.439303	2.57793	0.239857	-0.0505249
7.1	2.58427	1.16825	-0.199446	2.5274	0.101243	0.237769
7.2	4.00296	1.13131	-0.0982028	2.76517	0.170314	0.362256
7.3	0.392032	0.318679	0.0721113	3.12743	0.0372294	0.0122828
7.4	2.45441	-1.7719	0.109341	3.13971	-0.0490274	-0.240495
7.5	1.82079	-3.0108	0.0603133	2.89922	-0.180524	-0.0237468
7.6	3.44317	-2.345	-0.120211	2.87547	-0.240729	-0.246178
7.7	0.330614	2.72611	-0.36094	2.62929	-0.0302486	0.0133446
7.8	1.79691	1.34786	-0.391188	2.64264	0.039728	0.175244
7.9	0.458545	0.551394	-0.35146	2.81788	0.0390587	0.0240221
8	4.55097	2.01264	-0.312402	2.8419	-0.194602	0.411392
8.1	3.31637	-1.05353	-0.507004	3.2533	0.163996	-0.288251
8.2	1.20221	-2.48406	-0.343008	2.96505	-0.0951553	-0.0734745
8.3	2.14884	2.65635	-0.438163	2.89157	-0.190078	0.100226
8.4	2.32724	0.223984	-0.628242	2.9918	0.22691	0.0516916
8.5	0.710495	-1.63468	-0.401332	3.04349	-0.00453565	-0.0709046
8.6	4.2834	-2.88929	-0.405867	2.97258	-0.414779	-0.106928
8.7	0.123072	-1.17876	-0.820646	2.86566	0.00470225	-0.0113735
8.8	1.35134	-1.25225	-0.815944	2.85428	0.0423219	-0.128336
8.9	1.08	0.528013	-0.773622	2.72595	0.0932917	0.0544124
9	4.75634	1.26203	-0.68033	2.78036	0.144536	0.453142
9.1	1.67309	0.500702	-0.535794	3.2335	0.146771	0.080315
9.2	0.512211	2.11801	-0.389024	3.31382	-0.0266509	0.0437416
9.3	4.69776	-1.18987	-0.415675	3.35756	0.174653	-0.436103
9.4	3.11408	-3.04927	-0.241021	2.92145	-0.310081	-0.0287103
9.5	0.956868	-0.356169	-0.551103	2.89274	0.0896814	-0.0333647
9.6	4.54304	-2.1087	-0.461421	2.85938	-0.232757	-0.39015
9.7	2.78025	3.06565	-0.694178	2.46923	-0.277224	0.0210944
9.8	0.0016857	-1.14052	-0.971402	2.49032	7.03142e-05	-0.000153205
9.9	2.11669	2.25289	-0.971331	2.49017	-0.133439	0.164309
0	2.39096	2.60033	0	0	-0.204919	0.123187
0.1	4.76473	-2.84776	-0.204919	0.123187	-0.456052	-0.137997
0.2	3.8724	-2.23606	-0.66097	-0.0148094	-0.239031	-0.304662
0.3	4.02516	2.00829	-0.900001	-0.319472	-0.170533	0.364606
0.4	4.10315	0.341927	-1.07053	0.0451341	0.386562	0.13758
0.5	4.67111	0.0300753	-0.683972	0.182714	0.4669	0.0140464
0.6	0.347711	1.82649	-0.217072	0.196761	-0.00879427	0.0336406
0.7	3.37874	-1.21134	-0.225866	0.230401	0.118853	-0.31628
0.8	0.966755	-3.0302	-0.107013	-0.0858791	-0.0960763	-0.010747
0.9	0.730319	1.22042	-0.20309	-0.0966261	0.025068	0.0685949
1	0.504187	0.495197	-0.178022	-0.0280312	0.0443622	0.0239592
1.1	1.18648	3.10187	-0.133659	-0.00407198	-0.118554	0.00471172
1.2	3.8345	-1.1894	-0.252214	0.000639738	0.142726	-0.355898
1.3	1.92472	3.13363	-0.109487	-0.355258	-0.192465	0.00153272
1.4	2.74847	-2.03272	-0.301953	-0.353725	-0.12249	-0.246043
1.5	2.02197	-1.90492	-0.424443	-0.599769	-0.0663092	-0.191015
1.6	1.69066	1.60888	-0.490752	-0.790784	-0.00643724	0.168943
1.7	0.245275	1.64285	-0.497189	-0.62184	-0.00176584	0.0244639
1.8	4.37874	-2.04525	-0.498955	-0.597377	-0.200045	-0.389507
1.9	3.23503	0.773509	-0.699001	-0.986883	0.231454	0.226015
2	0.881718	-1.73461	-0.467546	-0.760868	-0.0143789	-0.0869915
2.1	4.41895	-0.4691	-0.481925	-0.84786	0.39416	-0.199774
2.2	0.297966	-0.463029	-0.0877655	-1.04763	0.0266592	-0.013309
2.3	2.16584	-3.09267	-0.0611063	-1.06094	-0.216325	-0.0105906
2.4	3.42568	1.79543	-0.277431	-1.07153	-0.0763084	0.333961
2.5	1.65753	1.45662	-0.35374	-0.737572	0.0188847	0.164673
2.6	2.81371	-1.95724	-0.334855	-0.572898	-0.106049	-0.260621
2.7	4.90343	-1.39875	-0.440904	-0.833519	0.0839475	-0.483103
2.8	1.7654	0.31911	-0.356957	-1.31662	0.167627	0.0553842
2.9	3.61719	-0.290863	-0.18933	-1.26124	0.346526	-0.103734
3	2.87872	-0.421509	0.157196	-1.36497	0.262675	-0.117779
3.1	3.1355	2.41613	0.419872	-1.48275	-0.234595	0.208035
3.2	1.47998	-0.302665	0.185276	-1.27472	0.141271	-0.0441131
3.3	3.7665	0.792345	0.326547	-1.31883	0.264475	0.268175
3.4	2.23706	2.64814	0.591022	-1.05065	-0.197018	0.105964
3.5	0.640243	0.305223	0.394004	-0.944691	0.0610651	0.0192396
3.6	2.99335	0.202043	0.45507	-0.925451	0.293246	0.0600678
3.7	1.66974	-2.99645	0.748315	-0.865383	-0.165218	-0.0241507
3.8	2.91821	2.76715	0.583098	-0.889534	-0.271601	0.106735
3.9	2.01638	-2.27905	0.311497	-0.782799	-0.131167	-0.153144
4	0.369163	-2.11305	0.18033	-0.935943	-0.0190514	-0.0316205
4.1	4.61025	-0.690345	0.161279	-0.967564	0.355462	-0.293582
4.2	4.47791	-1.85023	0.516741	-1.26115	-0.123508	-0.430421
4.3	1.26722	-2.05743	0.393234	-1.69157	-0.0592617	-0.112011
4.4	1.58095	2.14143	0.333972	-1.80358	-0.0853976	0.133047
4.5	3.35865	-0.952349	0.248574	-1.67053	0.194725	-0.273656
4.6	4.80994	-1.65624	0.443299	-1.94419	-0.0410488	-0.479239
4.7	0.0718034	2.99809	0.40225	-2.42343	-0.00710653	0.00102688
4.8	0.0512084	1.47636	0.395144	-2.4224	0.000482859	0.00509803
4.9	2.2108	0.0665296	0.395626	-2.4173	0.220591	0.0146975
5	0.906954	2.67802	0.616218	-2.4026	-0.0811234	0.0405542
5.1	1.28726	-0.810361	0.535094	-2.36205	0.0887227	-0.0932666
5.2	3.61041	-1.46598	0.623817	-2.45532	0.037775	-0.359059
5.3	3.54626	-2.82219	0.661592	-2.81438	-0.336691	-0.111352
5.4	3.80412	1.74466	0.324901	-2.92573	-0.0658073	0.374677
5.5	3.44039	-1.26354	0.259094	-2.55105	0.104051	-0.327927
5.6	3.70337	-0.523153	0.363146	-2.87898	0.320804	-0.185025
5.7	3.27053	-2.74394	0.68395	-3.064	-0.301533	-0.126654
5.8	4.83575	-2.06727	0.382416	-3.19066	-0.230342	-0.425191
5.9	4.26024	-1.53827	0.152074	-3.61585	0.0138551	-0.425799
6	1.63955	-3.10933	0.165929	-4.04165	-0.16387	-0.00528873
6.1	0.115807	1.14744	0.00205911	-4.04694	0.00475762	0.0105583
6.2	0.0885043	0.887638	0.00681673	-4.03638	0.0055868	0.00686424
6.3	3.70236	-0.431516	0.0124035	-4.02951	0.336298	-0.154851
6.4	2.29772	-1.32104	0.348701	-4.18436	0.056793	-0.222642
6.5	1.62759	-0.543143	0.405494	-4.40701	0.139336	-0.0841186
6.6	1.25748	-0.895352	0.544831	-4.49112	0.0786234	-0.0981377
6.7	3.34281	-1.96803	0.623454	-4.58926	-0.129322	-0.308253
6.8	1.56077	-2.39624	0.494132	-4.89751	-0.114693	-0.105856
6.9	1.64342	0.0688551	0.379439	-5.00337	0.163953	0.0113068
7	3.56976	-2.88022	0.543391	-4.99206	-0.344852	-0.0922434
7.1	1.21031	2.00694	0.198539	-5.08431	-0.0511296	0.1097
7.2	1.59429	2.14246	0.147409	-4.97461	-0.0862557	0.13408
7.3	2.0341	2.42925	0.0611538	-4.84053	-0.153948	0.13295
7.4	0.0395985	1.02211	-0.0927941	-4.70758	0.00206534	0.00337858
7.5	4.07535	2.07607	-0.0907287	-4.7042	-0.197267	0.35661
7.6	0.100601	0.292494	-0.287996	-4.34759	0.00963287	0.00290075
7.7	0.285128	3.05904	-0.278363	-4.34469	-0.0284157	0.00235127
7.8	2.58199	-2.94272	-0.306778	-4.34234	-0.253109	-0.0510116
7.9	1.12157	1.76558	-0.559888	-4.39335	-0.0217086	0.110036
8	1.85764	-3.06174	-0.581596	-4.28331	-0.185172	-0.0148186
8.1	3.71348	-2.00329	-0.766768	-4.29813	-0.155645	-0.337156
8.2	4.50673	2.9673	-0.922413	-4.63529	-0.443845	0.0781522
8.3	2.07629	-0.0831475	-1.36626	-4.55713	0.206911	-0.0172439
8.4	1.9929	-0.524361	-1.15935	-4.57438	0.172515	-0.0997767
8.5	1.68036	-0.981641	-0.986832	-4.67415	0.0933709	-0.139707
8.6	1.73289	2.94286	-0.893461	-4.81386	-0.169879	0.0342112
8.7	1.85623	1.80987	-1.06334	-4.77965	-0.0439563	0.180344
8.8	4.69975	2.65251	-1.1073	-4.59931	-0.414876	0.220802
8.9	0.172203	2.74446	-1.52217	-4.3785	-0.0158801	0.00666041
9	1.9282	0.652793	-1.53805	-4.37184	0.153174	0.11712
9.1	2.50603	-0.666721	-1.38488	-4.25472	0.196937	-0.154976
9.2	0.49185	1.51452	-1.18794	-4.4097	0.00276666	0.0491071
9.3	0.995016	0.173574	-1.18517	-4.36059	0.0980064	0.0171843
9.4	3.46289	-0.103872	-1.08717	-4.34341	0.344423	-0.035905
9.5	0.565024	-1.9889	-0.742745	-4.37931	-0.0229414	-0.0516354
9.6	0.866696	1.75736	-0.765686	-4.43095	-0.0160754	0.0851657
9.7	3.2054	-1.53094	-0.781761	-4.34578	0.012771	-0.320285
9.8	0.882914	-3.12775	-0.76899	-4.66607	-0.088283	-0.00122234
9.9	4.65873	-0.32245	-0.857273	-4.66729	0.441863	-0.147629
0	3.55577	-2.40517	0	0	-0.263439	-0.23882
0.1	0.537501	-1.21859	-0.263439	-0.23882	0.0185419	-0.0504507
0.2	4.35394	-2.72006	-0.244897	-0.28927	-0.397281	-0.178146
0.3	4.50342	-2.45644	-0.642178	-0.467416	-0.34871	-0.284972
0.4	3.67485	2.9182	-0.990888	-0.752388	-0.358354	0.0814109
0.5	0.667915	2.23203	-1.34924	-0.670977	-0.0410162	0.0527141
0.6	4.12543	1.68013	-1.39026	-0.618263	-0.0450148	0.41008
0.7	3.3703	2.16056	-1.43527	-0.208183	-0.187444	0.280096
0.8	4.75078	-2.78095	-1.62272	0.0719135	-0.444516	-0.167644
0.9	4.95194	0.61724	-2.06723	-0.09573	0.40382	0.286612
1	1.64668	-0.729933	-1.66341	0.190882	0.122714	-0.109804
1.1	1.25026	3.10833	-1.5407	0.0810779	-0.124956	0.00415854
1.2	3.71857	-1.65546	-1.66565	0.0852365	-0.031447	-0.370525
1.3	2.73807	0.230357	-1.6971	-0.285289	0.266575	0.062517
1.4	1.91584	0.806676	-1.43053	-0.222772	0.132557	0.138322
1.5	2.36545	2.23248	-1.29797	-0.0844495	-0.145345	0.186624
1.6	4.03877	-2.15996	-1.44331	0.102174	-0.224419	-0.335786
1.7	2.57748	2.99175	-1.66773	-0.233612	-0.25486	0.0384783
1.8	3.14652	3.01463	-1.92259	-0.195134	-0.312119	0.0398411
1.9	2.68351	-2.19937	-2.23471	-0.155293	-0.157788	-0.217061
2	2.31731	1.99064	-2.3925	-0.372353	-0.0944567	0.211606
2.1	4.83732	1.23354	-2.48696	-0.160747	0.160068	0.456481
2.2	2.44207	-3.08788	-2.32689	0.295734	-0.243855	-0.0131096
2.3	3.32541	-2.93721	-2.57074	0.282624	-0.325619	-0.0674949
2.4	4.48905	-1.32191	-2.89636	0.215129	0.110576	-0.435074
2.5	2.78151	3.00296	-2.78579	-0.219944	-0.275482	0.0384381
2.6	1.52612	2.79865	-3.06127	-0.181506	-0.143725	0.0513173
2.7	3.32162	2.55832	-3.20499	-0.130189	-0.277243	0.182942
2.8	1.76353	2.53573	-3.48224	0.0527528	-0.144964	0.100429
2.9	1.55898	-1.04321	-3.6272	0.153182	0.0784868	-0.134699
3	2.76858	0.314946	-3.54871	0.0184825	0.26324	0.0857608
3.1	2.87396	-1.08041	-3.28547	0.104243	0.135353	-0.253527
3.2	0.516026	2.00717	-3.15012	-0.149284	-0.02181	0.046767
3.3	0.94405	3.09551	-3.17193	-0.102517	-0.0943047	0.00434931
3.4	1.75638	-0.777414	-3.26624	-0.0981673	0.125183	-0.123199
3.5	4.92848	-3.07761	-3.14105	-0.221367	-0.49184	-0.0315098
3.6	4.96922	2.60219	-3.63289	-0.252876	-0.426367	0.25523
3.7	1.97036	-2.26997	-4.05926	0.00235316	-0.12681	-0.150806
3.8	2.70641	2.56607	-4.18607	-0.148453	-0.227043	0.147302
3.9	3.16157	0.96677	-4.41311	-0.00115057	0.179565	0.260215
4	4.20355	-2.10275	-4.23355	0.259064	-0.21321	-0.36227
4.1	3.35445	1.00478	-4.44676	-0.103206	0.179889	0.283131
4.2	4.94051	1.9311	-4.26687	0.179926	-0.17418	0.462329
4.3	1.75192	-1.73782	-4.44105	0.642255	-0.0291256	-0.172754
4.4	0.678621	-1.78059	-4.47017	0.469501	-0.0141328	-0.0663741
4.5	0.727099	-2.49783	-4.48431	0.403126	-0.0581565	-0.0436412
4.6	2.79622	-1.86858	-4.54246	0.359485	-0.0820417	-0.267316
4.7	4.96929	-1.42174	-4.62451	0.0921697	0.0737949	-0.491419
4.8	0.383631	-1.0263	-4.55071	-0.399249	0.0198717	-0.0328153
4.9	2.72552	-1.76958	-4.53084	-0.432065	-0.0538218	-0.267185
5	0.218172	1.88639	-4.58466	-0.69925	-0.00677169	0.0207397
5.1	2.5119	-2.15644	-4.59143	-0.67851	-0.138841	-0.209332
5.2	0.733013	2.07814	-4.73027	-0.887842	-0.0356136	0.0640683
5.3	3.21982	-2.58801	-4.76589	-0.823773	-0.273893	-0.169278
5.4	0.500729	0.243616	-5.03978	-0.993052	0.0485944	0.0120783
5.5	3.66833	-1.54218	-4.99119	-0.980974	0.0104959	-0.366683
5.6	2.9371	1.46606	-4.98069	-1.34766	0.0307061	0.2921
5.7	1.20855	-1.3554	-4.94998	-1.05556	0.0258314	-0.118062
5.8	4.14276	2.0328	-4.92415	-1.17362	-0.184662	0.370843
5.9	4.63966	0.225774	-5.10881	-0.802775	0.452192	0.103864
6	4.69225	-0.145951	-4.65662	-0.698911	0.464236	-0.0682408
6.1	4.22424	2.0742	-4.19239	-0.767152	-0.20378	0.370021
6.2	0.572439	1.65167	-4.39617	-0.397131	-0.00462419	0.0570568
6.3	3.31373	-0.817877	-4.40079	-0.340074	0.226584	-0.241802
6.4	3.71253	2.19067	-4.17421	-0.581876	-0.215673	0.302182
6.5	2.56338	-1.12671	-4.38988	-0.279694	0.110132	-0.231474
6.6	2.28308	-1.33294	-4.27975	-0.511168	0.0537931	-0.221881
6.7	0.574536	-2.89492	-4.22596	-0.733049	-0.0557144	-0.0140291
6.8	3.34687	-2.93035	-4.28167	-0.747078	-0.327248	-0.0701762
6.9	2.71185	0.957266	-4.60892	-0.817254	0.156137	0.221727
7	3.4114	2.31272	-4.45278	-0.595528	-0.23051	0.251479
7.1	4.71908	-0.840636	-4.68329	-0.344049	0.314758	-0.351603
7.2	3.30631	-0.648004	-4.36853	-0.695652	0.263609	-0.199567
7.3	3.2431	1.2397	-4.10492	-0.895219	0.105427	0.306695
7.4	1.59459	-0.677548	-3.9995	-0.588524	0.124237	-0.0999625
7.5	2.54326	-2.44078	-3.87526	-0.688487	-0.194387	-0.163999
7.6	0.114339	-1.29281	-4.06965	-0.852486	0.00313775	-0.010995
7.7	4.50681	-0.961217	-4.06651	-0.863481	0.258025	-0.369509
7.8	4.26306	-2.70395	-3.80848	-1.23299	-0.386128	-0.180671
7.9	3.22186	-1.25961	-4.19461	-1.41366	0.0986492	-0.306712
8	2.37899	1.41865	-4.09596	-1.72037	0.0360552	0.235151
8.1	2.249	2.45069	-4.05991	-1.48522	-0.173324	0.143313
8.2	4.14377	-0.224467	-4.23323	-1.34191	0.403981	-0.0922346
8.3	4.07553	1.70084	-3.82925	-1.43414	-0.0528521	0.404112
8.4	3.29786	0.702982	-3.8821	-1.03003	0.251599	0.213205
8.5	4.97763	2.74498	-3.6305	-0.816825	-0.459124	0.192284
8.6	4.5634	1.46839	-4.08963	-0.624541	0.0466492	0.453949
8.7	3.86938	1.09669	-4.04298	-0.170592	0.176655	0.344258
8.8	4.18371	1.16579	-3.86632	0.173666	0.16485	0.384524
8.9	4.67196	1.95255	-3.70147	0.55819	-0.174053	0.433564
9	4.89399	0.415682	-3.87553	0.991754	0.447723	0.197626
9.1	3.00121	1.39516	-3.4278	1.18938	0.0524409	0.295504
9.2	2.56872	2.34228	-3.37536	1.48488	-0.179091	0.184145
9.3	0.0266066	-0.693982	-3.55445	1.66903	0.00204526	-0.00170176
9.4	1.33564	-0.549136	-3.55241	1.66733	0.113927	-0.0697137
9.5	4.50928	0.767326	-3.43848	1.59761	0.324564	0.31304
9.6	4.26875	-1.1004	-3.11392	1.91065	0.193479	-0.380511
9.7	0.949331	3.11229	-2.92044	1.53014	-0.0948924	0.00278166
9.8	1.2266	-1.26193	-3.01533	1.53292	0.0372865	-0.116856
9.9	0.590389	-1.26524	-2.97804	1.41607	0.0177636	-0.0563048
