# Supplementary material
Source: ML conference proceedings conference paper supplement (https://openreview.net/forum?id=mfJepDyIUcQ)
Supplement: supplementary_material [file data_3D.xlsx]

## Sheet: Sheet1
	V	theta	gamma	x	y	z	dx	dy	dz
0	4.53836	2.597	2.82825	0	0	0	0.369281	-0.119655	0.23512
0.1	1.10645	-0.749225	-1.68931	0.369281	-0.119655	0.23512	-0.00957876	-0.0804477	-0.0753571
0.2	0.990294	0.560708	0.671312	0.359702	-0.200103	0.159763	0.0656675	0.0521657	0.0526624
0.3	2.52967	2.85785	-0.0880747	0.42537	-0.147937	0.212425	-0.24191	0.0213615	0.0708194
0.4	3.29933	-1.72989	2.4586	0.183459	-0.126576	0.283245	0.0405442	-0.0329874	-0.325767
0.5	1.66425	-0.591383	1.6468	0.224003	-0.159563	-0.0425221	-0.0104911	0.137763	-0.0927838
0.6	0.507001	-2.03128	-0.273522	0.213512	-0.0218004	-0.135306	-0.0216925	0.00608591	-0.0454191
0.7	4.24452	-0.0924706	-3.02533	0.19182	-0.0157145	-0.180725	-0.419785	-0.0490261	-0.0391934
0.8	0.00432193	-3.02681	2.01946	-0.227965	-0.0647406	-0.219918	0.000186236	-0.000386856	-4.94988e-05
0.9	1.80012	-1.25294	-0.347439	-0.227779	-0.0651274	-0.219968	0.0528981	-0.0191559	-0.170995
1	4.63742	-1.86447	0.725283	-0.174881	-0.0842834	-0.390963	-0.100453	-0.0890474	-0.443888
1.1	4.85406	0.771024	1.83429	-0.275334	-0.173331	-0.834851	-0.0906743	0.336116	0.338265
1.2	4.06587	0.0939081	2.65033	-0.366008	0.162785	-0.496586	-0.356924	0.190959	0.0381257
1.3	0.815399	-1.31764	1.4967	-0.722932	0.353744	-0.45846	0.00151185	0.0203665	-0.078941
1.4	3.54314	1.38682	-2.03408	-0.72142	0.37411	-0.537401	-0.028967	-0.0579868	0.348335
1.5	3.80521	2.91167	-0.592465	-0.750387	0.316124	-0.189066	-0.307361	0.206894	0.0867211
1.6	0.239237	0.120305	2.73614	-1.05775	0.523018	-0.102345	-0.0218251	0.0093682	0.0028712
1.7	2.16026	-1.21167	2.61949	-1.07957	0.532386	-0.0994741	-0.0658089	0.0378638	-0.202244
1.8	2.3285	-2.64322	-0.563789	-1.14538	0.57025	-0.301718	-0.172873	0.109297	-0.111302
1.9	0.0253957	0.630866	2.47337	-1.31825	0.679547	-0.413021	-0.00160968	0.00127062	0.00149795
2	1.66216	-1.50463	-2.77785	-1.31986	0.680818	-0.411523	-0.0102701	-0.00390963	-0.165852
2.1	4.1519	2.09924	-0.924457	-1.33013	0.676908	-0.577375	-0.126077	0.167112	0.358554
2.2	0.75988	-0.430014	1.96768	-1.45621	0.84402	-0.218821	-0.026699	0.0637012	-0.0316781
2.3	2.04423	0.421715	-3.07963	-1.48291	0.907722	-0.250499	-0.186156	-0.0115491	0.0836758
2.4	3.62653	-1.31109	-2.26892	-1.66907	0.896173	-0.166823	-0.0598616	-0.0713421	-0.350491
2.5	1.38818	-2.35656	-1.86758	-1.72893	0.82483	-0.517314	0.0287169	0.0939023	-0.0981238
2.6	0.578352	1.38987	-1.89299	-1.70021	0.918733	-0.615438	-0.00329536	-0.00987159	0.0568912
2.7	3.60754	1.17536	0.652147	-1.70351	0.908861	-0.558547	0.110448	0.0843378	0.332914
2.8	3.85874	-0.059729	-1.43139	-1.59306	0.993199	-0.225632	0.0535253	-0.381449	-0.0230342
2.9	0.863871	0.403147	-1.89241	-1.53953	0.61175	-0.248667	-0.0251173	-0.0753873	0.033891
3	2.94709	-1.9768	-3.04562	-1.56465	0.536363	-0.214776	0.115857	0.011153	-0.270751
3.1	1.73352	0.686093	1.5506	-1.44879	0.547516	-0.485526	0.00270868	0.1341	0.109822
3.2	4.99714	0.608493	-0.344969	-1.44608	0.681616	-0.375704	0.385864	-0.138656	0.285652
3.3	3.04868	1.01235	2.71317	-1.06022	0.54296	-0.0900522	-0.146941	0.0671097	0.258553
3.4	4.41295	1.22049	-0.213664	-1.20716	0.61007	0.1685	0.148004	-0.0321133	0.414494
3.5	1.33769	1.99828	-0.51114	-1.05916	0.577956	0.582994	-0.0483697	0.0271285	0.121732
3.6	1.99899	-2.52537	2.17537	-1.10753	0.605085	0.704726	0.0927263	-0.134215	-0.115533
3.7	3.14708	1.17165	0.158038	-1.0148	0.47087	0.589193	0.120782	0.0192487	0.28997
3.8	1.08048	-3.07201	-1.86832	-0.894018	0.490118	0.879162	0.0315983	0.103051	-0.00751239
3.9	4.58725	1.69189	1.08157	-0.862419	0.59317	0.87165	-0.0260417	-0.0489145	0.455366
4	3.36163	1.92964	2.12446	-0.888461	0.544255	1.32702	0.0620755	-0.10042	0.314751
4.1	2.30312	1.12389	-3.01819	-0.826386	0.443835	1.64177	-0.0987779	-0.0122513	0.207693
4.2	0.615052	-0.935768	1.139	-0.925163	0.431584	1.84946	0.0152691	0.0331362	-0.0495151
4.3	1.49125	-2.3592	-0.757243	-0.909894	0.46472	1.79994	-0.0768622	0.0726515	-0.10513
4.4	2.88902	2.86285	2.08474	-0.986756	0.537371	1.69481	0.136546	-0.24187	0.0794911
4.5	4.3812	-0.362839	0.0176739	-0.850211	0.295502	1.77431	0.409531	0.00723875	-0.155502
4.6	2.66972	-2.46001	1.31615	-0.44068	0.30274	1.6188	-0.0522261	-0.200638	-0.168199
4.7	4.04273	1.01437	-0.446782	-0.492906	0.102102	1.4506	0.192561	-0.0922548	0.343287
4.8	2.19747	-0.509992	-1.22763	-0.300344	0.00984743	1.79389	0.0645306	-0.180602	-0.107274
4.9	2.17766	1.76534	-1.94996	-0.235814	-0.170754	1.68662	0.0155824	0.0391079	0.213658
5	3.54746	-2.38888	-1.92623	-0.220231	-0.131646	1.90028	0.0900988	0.242725	-0.242511
5.1	0.194427	1.28562	1.14494	-0.130133	0.111079	1.65776	0.00225957	0.00498129	0.0186575
5.2	1.35416	0.919728	-1.23927	-0.127873	0.11606	1.67642	0.0267118	-0.0775979	0.107715
5.3	2.39783	-2.66873	0.261845	-0.101161	0.0384619	1.78414	-0.206195	-0.0552597	-0.109205
5.4	3.49587	-0.831755	-2.19363	-0.307356	-0.0167978	1.67493	-0.137362	-0.19126	-0.258385
5.5	2.08402	1.81563	1.24343	-0.444718	-0.208057	1.41655	-0.0162435	-0.0478337	0.202187
5.6	3.46939	-2.02535	-0.764205	-0.460961	-0.255891	1.61873	-0.10997	0.105405	-0.31171
5.7	3.21916	-1.77755	2.26202	-0.570932	-0.150486	1.30702	0.0421268	-0.050915	-0.31506
5.8	1.43546	-0.940474	2.22208	-0.528805	-0.201401	0.991963	-0.0512893	0.0672882	-0.115962
5.9	2.71969	2.72584	0.587873	-0.580094	-0.134113	0.876002	-0.207033	-0.137983	0.109842
6	4.26522	3.10799	-0.0216616	-0.787127	-0.272096	0.985844	-0.426181	0.0092332	0.0143305
6.1	4.82926	0.955715	2.51182	-1.21331	-0.262863	1.00017	-0.225203	0.164119	0.394419
6.2	3.83925	-0.997916	2.02086	-1.43851	-0.0987432	1.39459	-0.090531	0.187385	-0.322628
6.3	3.18479	-0.00927864	0.910499	-1.52904	0.0886419	1.07197	0.195331	0.251527	-0.00295501
6.4	4.19276	3.08137	1.99789	-1.33371	0.340169	1.06901	0.173361	-0.380921	0.0252364
6.5	1.20984	-2.88094	1.00674	-1.16035	-0.0407523	1.09425	-0.0624955	-0.0987891	-0.0311789
6.6	3.66525	-0.79839	-0.992928	-1.22284	-0.139541	1.06307	0.139719	-0.214252	-0.262518
6.7	4.38551	1.77721	-1.32119	-1.08313	-0.353793	0.80055	-0.0222028	0.0870968	0.429241
6.8	0.539853	-0.849211	-0.99781	-1.10533	-0.266696	1.22979	0.0193336	-0.0299657	-0.0405299
6.9	3.58452	2.0137	0.214125	-1.08599	-0.296662	1.18926	-0.150111	-0.0326429	0.323865
7	3.86561	-2.26243	1.42699	-1.23611	-0.329305	1.51313	-0.0353317	-0.244001	-0.297732
7.1	1.79199	1.94402	-1.19827	-1.27144	-0.573306	1.21539	-0.0237815	0.0608569	0.166862
7.2	0.0162592	-1.43595	2.12683	-1.29522	-0.512449	1.38226	-0.000115376	0.000185658	-0.00161116
7.3	3.28399	-0.312605	0.427712	-1.29533	-0.512263	1.38065	0.284334	0.129615	-0.100995
7.4	4.56696	2.67666	-0.814216	-1.011	-0.382648	1.27965	-0.280217	0.296852	0.204765
7.5	2.3982	-2.29784	1.27385	-1.29122	-0.0857967	1.48442	-0.04664	-0.152423	-0.179181
7.6	4.91841	-0.580858	0.292615	-1.33786	-0.23822	1.30523	0.393697	0.118606	-0.269894
7.7	2.3748	0.695128	-0.346328	-0.944161	-0.119613	1.03534	0.171549	-0.0619075	0.152102
7.8	4.85481	2.00443	1.2225	-0.772612	-0.181521	1.18744	-0.0696191	-0.191737	0.440548
7.9	1.93726	-2.79476	0.762214	-0.842231	-0.373258	1.62799	-0.13178	-0.125807	-0.0658522
8	3.1985	-1.39296	1.85242	-0.97401	-0.499064	1.56214	-0.0157245	0.0543519	-0.314806
8.1	1.91416	-0.293996	2.87043	-0.989735	-0.444713	1.24733	-0.176509	0.049071	-0.0554684
8.2	4.01799	3.07211	0.141939	-1.16624	-0.395642	1.19186	-0.396799	-0.0567027	0.0278967
8.3	4.88268	2.95245	2.3885	-1.56304	-0.452344	1.21976	0.349877	-0.327969	0.0918036
8.4	0.413395	-3.02706	-2.05488	-1.21317	-0.780313	1.31156	0.0191132	0.03635	-0.00472428
8.5	2.76764	-2.37746	3.01434	-1.19405	-0.743963	1.30684	0.198204	-0.0253592	-0.191496
8.6	3.9571	-3.04528	-1.43604	-0.995849	-0.769322	1.11534	-0.0529171	0.390305	-0.0380522
8.7	4.20535	-0.425284	-1.55616	-1.04877	-0.379017	1.07729	0.00560637	-0.383033	-0.173504
8.8	4.685	1.13268	2.36086	-1.04316	-0.76205	0.903788	-0.141195	0.139884	0.424251
8.9	3.99546	1.48492	1.49104	-1.18435	-0.622166	1.32804	0.00273051	0.034162	0.398074
9	0.584941	-0.785985	-2.28382	-1.18162	-0.588004	1.72611	-0.0270397	-0.031267	-0.0413859
9.1	3.33366	-1.70478	-3.06772	-1.20866	-0.619271	1.68473	0.0444107	0.00328658	-0.330379
9.2	4.14533	-1.94445	2.47493	-1.16425	-0.615984	1.35435	0.118916	-0.0935665	-0.385929
9.3	2.03166	-2.52475	-1.89037	-1.04534	-0.709551	0.968419	0.0520646	0.157334	-0.117523
9.4	4.27368	2.13043	-1.26466	-0.993273	-0.552217	0.850895	-0.068376	0.216331	0.362173
9.5	3.90233	2.7058	1.01437	-1.06165	-0.335886	1.21307	-0.186839	-0.300395	0.164729
9.6	2.35182	-2.15937	-1.3546	-1.24849	-0.636281	1.3778	-0.0280085	0.127527	-0.195609
9.7	4.398	2.18591	-0.19337	-1.2765	-0.508754	1.18219	-0.249056	0.0487693	0.359189
9.8	2.18789	-3.04774	-2.73456	-1.52555	-0.459985	1.54138	0.20003	0.0862344	-0.0205028
9.9	3.95159	-1.67133	3.0683	-1.32552	-0.373751	1.52087	0.039552	-0.00289919	-0.393164
0	0.348308	-1.80617	1.34447	0	0	0	-0.00182271	-0.00791554	-0.0338705
0.1	1.1662	2.48931	-0.266886	-0.00182271	-0.00791554	-0.0338705	-0.0893964	0.0244417	0.0707884
0.2	3.6872	-2.99513	-0.232786	-0.0912191	0.0165262	0.0369179	-0.354934	0.084149	-0.0538111
0.3	3.79267	1.3399	1.10644	-0.446153	0.100675	-0.0168932	0.038872	0.0776055	0.369201
0.4	3.18414	2.69272	3.01549	-0.407281	0.178281	0.352308	0.284594	-0.0360795	0.138176
0.5	3.06434	1.07164	-0.715723	-0.122687	0.142201	0.490484	0.110692	-0.09625	0.269045
0.6	1.54035	-0.706588	1.75376	-0.0119952	0.0459513	0.759528	-0.0213157	0.1152	-0.100006
0.7	1.42813	-2.57886	-2.39266	-0.0333108	0.161152	0.659523	0.088469	0.0822419	-0.076191
0.8	0.39052	-2.66455	2.33415	0.0551581	0.243394	0.583332	0.0239842	-0.0250658	-0.017931
0.9	4.76585	2.73501	2.46871	0.0791423	0.218328	0.565401	0.342318	-0.272815	0.188477
1	2.91849	1.3651	0.281952	0.42146	-0.0544872	0.753878	0.0572554	0.0165851	0.285697
1.1	0.633389	0.784828	-3.03651	0.478715	-0.0379021	1.03957	-0.0445657	-0.00470032	0.0447618
1.2	1.35851	2.58484	0.681815	0.43415	-0.0426024	1.08434	-0.0895489	-0.072684	0.0717877
1.3	3.91815	2.08546	-2.69951	0.344601	-0.115286	1.15612	0.174327	0.0825129	0.341058
1.4	1.21555	-0.622394	-2.87896	0.518928	-0.0327735	1.49718	-0.0953748	-0.025641	-0.0708642
1.5	1.44806	1.10644	0.913336	0.423553	-0.0584145	1.42632	0.0396309	0.0513324	0.129473
1.6	4.07728	2.88403	0.747522	0.463184	-0.00708207	1.55579	-0.289155	-0.26804	0.103857
1.7	4.01928	-1.13872	-0.544684	0.17403	-0.275122	1.65965	0.143953	-0.0872088	-0.364991
1.8	3.04539	-0.478627	-0.336899	0.317983	-0.362331	1.29466	0.255122	-0.0893568	-0.140259
1.9	0.615657	-0.68153	-1.13548	0.573104	-0.451688	1.1544	0.0201625	-0.0433533	-0.0387853
2	4.10412	-0.970983	0.593537	0.593267	-0.495041	1.11561	0.192049	0.129574	-0.338771
2.1	4.32185	2.59246	-2.53469	0.785316	-0.365467	0.776841	0.302811	0.210248	0.225579
2.2	0.429192	-2.78004	-0.526577	1.08813	-0.155219	1.00242	-0.0347062	0.0201757	-0.0151817
2.3	3.78215	0.956724	-2.17492	1.05342	-0.135044	0.987238	-0.123791	-0.179355	0.309118
2.4	1.93741	-1.00654	-1.35644	0.929629	-0.314398	1.29636	0.0220393	-0.101238	-0.163709
2.5	2.23404	-2.18819	2.37668	0.951669	-0.415637	1.13265	0.0933054	-0.0895579	-0.182162
2.6	3.93666	-1.99884	-2.14128	1.04497	-0.505195	0.950485	0.0882467	0.137531	-0.358149
2.7	1.40899	2.59257	-2.62098	1.13322	-0.367664	0.592335	0.104268	0.0597846	0.0735288
2.8	2.3498	0.488942	-0.336527	1.23749	-0.307879	0.665864	0.195811	-0.0685013	0.110368
2.9	0.991691	-0.898693	0.536301	1.4333	-0.37638	0.776232	0.0530771	0.0315497	-0.0776012
3	3.97456	0.325349	1.29617	1.48638	-0.344831	0.698631	0.10213	0.362493	0.127043
3.1	1.76609	2.64868	1.8248	1.58851	0.017662	0.825674	0.0390958	-0.150593	0.0835698
3.2	0.143695	3.13702	-1.15137	1.6276	-0.132931	0.909244	-0.00585171	0.0131238	6.57437e-05
3.3	1.55271	1.49294	-1.69594	1.62175	-0.119807	0.909309	-0.00150731	-0.0119816	0.154801
3.4	2.60439	0.195088	-0.235985	1.62024	-0.131789	1.06411	0.248417	-0.0597357	0.0504869
3.5	4.72995	2.22234	0.757654	1.86866	-0.191524	1.1146	-0.208367	-0.197115	0.376102
3.6	2.86223	2.1399	2.19629	1.66029	-0.388639	1.4907	0.0903055	-0.125037	0.24111
3.7	1.55704	-0.52902	2.20495	1.7506	-0.513677	1.73181	-0.0796432	0.108284	-0.0785817
3.8	1.63986	1.55553	-2.18239	1.67096	-0.405392	1.65323	-0.00143767	-0.00205001	0.163967
3.9	3.2633	2.60606	-2.21791	1.66952	-0.407442	1.81719	0.169195	0.223905	0.166526
4	3.02576	-2.00929	-0.250437	1.83871	-0.183538	1.98372	-0.124458	0.0318372	-0.273951
4.1	0.460814	-2.81451	1.8148	1.71425	-0.1517	1.70977	0.0105428	-0.0423456	-0.0148052
4.2	1.1218	2.46914	3.04845	1.7248	-0.194046	1.69496	0.0873778	-0.00816229	0.0698782
4.3	4.36405	3.03501	2.5105	1.81218	-0.202208	1.76484	0.350346	-0.25603	0.0464255
4.4	0.829751	1.1833	-1.60799	2.16252	-0.458238	1.81127	-0.00116587	-0.0313325	0.0768231
4.5	3.91373	-0.634935	2.15666	2.16136	-0.489571	1.88809	-0.174225	0.26255	-0.232133
4.6	3.64384	0.674172	0.823667	1.98713	-0.22702	1.65596	0.19344	0.208843	0.227467
4.7	0.185417	-2.65285	1.20184	2.18057	-0.0181773	1.88343	-0.00590401	-0.0152692	-0.00870559
4.8	4.63335	2.70921	0.454258	2.17467	-0.0334466	1.87472	-0.378029	-0.184598	0.194156
4.9	1.28338	-0.781983	-0.193376	1.79664	-0.218045	2.06888	0.0893608	-0.0174989	-0.0904382
5	2.89193	2.61413	3.0398	1.886	-0.235544	1.97844	0.248595	-0.0253926	0.145563
5.1	1.25605	2.85425	0.0574906	2.13459	-0.260936	2.124	-0.120256	-0.00692122	0.0355975
5.2	2.63407	1.81271	2.3731	2.01434	-0.267858	2.1596	0.0453678	-0.043859	0.255737
5.3	1.6084	1.45655	2.64426	2.05971	-0.311717	2.41534	-0.016114	0.0087473	0.159792
5.4	2.50119	1.14177	0.32234	2.04359	-0.302969	2.57513	0.0986869	0.0329603	0.227451
5.5	2.41625	2.27343	-0.666439	2.14228	-0.270009	2.80258	-0.122734	0.0965273	0.184394
5.6	3.57003	-1.70736	-0.299255	2.01954	-0.173482	2.98697	-0.0464434	0.0143288	-0.353679
5.7	1.47217	3.07819	-2.20142	1.9731	-0.159153	2.63329	0.0866321	0.118662	0.0093282
5.8	1.02166	2.17114	-0.698876	2.05973	-0.040491	2.64262	-0.0441859	0.0371324	0.0843014
5.9	0.0883655	-1.5967	-0.113351	2.01555	-0.00335858	2.72692	-0.000227423	2.58897e-05	-0.00883359
6	2.07215	-2.43517	-0.0256008	2.01532	-0.00333269	2.71809	-0.157574	0.00403489	-0.134507
6.1	3.59954	-0.339829	-2.17146	1.85775	0.000702205	2.58358	-0.191807	-0.279967	-0.119982
6.2	2.64596	-0.791048	-0.766416	1.66594	-0.279264	2.4636	0.134022	-0.129028	-0.188152
6.3	3.33373	3.08434	-2.79421	1.79996	-0.408292	2.27545	0.312946	0.113306	0.0190759
6.4	1.07379	2.06261	1.89155	2.11291	-0.294986	2.29452	0.0159867	-0.0481207	0.0946523
6.5	3.49737	-0.175025	-0.470822	2.12889	-0.343107	2.38918	0.306922	-0.156224	-0.0609006
6.6	0.270832	-2.44293	2.8974	2.43582	-0.499331	2.32828	0.0201224	-0.00501385	-0.0174199
6.7	4.30151	2.93343	1.00367	2.45594	-0.504344	2.31086	-0.226093	-0.354978	0.0888944
6.8	4.21412	-1.76582	2.6962	2.22985	-0.859323	2.39975	0.0736986	-0.0351829	-0.413424
6.9	1.164	2.15252	-1.54403	2.30354	-0.894505	1.98633	-0.00171143	0.0639347	0.097254
7	2.36231	-2.61975	-0.245467	2.30183	-0.830571	2.08358	-0.19865	0.0497656	-0.117756
7.1	3.84076	0.265741	-2.53092	2.10318	-0.780805	1.96582	-0.303614	-0.212505	0.100868
7.2	1.97564	0.106138	2.85862	1.79957	-0.993311	2.06669	-0.188639	0.0548524	0.0209296
7.3	3.65739	1.40811	-1.7532	1.61093	-0.938458	2.08762	-0.0107458	-0.0582571	0.360909
7.4	3.5668	-0.38593	2.92037	1.60018	-0.996715	2.44853	-0.322393	0.0725069	-0.134262
7.5	2.63813	-1.80619	1.63252	1.27779	-0.924208	2.31427	0.0037954	-0.0614099	-0.256538
7.6	2.67237	-0.0728008	-2.1908	1.28159	-0.985618	2.05773	-0.154863	-0.216922	-0.0194379
7.7	2.49666	-1.12808	-0.554682	1.12672	-1.20254	2.03829	0.0909192	-0.0563304	-0.225597
7.8	3.34675	0.00181587	2.05832	1.21764	-1.25887	1.8127	-0.156775	0.295683	0.000607726
7.9	0.0227387	3.07391	-1.54791	1.06087	-0.963188	1.8133	-5.19143e-05	0.00226807	0.000153778
8	3.7614	-1.41219	-2.83634	1.06082	-0.96092	1.81346	-0.0566626	-0.0178546	-0.371419
8.1	1.89718	0.0828001	1.31624	1.00415	-0.978774	1.44204	0.0476096	0.182976	0.0156908
8.2	0.611447	-1.77973	-2.04372	1.05176	-0.795798	1.45773	0.0057767	0.0112903	-0.059815
8.3	2.954	0.826002	1.40616	1.05754	-0.784508	1.39791	0.0328155	0.197521	0.217186
8.4	0.454544	-1.73185	-0.0358343	1.09036	-0.586987	1.6151	-0.00728411	0.000261133	-0.0448662
8.5	3.68754	2.91469	2.16049	1.08307	-0.586726	1.57023	0.199809	-0.298621	0.0829542
8.6	3.51729	-2.72777	-0.140651	1.28288	-0.885347	1.65319	-0.318859	0.045146	-0.141435
8.7	3.47405	-2.1439	-2.12675	0.964021	-0.840201	1.51175	0.0994165	0.160007	-0.291898
8.8	1.89484	-3.041	-2.99891	1.06344	-0.680194	1.21985	0.18661	0.0268084	-0.0190276
8.9	2.96977	0.10266	-2.77139	1.25005	-0.653386	1.20083	-0.2754	-0.106881	0.030434
9	2.63729	2.94907	0.14318	0.974647	-0.760267	1.23126	-0.256208	-0.0369367	0.050461
9.1	3.52462	-1.26454	0.529743	0.718439	-0.797203	1.28172	0.0917006	0.0536973	-0.336061
9.2	4.25299	2.59038	1.49802	0.81014	-0.743506	0.945661	-0.0263451	-0.361349	0.222739
9.3	1.83432	2.60042	-3.10212	0.783795	-1.10485	1.1684	0.157099	0.00620375	0.0944928
9.4	4.63812	-1.36865	-1.94824	0.940893	-1.09865	1.26289	-0.0343194	-0.0865659	-0.454368
9.5	2.60914	-1.48731	-2.47161	0.906574	-1.18522	0.808526	-0.0170547	-0.0135113	-0.260005
9.6	2.5815	-0.424524	-2.48867	0.889519	-1.19873	0.548521	-0.18685	-0.142908	-0.106329
9.7	1.66198	2.81381	-0.0778704	0.702669	-1.34164	0.442192	-0.156872	0.0122405	0.053506
9.8	3.59945	-0.723678	-2.1748	0.545797	-1.3294	0.495698	-0.153194	-0.222009	-0.238336
9.9	0.364481	-1.09216	2.31308	0.392603	-1.5514	0.257363	-0.0113471	0.0123742	-0.0323518
0	1.26361	-1.47872	0.265264	0	0	0	0.0112119	0.00304591	-0.125826
0.1	0.0844997	2.1424	-0.793067	0.0112119	0.00304591	-0.125826	-0.0032075	0.00325708	0.00710672
0.2	3.40963	1.74767	-1.0772	0.00800445	0.00630298	-0.118719	-0.0284244	0.0528321	0.335643
0.3	3.53988	1.80567	2.4302	-0.0204199	0.0591351	0.216924	0.0623986	-0.0537847	0.344269
0.4	3.90195	-2.60886	0.298462	0.0419787	0.0053504	0.561193	-0.321264	-0.0988374	-0.198175
0.5	3.79412	2.10888	-0.585156	-0.279285	-0.093487	0.363018	-0.162096	0.107399	0.325797
0.6	0.182556	-1.44586	1.85538	-0.441381	0.0139116	0.688815	-0.000638691	0.00218341	-0.0181133
0.7	4.70756	-2.71706	2.18599	-0.442019	0.016095	0.670702	0.247564	-0.35032	-0.193904
0.8	3.81018	-3.13137	2.89039	-0.194455	-0.334225	0.476798	0.36904	-0.0947059	-0.00389399
0.9	0.834621	0.0329411	-0.869712	0.174585	-0.428931	0.472904	0.0538077	-0.0637424	0.00274883
1	0.433436	-2.5489	2.89647	0.228393	-0.492674	0.475653	0.0348763	-0.00872454	-0.0242114
1.1	4.75494	-0.295994	-0.978514	0.263269	-0.501398	0.451441	0.253904	-0.377347	-0.138697
1.2	0.848593	-0.824724	0.267558	0.517172	-0.878745	0.312744	0.0555496	0.0152278	-0.0623173
1.3	4.07518	-3.06102	-1.84637	0.572722	-0.863517	0.250427	0.110525	0.39087	-0.0327988
1.4	1.13232	0.139806	-0.821962	0.683247	-0.472647	0.217628	0.0763346	-0.0821313	0.015779
1.5	1.50728	1.21803	1.75016	0.759582	-0.554778	0.233407	-0.00929036	0.0512406	0.141447
1.6	4.98178	-2.50907	-0.131209	0.750291	-0.503538	0.374854	-0.398347	0.0525689	-0.294513
1.7	2.80137	1.68288	0.940525	0.351944	-0.450969	0.0803405	-0.0184661	-0.0253123	0.27838
1.8	4.19259	2.81788	1.21969	0.333478	-0.476281	0.35872	-0.136708	-0.373234	0.133362
1.9	2.60528	0.474208	1.54314	0.19677	-0.849515	0.492082	0.00641029	0.231692	0.118966
2	4.14761	-0.418662	-0.475637	0.20318	-0.617823	0.611048	0.336878	-0.173518	-0.168616
2.1	0.747582	2.91438	-1.95976	0.540058	-0.791342	0.442432	0.0276216	0.0673962	0.0168402
2.2	0.341786	0.3426	-1.07533	0.56768	-0.723945	0.459272	0.0153054	-0.0283211	0.0114818
2.3	1.23805	0.193845	-1.2983	0.582985	-0.752267	0.470754	0.0326965	-0.117004	0.023849
2.4	1.32592	-2.57171	0.680718	0.615682	-0.869271	0.494603	-0.0867562	-0.0702595	-0.0715376
2.5	0.633969	-0.678826	-2.07217	0.528925	-0.93953	0.423065	-0.0237155	-0.0432695	-0.0398056
2.6	4.28077	1.68567	3.13622	0.50521	-0.9828	0.38326	0.049066	-0.000263658	0.425255
2.7	4.23697	-0.630282	-1.65731	0.554276	-0.983063	0.808515	-0.0295763	-0.341008	-0.249715
2.8	4.55564	-1.46101	-2.58425	0.5247	-1.32407	0.5588	-0.0423605	-0.0264012	-0.452822
2.9	3.34578	-1.72336	-0.907812	0.482339	-1.35047	0.105978	-0.0312946	0.0400751	-0.330692
3	3.17989	-3.08787	1.6451	0.451045	-1.3104	-0.224714	0.0235719	-0.316654	-0.0170738
3.1	4.44735	2.91667	1.46151	0.474616	-1.62705	-0.241787	-0.0472858	-0.430947	0.0991878
3.2	2.88367	2.26248	-2.48447	0.427331	-2.058	-0.1426	0.145627	0.112353	0.222093
3.3	0.587578	0.864316	-2.18648	0.572958	-1.94565	0.0794929	-0.0220283	-0.0311394	0.0446942
3.4	1.62323	0.526023	-0.663131	0.550929	-1.97678	0.124187	0.110628	-0.0864155	0.0815022
3.5	3.65559	0.272491	0.636703	0.661558	-2.0632	0.205689	0.283086	0.209323	0.0983834
3.6	0.936457	2.87614	2.82057	0.944644	-1.85388	0.304073	0.0857492	-0.0285137	0.0245676
3.7	0.388823	-0.37376	1.24707	1.03039	-1.88239	0.32864	0.0115146	0.0343176	-0.0141967
3.8	0.544385	-0.147665	-0.0946796	1.04191	-1.84807	0.314444	0.0536049	-0.00509051	-0.00800949
3.9	4.55296	-2.89955	1.01045	1.09551	-1.85316	0.306434	-0.234927	-0.374427	-0.109127
4	2.37147	-1.52425	2.89748	0.860586	-2.22759	0.197307	-0.0107073	0.00266697	-0.23689
4.1	4.94929	-1.90193	-2.13338	0.849878	-2.22492	-0.0395832	0.0858259	0.136111	-0.468041
4.2	1.98473	-2.7905	1.84954	0.935704	-2.08881	-0.507624	0.0512776	-0.179173	-0.06826
4.3	3.66464	1.9745	1.79778	0.986982	-2.26798	-0.575884	0.0323957	-0.140263	0.337006
4.4	0.425529	0.15682	-0.413515	1.01938	-2.40825	-0.238879	0.0384881	-0.0168892	0.00664584
4.5	1.60267	2.82654	1.25304	1.05787	-2.42514	-0.232233	-0.0476086	-0.144751	0.0496609
4.6	3.61607	-1.75955	3.01579	1.01026	-2.56989	-0.182572	0.0673122	-0.00851286	-0.355185
4.7	0.53568	-0.887149	-1.62405	1.07757	-2.5784	-0.537757	-0.0018009	-0.0337869	-0.0415299
4.8	3.13134	0.608966	-1.20596	1.07577	-2.61219	-0.579287	0.0916405	-0.239941	0.179119
4.9	0.0607538	-0.318853	-0.579713	1.16741	-2.85213	-0.400168	0.00482659	-0.00316025	-0.0019045
5	4.54702	2.97971	0.0847042	1.17224	-2.85529	-0.402072	-0.447148	-0.0379662	0.0732871
5.1	1.48019	2.1214	0.00441521	0.725088	-2.89325	-0.328785	-0.0774427	-0.000341928	0.126143
5.2	0.339606	2.55166	0.228858	0.647645	-2.8936	-0.202642	-0.0274847	-0.00640227	0.0188924
5.3	4.41972	-0.17451	0.703233	0.62016	-2.9	-0.18375	0.331996	0.281476	-0.0767374
5.4	2.46535	3.01855	1.50037	0.952156	-2.61852	-0.260487	-0.0172173	-0.244064	0.0302567
5.5	0.883191	-2.34067	-0.64081	0.934939	-2.86259	-0.230231	-0.0492784	0.036752	-0.0634128
5.6	1.25253	2.92954	1.08602	0.885661	-2.82584	-0.293644	-0.0570613	-0.108339	0.0263618
5.7	2.70763	1.86692	-2.92511	0.828599	-2.93417	-0.267282	0.0771687	0.0169713	0.258978
5.8	4.75018	2.26107	-2.71809	0.905768	-2.9172	-0.0083035	0.275745	0.1243	0.366273
5.9	1.43798	3.07669	-2.79952	1.18151	-2.7929	0.35797	0.135181	0.0481344	0.0093265
6	4.04178	-1.59499	-2.27897	1.31669	-2.74477	0.367296	0.00636073	0.00742763	-0.404059
6.1	3.96182	1.43953	2.69629	1.32305	-2.73734	-0.0367632	-0.0468005	0.0223368	0.392774
6.2	1.01936	1.09843	-0.507677	1.27625	-2.715	0.35601	0.040531	-0.0225479	0.0907733
6.3	1.08508	-0.369267	-1.95779	1.31678	-2.73755	0.446784	-0.0381913	-0.0937103	-0.039164
6.4	3.42096	-1.1201	0.703139	1.27859	-2.83126	0.40762	0.113671	0.0963555	-0.307936
6.5	3.95035	0.50994	-1.28656	1.39226	-2.73491	0.0996842	0.0966822	-0.330943	0.192826
6.6	3.91864	2.20764	-2.12556	1.48895	-3.06585	0.29251	0.122745	0.198078	0.315049
6.7	4.23849	0.259144	0.159212	1.61169	-2.86777	0.607559	0.404515	0.0649532	0.108613
6.8	4.66131	3.10548	0.0216173	2.01621	-2.80282	0.716172	-0.465718	-0.0100691	0.016831
6.9	1.49562	1.07875	-2.54607	1.55049	-2.81289	0.733003	-0.058494	-0.0396343	0.131819
7	3.2457	-3.00737	1.52132	1.49199	-2.85252	0.864822	-0.0159066	-0.321257	-0.0434353
7.1	2.40743	1.32037	3.05868	1.47609	-3.17378	0.821387	-0.0594555	0.00494118	0.233233
7.2	1.79247	-1.51347	-0.678634	1.41663	-3.16884	1.05462	0.00799486	-0.00644709	-0.178952
7.3	3.19284	-0.185346	0.449063	1.42463	-3.17528	0.875668	0.282702	0.136234	-0.0588397
7.4	0.407825	-2.70887	-2.5361	1.70733	-3.03905	0.816828	0.0304416	0.0210724	-0.0171019
7.5	0.895374	0.534895	0.734322	1.73777	-3.01798	0.799726	0.057179	0.0516172	0.0456418
7.6	2.53397	1.79105	2.17045	1.79495	-2.96636	0.845368	0.0312434	-0.0457023	0.247275
7.7	3.95341	-0.94328	2.46127	1.82619	-3.01206	1.09264	-0.180443	0.146012	-0.320024
7.8	1.49257	2.43933	-0.0585023	1.64575	-2.86605	0.772619	-0.113746	0.00666201	0.0964118
7.9	4.50428	-1.98391	0.29398	1.532	-2.85939	0.869031	-0.173072	-0.0523979	-0.412536
8	4.85803	-2.21314	-2.77556	1.35893	-2.91179	0.456496	0.271753	0.104164	-0.388978
8.1	0.555144	-0.218767	-0.0792042	1.63069	-2.80762	0.0675171	0.0540214	-0.00428769	-0.0120481
8.2	3.20367	0.729113	-2.06656	1.68471	-2.81191	0.055469	-0.113655	-0.210154	0.213431
8.3	0.472087	-0.902954	1.97199	1.57105	-3.02206	0.2689	-0.0114172	0.0269145	-0.0370664
8.4	4.62408	-0.891566	-1.5538	1.55963	-2.99515	0.231834	0.0049364	-0.290441	-0.35978
8.5	0.883014	1.27705	1.36543	1.56457	-3.28559	-0.127946	0.00521384	0.0250298	0.084519
8.6	3.32514	-1.95029	-2.60337	1.56978	-3.26056	-0.043427	0.105765	0.0631433	-0.308856
8.7	2.41383	-0.204269	0.709457	1.67555	-3.19742	-0.352283	0.179333	0.153973	-0.048965
8.8	2.04832	-0.674619	2.49189	1.85488	-3.04344	-0.401248	-0.127372	0.0967694	-0.127938
8.9	3.79	2.01147	-1.07919	1.72751	-2.94667	-0.529186	-0.0763112	0.142516	0.342793
9	0.468205	-2.24615	-1.6995	1.6512	-2.80416	-0.186393	0.00375697	0.0290287	-0.0365429
9.1	4.32038	3.03631	2.90418	1.65496	-2.77513	-0.222936	0.417594	-0.101048	0.0454022
9.2	4.00537	-2.18502	0.0468955	2.07255	-2.87618	-0.177534	-0.230584	-0.0108213	-0.327328
9.3	2.19078	2.30886	-2.27323	1.84197	-2.887	-0.504862	0.0952367	0.112512	0.162069
9.4	2.64552	1.7869	0.67183	1.9372	-2.77449	-0.342793	-0.0443992	-0.0353079	0.258398
9.5	1.82015	2.25181	-2.4095	1.8928	-2.80979	-0.0843949	0.0852319	0.0765967	0.141413
9.6	0.641639	-0.548401	-0.768534	1.97804	-2.7332	0.0570186	0.0393649	-0.0380591	-0.0334501
9.7	2.23208	3.09	-2.77081	2.0174	-2.77126	0.0235685	0.207763	0.0807709	0.0115113
9.8	2.47929	-1.90945	-1.26766	2.22516	-2.69049	0.0350797	-0.0245876	0.0786112	-0.233847
9.9	4.95231	-2.48835	-1.57014	2.20058	-2.61187	-0.198768	-0.000258542	0.393274	-0.300982
0	1.2783	1.63653	-0.565063	0	0	0	-0.0070917	0.00449632	0.127554
0.1	1.85871	1.83008	1.61284	-0.0070917	0.00449632	0.127554	0.00200287	-0.0476136	0.179658
0.2	3.3756	-1.04782	-0.261617	-0.00508884	-0.0431173	0.307211	0.162862	-0.0436071	-0.29244
0.3	1.18959	2.13662	-2.89118	0.157774	-0.0867244	0.0147711	0.0617864	0.0158037	0.100419
0.4	3.01432	1.56591	2.63045	0.21956	-0.0709207	0.11519	-0.00128533	0.000720888	0.301428
0.5	2.52377	-1.15087	-0.764334	0.218275	-0.0701998	0.416618	0.0742721	-0.0712072	-0.230451
0.6	2.47114	-1.13565	1.68906	0.292547	-0.141407	0.186167	-0.0122905	0.103443	-0.224084
0.7	3.98586	-0.194685	1.41485	0.280256	-0.0379645	-0.0379169	0.0607356	0.386311	-0.0771097
0.8	0.6082	-1.03336	-1.47423	0.340992	0.348347	-0.115027	0.00300204	-0.030991	-0.0522458
0.9	2.93424	-1.43644	2.5646	0.343994	0.317356	-0.167272	-0.0329423	0.0214413	-0.290779
1	3.45594	-1.47619	0.684868	0.311052	0.338797	-0.458052	0.0252847	0.0206512	-0.344049
1.1	3.96097	3.12565	0.472365	0.336336	0.359448	-0.802101	-0.352677	-0.180199	0.00631271
1.2	2.60613	1.23865	-1.1027	-0.0163412	0.179249	-0.795788	0.0383414	-0.075838	0.246369
1.3	4.37553	3.05948	1.37314	0.0220002	0.103411	-0.549419	-0.0856327	-0.427589	0.0358862
1.4	1.45483	2.32012	-0.598035	-0.0636325	-0.324177	-0.513533	-0.0818962	0.0557922	0.106515
1.5	0.0115595	0.42458	0.348192	-0.145529	-0.268385	-0.407018	0.00099011	0.000359391	0.000476181
1.6	4.91245	-2.64671	-0.433052	-0.144539	-0.268026	-0.406541	-0.3924	0.181415	-0.233308
1.7	4.47806	1.65303	-2.59685	-0.536939	-0.0866109	-0.639849	0.031459	0.0190608	0.446293
1.8	4.25764	-0.136187	-1.27254	-0.50548	-0.0675501	-0.193557	0.123954	-0.403199	-0.0578045
1.9	2.45379	-2.87257	-2.20857	-0.381526	-0.470749	-0.251361	0.140845	0.190053	-0.0652186
2	4.49994	-2.3652	-1.04679	-0.240681	-0.280696	-0.31658	-0.160635	0.277969	-0.315315
2.1	1.83044	2.89758	2.40894	-0.401316	-0.00272646	-0.631896	0.132044	-0.118802	0.0442226
2.2	1.39179	0.847583	2.93932	-0.269272	-0.121528	-0.587673	-0.0902306	0.018504	0.10434
2.3	2.78582	-0.582997	2.35637	-0.359503	-0.103024	-0.483333	-0.164477	0.16442	-0.153367
2.4	4.23151	0.634271	0.700266	-0.523979	0.0613956	-0.6367	0.260638	0.219651	0.250756
2.5	2.9509	0.0213726	2.26915	-0.263341	0.281047	-0.385944	-0.189687	0.225959	0.00630637
2.6	1.3846	0.751229	0.666717	-0.453028	0.507005	-0.379638	0.0795237	0.0625791	0.0945044
2.7	3.70587	-0.267468	-0.461248	-0.373504	0.569584	-0.285133	0.32006	-0.159071	-0.0979426
2.8	1.62777	3.07373	0.935468	-0.0534443	0.410513	-0.383076	-0.0963761	-0.130714	0.0110388
2.9	2.28025	-0.648155	0.442002	-0.14982	0.2798	-0.372037	0.164311	0.0777567	-0.137662
3	3.26242	0.897073	-1.53754	0.0144909	0.357556	-0.5097	0.00676773	-0.20343	0.254959
3.1	2.56507	-1.89478	-0.886681	0.0212586	0.154127	-0.25474	-0.0516067	0.063283	-0.243162
3.2	1.59343	2.99592	-3.13888	-0.030348	0.21741	-0.497902	0.157655	0.000428357	0.0231292
3.3	0.573318	-1.99483	2.2146	0.127307	0.217838	-0.474773	0.0141588	-0.0188667	-0.0522543
3.4	1.33609	-1.77482	-2.74769	0.141465	0.198972	-0.527027	0.0249972	0.0103895	-0.130838
3.5	4.4898	0.509302	1.79647	0.166463	0.209361	-0.657865	-0.0877148	0.382058	0.218908
3.6	2.03895	-2.04725	1.14869	0.0787478	0.591419	-0.438956	-0.0383098	-0.0853042	-0.181187
3.7	3.38785	-1.26597	1.98378	0.0404379	0.506115	-0.620143	-0.0408082	0.0931301	-0.323167
3.8	4.97079	2.17029	-1.63911	-0.000370283	0.599245	-0.94331	0.0191448	0.279809	0.4104
3.9	4.64399	-1.5369	0.699424	0.0187745	0.879054	-0.532911	0.0120446	0.0101331	-0.464133
4	3.80332	1.45586	-1.67702	0.0308191	0.889187	-0.997043	-0.00462458	-0.0433718	0.377823
4.1	4.8221	-0.111648	-1.25474	0.0261945	0.845815	-0.619221	0.148947	-0.455472	-0.0537263
4.2	4.88298	2.4063	2.52203	0.175142	0.390343	-0.672947	0.29483	-0.210286	0.327551
4.3	3.38938	-1.76362	3.12068	0.469972	0.180057	-0.345396	0.0649374	-0.00135848	-0.332656
4.4	4.90856	-2.54964	0.481765	0.53491	0.178698	-0.678053	-0.360975	-0.188738	-0.273887
4.5	1.22434	1.13689	1.44993	0.173934	-0.0100401	-0.951939	0.00620636	0.051098	0.111088
4.6	4.56438	-1.61959	0.377766	0.180141	0.0410579	-0.840851	-0.0206912	-0.00821079	-0.455895
4.7	2.78387	0.180318	-2.59087	0.15945	0.0328471	-1.29675	-0.23338	-0.143319	0.0499266
4.8	3.85996	1.4957	-2.4312	-0.0739304	-0.110472	-1.24682	-0.0219536	-0.0188848	0.384909
4.9	1.90806	2.45673	0.793276	-0.095884	-0.129357	-0.861911	-0.103671	-0.105317	0.120697
5	0.150435	2.25847	-0.751696	-0.199555	-0.234674	-0.741214	-0.00697571	0.00652068	0.0116245
5.1	3.37757	3.00006	-2.96851	-0.20653	-0.228153	-0.729589	0.329383	0.0575856	0.0476447
5.2	0.814019	-2.74486	0.404335	0.122853	-0.170567	-0.681945	-0.0690251	-0.0295367	-0.0314546
5.3	2.33442	1.06726	-0.774486	0.053828	-0.200104	-0.713399	0.0805147	-0.0787765	0.204468
5.4	1.04638	1.61796	3.03933	0.134343	-0.27888	-0.508932	0.00490754	-0.000503609	0.104522
5.5	1.93623	2.58906	-2.94646	0.13925	-0.279384	-0.40441	0.161684	0.0319564	0.101621
5.6	2.19943	0.106666	-0.956129	0.300934	-0.247428	-0.302788	0.126117	-0.178665	0.0234159
5.7	4.3791	-1.66243	-2.09945	0.427051	-0.426092	-0.279372	0.0202107	0.0346009	-0.436073
5.8	1.71442	1.55825	2.58842	0.447262	-0.391491	-0.715446	-0.00183034	0.00113019	0.171429
5.9	0.208709	-2.91734	-2.65579	0.445432	-0.390361	-0.544017	0.017994	0.00950109	-0.00464117
6	4.9411	-0.873524	-1.58713	0.463426	-0.38086	-0.548658	-0.00518284	-0.31724	-0.378783
6.1	4.37545	2.45577	0.63085	0.458243	-0.6981	-0.927441	-0.27344	-0.199725	0.277103
6.2	3.72609	1.07159	2.22752	0.184802	-0.897826	-0.650338	-0.108904	0.141275	0.327137
6.3	2.30405	0.197423	-0.481533	0.0758985	-0.756551	-0.323201	0.200238	-0.104637	0.0451924
6.4	3.74947	1.91483	2.2078	0.276137	-0.861188	-0.278009	0.0752205	-0.101664	0.352976
6.5	4.67279	1.45129	-1.98208	0.351357	-0.962852	0.0749671	-0.0222716	-0.0510627	0.463946
6.6	1.74302	-2.07671	1.53627	0.329086	-1.01391	0.538914	-0.00291612	-0.0844181	-0.152468
6.7	1.44647	0.318752	1.24562	0.326169	-1.09833	0.386446	0.0438841	0.130162	0.0453298
6.8	2.42027	-1.333	1.00919	0.370054	-0.96817	0.431776	0.0303612	0.0482546	-0.235217
6.9	3.29302	-0.852261	-0.586962	0.400415	-0.919916	0.196559	0.180492	-0.120057	-0.247889
7	3.13326	0.77548	2.83527	0.580906	-1.03997	-0.05133	-0.213326	0.0674712	0.219347
7.1	1.92056	2.54756	-2.03798	0.367581	-0.972501	0.168017	0.0716789	0.1421	0.107495
7.2	4.5131	-1.51456	0.838578	0.43926	-0.830402	0.275512	0.0169581	0.0188649	-0.450597
7.3	3.25284	-0.725902	2.66921	0.456218	-0.811537	-0.175085	-0.216637	0.110696	-0.215927
7.4	4.83923	-2.87766	2.87612	0.23958	-0.700841	-0.391012	0.4508	-0.122566	-0.126248
7.5	1.31098	-2.5976	-1.86441	0.69038	-0.823407	-0.51726	0.0324643	0.107373	-0.0678508
7.6	1.77644	0.136158	-3.07144	0.722844	-0.716034	-0.585111	-0.175567	-0.0123361	0.0241131
7.7	4.14347	-1.20625	1.86885	0.547277	-0.72837	-0.560997	-0.0433814	0.141211	-0.387118
7.8	2.59457	-0.363369	0.787923	0.503896	-0.587159	-0.948116	0.171051	0.171917	-0.0922177
7.9	0.63167	3.01656	-2.05026	0.674947	-0.415242	-1.04033	0.0289115	0.0556071	0.00787709
8	0.0872337	2.2428	-0.623618	0.703859	-0.359635	-1.03246	-0.00440853	0.00317143	0.00682672
8.1	4.0681	1.13568	2.84633	0.69945	-0.356464	-1.02563	-0.164057	0.0498984	0.368904
8.2	1.39773	-1.7522	0.782681	0.535393	-0.306565	-0.656726	-0.0178794	-0.0177825	-0.137479
8.3	0.0514552	-2.17344	2.85447	0.517514	-0.324348	-0.794205	0.0027972	-0.000825975	-0.00423908
8.4	0.316263	-2.2713	-0.711144	0.520311	-0.325174	-0.798444	-0.015445	0.0133062	-0.0241789
8.5	1.49357	-0.684626	-2.02182	0.504866	-0.311867	-0.822623	-0.0504319	-0.10413	-0.0944509
8.6	4.33452	-3.09503	1.89107	0.454434	-0.415998	-0.917074	0.136315	-0.410965	-0.0201745
8.7	4.76236	0.813659	1.65566	0.590749	-0.826963	-0.937248	-0.0277262	0.325923	0.346131
8.8	4.81775	-0.0167778	-2.064	0.563023	-0.50104	-0.591118	-0.228064	-0.424298	-0.00808274
8.9	1.50411	0.965988	-2.74346	0.334959	-0.925338	-0.599201	-0.0788355	-0.0331574	0.12373
9	1.13983	0.237418	-1.13039	0.256124	-0.958495	-0.475471	0.047229	-0.100214	0.0268082
9.1	3.43292	0.210398	-0.0548326	0.303353	-1.05871	-0.448662	0.335217	-0.0183993	0.0716962
9.2	0.730461	2.26947	-1.43935	0.63857	-1.07711	-0.376966	-0.00615801	0.0465779	0.0559312
9.3	1.24081	0.353041	-2.50701	0.632412	-1.03053	-0.321035	-0.0937619	-0.0690236	0.0429013
9.4	3.37811	-1.43836	2.76102	0.53865	-1.09955	-0.278134	-0.0414157	0.0165697	-0.334853
9.5	2.99219	1.64229	-3.01094	0.497234	-1.08298	-0.612987	0.0211921	0.00278457	0.298454
9.6	2.49943	2.12388	-2.18013	0.518426	-1.0802	-0.314532	0.075145	0.107668	0.212679
9.7	3.30111	1.67705	-1.44585	0.593571	-0.972532	-0.101854	-0.00436309	0.0347365	0.328249
9.8	4.53054	-2.95533	-1.06821	0.589208	-0.937795	0.226396	-0.214459	0.390161	-0.0839
9.9	4.12499	-0.00588159	-1.08233	0.374749	-0.547634	0.142496	0.193569	-0.364256	-0.00242654
0	4.81505	1.9133	1.48143	0	0	0	-0.0144328	-0.161065	0.453538
0.1	1.47754	1.85559	1.02742	-0.0144328	-0.161065	0.453538	-0.0214637	-0.0355343	0.141802
0.2	2.34723	-1.48557	1.88914	-0.0358965	-0.1966	0.59534	-0.0062541	0.0189776	-0.233871
0.3	1.24098	-0.0881196	-1.196	-0.0421506	-0.177622	0.361469	0.0452533	-0.115035	-0.0109213
0.4	4.08356	3.00761	-1.26077	0.0031027	-0.292658	0.350548	-0.123466	0.385403	0.0545472
0.5	4.3571	-2.26913	0.23929	-0.120363	0.0927456	0.405095	-0.272154	-0.0663959	-0.333717
0.6	1.25625	-0.33637	0.610016	-0.392517	0.0263497	0.0713776	0.0971966	0.0679348	-0.0414641
0.7	1.37052	-1.61951	1.70441	-0.295321	0.0942845	0.0299135	0.000889009	-0.00661402	-0.136889
0.8	1.30242	-1.29187	1.84712	-0.294432	0.0876705	-0.106976	-0.00978288	0.0344985	-0.125208
0.9	2.27728	0.520802	-1.57884	-0.304215	0.122169	-0.232184	-0.00158797	-0.197529	0.113312
1	3.37489	-1.13009	-2.89643	-0.305803	-0.0753602	-0.118872	-0.139661	-0.0349422	-0.305242
1.1	0.775866	-2.14984	2.25994	-0.445463	-0.110302	-0.424114	0.0269977	-0.0327681	-0.0649389
1.2	4.95193	-1.68145	0.294284	-0.418465	-0.14307	-0.489053	-0.0523301	-0.0158604	-0.492165
1.3	2.19242	0.0970454	-1.57209	-0.470795	-0.158931	-0.981218	-0.000282145	-0.21821	0.021243
1.4	1.49182	2.84294	-3.11692	-0.471078	-0.377141	-0.959975	0.142535	0.00351743	0.0438945
1.5	3.42881	-0.116135	1.54728	-0.328543	-0.373623	-0.916081	0.00800738	0.340477	-0.039731
1.6	3.20247	-1.52305	1.61298	-0.320536	-0.0331464	-0.955812	-0.000644562	0.0152704	-0.319882
1.7	2.95436	0.993891	-2.78377	-0.32118	-0.017876	-1.27569	-0.150935	-0.0564365	0.247621
1.8	4.33887	1.659	0.136551	-0.472115	-0.0743124	-1.02807	-0.0378646	-0.00520284	0.4322
1.9	4.98753	1.48068	1.49419	-0.509979	-0.0795153	-0.595872	0.00343502	0.044755	0.496729
2	4.79561	2.07404	-0.646247	-0.506544	-0.0347603	-0.0991429	-0.18464	0.139273	0.420107
2.1	1.63114	-2.54235	2.1648	-0.691184	0.104513	0.320964	0.0753864	-0.111621	-0.0919993
2.2	1.95497	-1.22988	-1.73419	-0.615797	-0.00710838	0.228964	-0.0106329	-0.0644941	-0.184246
2.3	4.5433	0.0714065	0.141138	-0.62643	-0.0716025	0.0447185	0.448666	0.0637478	0.0324146
2.4	1.56204	-0.584537	0.0874154	-0.177764	-0.00785472	0.0771331	0.129772	0.011373	-0.0861955
2.5	0.940838	0.99347	-0.815586	-0.0479923	0.00351833	-0.00906241	0.0351972	-0.0373891	0.0788351
2.6	4.54071	0.791067	-1.11316	-0.0127951	-0.0338707	0.0697727	0.141055	-0.2864	0.322892
2.7	0.986204	0.411136	-0.592726	0.12826	-0.320271	0.392665	0.0749814	-0.0505008	0.0394137
2.8	3.86532	1.10956	1.6575	0.203241	-0.370772	0.432078	-0.014896	0.171381	0.346141
2.9	1.99894	-1.22278	-0.829291	0.188345	-0.19939	0.77822	0.0460422	-0.0502724	-0.18791
3	2.49935	-0.92635	-2.06594	0.234387	-0.249663	0.590309	-0.0713452	-0.132117	-0.199806
3.1	0.0930209	-1.58074	2.98838	0.163042	-0.38178	0.390503	9.14021e-05	-1.41146e-05	-0.00930163
3.2	0.0782263	1.93411	1.17429	0.163134	-0.381794	0.381201	-0.00107362	-0.00256426	0.00731201
3.3	1.18432	2.79106	-2.91378	0.16206	-0.384358	0.388513	0.108356	0.0251214	0.0406694
3.4	4.01033	-2.66675	-1.51065	0.270416	-0.359237	0.429183	-0.0214407	0.356019	-0.183352
3.5	1.57949	-1.73842	-2.22207	0.248975	-0.00321755	0.245831	0.0159745	0.020958	-0.155735
3.6	0.410674	1.62151	2.78992	0.26495	0.0177405	0.0900956	0.00195452	-0.000717171	0.0410146
3.7	1.75907	-1.18687	-0.796138	0.266904	0.0170233	0.13111	0.0460867	-0.0470874	-0.163101
3.8	1.57579	-0.298809	0.743317	0.312991	-0.0300641	-0.0319906	0.110873	0.101914	-0.0463885
3.9	3.7494	2.2386	0.570473	0.423864	0.0718495	-0.0783791	-0.195418	-0.125387	0.294397
4	0.95756	0.725269	-0.12861	0.228446	-0.0535376	0.216018	0.0710644	-0.00919032	0.0635185
4.1	2.84574	2.45867	-0.934043	0.299511	-0.062728	0.279536	-0.131257	0.177492	0.179585
4.2	2.02889	-3.0262	-1.64174	0.168254	0.114764	0.459121	0.0142864	0.201033	-0.0233604
4.3	1.20902	1.63859	-2.83013	0.18254	0.315797	0.435761	0.0077965	0.00250999	0.120624
4.4	2.12573	-2.58628	0.519025	0.190337	0.318307	0.556385	-0.156842	-0.0895988	-0.112071
4.5	4.89401	-3.03476	-1.13137	0.0334947	0.228708	0.444314	-0.207015	0.440381	-0.0521823
4.6	0.754528	-1.13796	-1.15905	-0.17352	0.669089	0.392131	0.0126659	-0.0290033	-0.0684946
4.7	3.65546	-1.308	2.75829	-0.160854	0.640086	0.323637	-0.0880701	0.035514	-0.352997
4.8	3.93217	0.851866	2.55154	-0.248924	0.6756	-0.0293598	-0.215176	0.144091	0.2959
4.9	0.576441	-3.11379	-2.86359	-0.464101	0.81969	0.26654	0.0554095	0.0158137	-0.00160237
5	4.63107	0.383072	0.619526	-0.408691	0.835504	0.264938	0.349713	0.249413	0.173096
5.1	1.22645	-1.78933	3.13765	-0.0589786	1.08492	0.438034	0.0265888	-0.000104918	-0.119728
5.2	3.3861	-0.304669	-2.48257	-0.0323897	1.08481	0.318307	-0.255374	-0.197796	-0.101575
5.3	2.08751	2.87106	0.650942	-0.287764	0.887016	0.216731	-0.160024	-0.121889	0.0557877
5.4	1.14486	-1.9241	1.49538	-0.447788	0.765126	0.272519	-0.00298451	-0.0394997	-0.107414
5.5	4.70836	-1.78405	1.69375	-0.450773	0.725627	0.165105	0.0122217	-0.0988974	-0.46017
5.6	4.60048	1.68289	-1.03486	-0.438551	0.626729	-0.295065	-0.0262771	0.0442438	0.457161
5.7	2.32716	1.83066	-2.32015	-0.464828	0.670973	0.162096	0.0407301	0.0437779	0.224902
5.8	0.534772	-1.71361	2.33424	-0.424098	0.714751	0.386999	0.00526276	-0.00549903	-0.0529327
5.9	2.56405	0.60999	1.25417	-0.418835	0.709252	0.334066	0.0654374	0.199717	0.146884
6	1.93256	-2.95165	1.10233	-0.353398	0.908969	0.48095	-0.0856889	-0.169334	-0.0364867
6.1	0.821276	1.90258	2.47111	-0.439087	0.739634	0.444463	0.0209603	-0.0166225	0.0776485
6.2	0.124433	2.84855	0.546886	-0.418126	0.723012	0.522112	-0.0101753	-0.00619505	0.00359441
6.3	0.836272	-0.323211	-2.9482	-0.428302	0.716817	0.525706	-0.0778187	-0.0152399	-0.0265611
6.4	3.06476	-2.96776	0.901753	-0.50612	0.701577	0.499145	-0.187223	-0.236781	-0.0530068
6.5	2.7435	-0.280988	-2.10121	-0.693343	0.464796	0.446138	-0.133347	-0.227373	-0.0760787
6.6	2.22203	2.79024	-2.35031	-0.82669	0.237423	0.37006	0.146652	0.148388	0.0764743
6.7	2.49233	-1.58869	-2.11713	-0.680038	0.38581	0.446534	0.00231674	0.00380998	-0.249193
6.8	0.622177	-0.450838	-2.51141	-0.677721	0.38962	0.197341	-0.0452443	-0.0330009	-0.0271095
6.9	4.42652	1.50869	2.83175	-0.722965	0.356619	0.170232	-0.0261673	0.00837753	0.441798
7	3.46888	-0.263959	3.07771	-0.749132	0.364997	0.612029	-0.33419	0.0213787	-0.0905047
7.1	2.4144	0.343433	-0.492021	-1.08332	0.386376	0.521525	0.200373	-0.107398	0.0812981
7.2	4.61926	-3.09487	0.78431	-0.882949	0.278978	0.602823	-0.326629	-0.32592	-0.0215758
7.3	0.325843	0.444107	-2.26445	-1.20958	-0.0469415	0.581247	-0.018812	-0.0226241	0.0139999
7.4	2.21375	-0.693458	1.44694	-1.22839	-0.0695656	0.595247	0.0210321	0.168942	-0.141503
7.5	4.42151	0.479072	-2.78454	-1.20736	0.0993766	0.453744	-0.367629	-0.13714	0.203812
7.6	1.99752	-3.0274	1.68447	-1.57499	-0.0377637	0.657556	0.0225092	-0.19717	-0.0227611
7.7	2.36087	0.0951955	-0.87793	-1.55248	-0.234934	0.634795	0.150117	-0.180828	0.0224405
7.8	0.9563	-0.425523	1.64136	-1.40236	-0.415761	0.657236	-0.00614145	0.0868852	-0.0394758
7.9	1.56798	0.780116	-2.84824	-1.4085	-0.328876	0.61776	-0.106696	-0.0322292	0.110286
8	2.78237	-1.08095	-1.66994	-1.5152	-0.361105	0.728046	-0.0129575	-0.130265	-0.245517
8.1	3.42473	-0.89925	-1.90898	-1.52816	-0.49137	0.482528	-0.0706968	-0.201016	-0.268109
8.2	2.13525	-1.71254	-0.585256	-1.59885	-0.692387	0.214419	-0.0251443	0.0166633	-0.211383
8.3	1.29192	3.06511	0.774462	-1.624	-0.675723	0.00303594	-0.0920765	-0.0900842	0.00987126
8.4	4.65718	-0.590547	-0.991839	-1.71607	-0.765808	0.0129072	0.211661	-0.3238	-0.259319
8.5	0.0229399	-0.951702	-0.0362119	-1.50441	-1.08961	-0.246412	0.00133032	-4.81946e-05	-0.00186823
8.6	2.78153	1.8406	2.39693	-1.50308	-1.08966	-0.24828	0.0545157	-0.0502455	0.268091
8.7	0.432202	2.89706	-2.09544	-1.44857	-1.1399	0.019811	0.0210053	0.0362943	0.0104635
8.8	1.10514	-2.49551	-2.05509	-1.42756	-1.10361	0.0302745	0.0410832	0.0780923	-0.0665369
8.9	1.87632	2.57593	2.77572	-1.38648	-1.02551	-0.0362623	0.147921	-0.0566716	0.100566
9	0.608393	-3.05068	-0.339852	-1.23856	-1.08219	0.0643037	-0.0571226	0.0201969	-0.00552352
9.1	3.13594	0.621156	-1.7671	-1.29568	-1.06199	0.0587802	-0.04974	-0.250119	0.182504
9.2	4.35684	2.87007	-2.42689	-1.34542	-1.31211	0.241285	0.317012	0.275082	0.116851
9.3	1.85311	0.14311	2.89699	-1.02841	-1.03703	0.358135	-0.177957	0.0444174	0.0264293
9.4	3.70436	3.00087	-1.91422	-1.20636	-0.992609	0.384565	0.123499	0.345357	0.0519568
9.5	1.74885	-1.47148	1.64283	-1.08287	-0.647252	0.436521	-0.00124812	0.017296	-0.174023
9.6	2.82763	1.1552	-1.32756	-1.08411	-0.629956	0.262498	0.0274951	-0.1108	0.258694
9.7	0.347869	1.67557	-0.0663159	-1.05662	-0.740756	0.521192	-0.00362997	0.000241078	0.0345962
9.8	0.67104	1.16937	1.77659	-1.06025	-0.740515	0.555788	-0.00535788	0.0256665	0.0617695
9.9	1.19119	2.78539	0.83455	-1.06561	-0.714848	0.617558	-0.074964	-0.0827219	0.0415393
0	2.98954	-0.104575	0.61204	0	0	0	0.24335	0.170822	-0.031206
0.1	2.38406	2.44314	2.36263	0.24335	0.170822	-0.031206	0.129932	-0.128271	0.153303
0.2	2.80715	1.8277	0.0694234	0.373282	0.0425509	0.122097	-0.071153	-0.00494763	0.271503
0.3	0.943569	-1.79944	2.35823	0.302129	0.0376033	0.3936	0.0151534	-0.0150918	-0.0919013
0.4	3.00397	-1.67726	0.335784	0.317282	0.0225116	0.301698	-0.0301388	-0.0105185	-0.298696
0.5	2.98829	1.79522	-0.863826	0.287144	0.0119931	0.00300273	-0.0431961	0.0505647	0.291335
0.6	2.36241	-2.29552	-1.34449	0.243947	0.0625578	0.294337	-0.03514	0.152617	-0.17687
0.7	3.4369	0.371072	-1.92882	0.208807	0.215175	0.117467	-0.112241	-0.299988	0.124627
0.8	3.15047	-2.80951	-1.0841	0.0965661	-0.0848128	0.242094	-0.139301	0.26325	-0.102711
0.9	1.16373	-2.48913	-0.999769	-0.0427346	0.178437	0.139383	-0.0499794	0.0777987	-0.0706552
1	2.37874	-1.99742	1.51049	-0.0927139	0.256236	0.0687282	-0.00593242	-0.0982529	-0.216553
1.1	4.20706	0.73905	2.59878	-0.0986463	0.157983	-0.147824	-0.266252	0.160619	0.283382
1.2	0.774519	-0.24137	1.2618	-0.364898	0.318602	0.135557	0.0228708	0.0716448	-0.0185136
1.3	2.31708	-2.33665	1.90846	-0.342027	0.390247	0.117044	0.0532072	-0.15154	-0.167013
1.4	1.36095	-2.26462	2.77027	-0.28882	0.238707	-0.0499695	0.0810988	-0.0315783	-0.104631
1.5	1.13357	-0.414109	-1.30104	-0.207721	0.207129	-0.154601	0.0276558	-0.100022	-0.0456118
1.6	0.837528	1.93553	1.18797	-0.180066	0.107107	-0.200212	-0.0111596	-0.0277124	0.0782433
1.7	4.85788	1.43632	-0.152258	-0.191225	0.0793942	-0.121969	0.064376	-0.00987821	0.481402
1.8	0.980453	2.77061	1.12767	-0.126849	0.069516	0.359433	-0.0391786	-0.0825499	0.0355447
1.9	4.78372	-2.31338	-2.78514	-0.166028	-0.013034	0.394978	0.303139	0.112876	-0.352428
2	0.573265	-0.611156	-1.60239	0.137111	0.0998421	0.0425498	-0.001483	-0.0469261	-0.0328948
2.1	2.10773	1.22533	-2.53627	0.135628	0.052916	0.00965505	-0.0586927	-0.0406145	0.198321
2.2	1.38669	-0.234035	1.67988	0.0769352	0.0123015	0.207976	-0.0146854	0.134087	-0.0321581
2.3	2.91209	1.14211	-0.150005	0.0622498	0.146389	0.175817	0.119689	-0.0180899	0.264858
2.4	3.53588	-1.23936	2.97512	0.181939	0.128299	0.440676	-0.113467	0.0190652	-0.334345
2.5	0.665724	-0.896388	0.906387	0.0684719	0.147364	0.106331	0.0256319	0.0327274	-0.0519982
2.6	2.57692	1.77547	0.406844	0.0941038	0.180091	0.054333	-0.0480997	-0.0207254	0.252314
2.7	1.6665	-2.878	-0.483048	0.0460041	0.159366	0.306646	-0.142485	0.0747322	-0.0434215
2.8	3.13892	0.328575	-2.35925	-0.0964809	0.234098	0.263225	-0.210723	-0.209438	0.101291
2.9	1.23244	-2.93715	0.321968	-0.307204	0.0246601	0.364516	-0.114477	-0.0381865	-0.0250213
3	0.321862	2.1305	-0.978536	-0.42168	-0.0135264	0.339495	-0.00953969	0.0141784	0.027275
3.1	0.846344	-3.03626	-1.99462	-0.43122	0.00065197	0.36677	0.034613	0.0767186	-0.00889827
3.2	1.45236	1.30234	2.41626	-0.396607	0.0773705	0.357872	-0.0288262	0.0255559	0.140033
3.3	0.280439	-0.338091	0.668287	-0.425433	0.102926	0.497905	0.0207651	0.0163934	-0.00930178
3.4	4.59848	2.35726	1.35409	-0.404668	0.11932	0.488603	-0.0699903	-0.317894	0.324815
3.5	4.85144	1.54608	2.40839	-0.474658	-0.198575	0.813419	-0.00890874	0.00802415	0.484995
3.6	2.40428	-0.899223	-1.81922	-0.483567	-0.19055	1.29841	-0.0367827	-0.145006	-0.188217
3.7	3.59589	-1.67585	1.88212	-0.52035	-0.335556	1.1102	0.0115502	-0.0358937	-0.357606
3.8	0.14866	-1.33828	2.17446	-0.5088	-0.37145	0.752591	-0.00194454	0.00282011	-0.0144659
3.9	0.914004	2.78134	0.173635	-0.510744	-0.36863	0.738125	-0.0842471	-0.0147771	0.0322193
4	4.07029	1.7246	-1.78017	-0.594991	-0.383407	0.770344	0.0129606	0.0609954	0.402224
4.1	3.43836	2.59061	-0.93445	-0.582031	-0.322412	1.17257	-0.17409	0.235613	0.180007
4.2	2.83515	-1.86445	0.45761	-0.75612	-0.0867987	1.35258	-0.0736199	-0.036256	-0.271379
4.3	0.0339756	-0.547405	1.94511	-0.82974	-0.123055	1.0812	-0.00106074	0.00270022	-0.00176834
4.4	2.88399	-2.72932	1.35769	-0.830801	-0.120354	1.07943	-0.0558841	-0.258258	-0.115559
4.5	3.34719	2.35912	2.47855	-0.886685	-0.378613	0.963869	0.18708	-0.146109	0.235987
4.6	3.57096	-0.510993	1.862	-0.699606	-0.524721	1.19986	-0.0894271	0.298367	-0.174636
4.7	1.35846	-0.428869	2.94006	-0.789033	-0.226355	1.02522	-0.121043	0.0247301	-0.0564904
4.8	0.371933	2.3206	-2.62729	-0.910075	-0.201624	0.968731	0.0220679	0.0124689	0.027219
4.9	1.92822	1.02985	-2.49311	-0.888007	-0.189156	0.99595	-0.0791363	-0.0599709	0.165292
5	2.15692	0.673556	0.20962	-0.967144	-0.249126	1.16124	0.164896	0.0350808	0.134542
5.1	1.28592	-2.27941	2.84574	-0.802247	-0.214046	1.29578	0.0800493	-0.0243991	-0.0976349
5.2	1.96345	-0.424357	1.73748	-0.722198	-0.238445	1.19815	-0.029686	0.17645	-0.0808419
5.3	3.22067	0.372027	1.98283	-0.751884	-0.0619949	1.11731	-0.120156	0.274925	0.117073
5.4	3.95685	-1.91725	1.3956	-0.87204	0.21293	1.23438	-0.0234183	-0.132302	-0.372175
5.5	0.683805	1.2194	-0.709022	-0.895459	0.0806277	0.862205	0.0178649	-0.0153251	0.0642019
5.6	1.86794	-2.87091	1.41758	-0.877594	0.0653026	0.926407	-0.02747	-0.177884	-0.0499465
5.7	2.86954	-2.55578	1.48868	-0.905064	-0.112581	0.87646	-0.0196124	-0.238302	-0.15865
5.8	2.14905	-0.79104	-0.0758874	-0.924676	-0.350883	0.71781	0.150666	-0.0114556	-0.152815
5.9	0.0152866	0.332549	0.113081	-0.77401	-0.362339	0.564995	0.00143568	0.000163044	0.000499035
6	0.178085	-1.52723	-1.45353	-0.772575	-0.362176	0.565494	9.0736e-05	-0.000770205	-0.0177916
6.1	4.04835	-0.746844	-0.780936	-0.772484	-0.362946	0.547702	0.211004	-0.20913	-0.275015
6.2	4.11499	-1.32468	2.9784	-0.56148	-0.572076	0.272687	-0.0989257	0.0162887	-0.399099
6.3	3.34455	2.37152	1.29272	-0.660405	-0.555787	-0.126412	-0.0659059	-0.230869	0.232843
6.4	2.33559	-1.73498	2.57089	-0.726311	-0.786656	0.106431	0.0321247	-0.0206228	-0.230418
6.5	2.53637	1.89842	0.156018	-0.694187	-0.807279	-0.123987	-0.0806288	-0.0126826	0.240146
6.6	1.98695	0.749883	-2.95835	-0.774815	-0.819962	0.116159	-0.142964	-0.026494	0.135421
6.7	3.63262	1.10471	-2.15268	-0.91778	-0.846456	0.25158	-0.0897204	-0.13638	0.324515
6.8	3.64767	-2.0519	-1.04864	-1.0075	-0.982836	0.576095	-0.0841882	0.146307	-0.32336
6.9	3.90064	1.42492	1.0659	-1.09169	-0.836529	0.252735	0.0274272	0.0496266	0.385921
7	2.27145	-3.07758	2.35531	-1.06426	-0.786902	0.638656	0.160146	-0.160428	-0.0145299
7.1	1.42771	-0.900339	-1.82824	-0.904116	-0.94733	0.624126	-0.0225864	-0.0857862	-0.111866
7.2	1.03941	1.53986	-0.954907	-0.926702	-1.03312	0.51226	0.00185751	-0.00262463	0.103892
7.3	1.77574	2.40939	2.39786	-0.924845	-1.03574	0.616152	0.0971903	-0.0894117	0.11871
7.4	1.83209	-3.11122	-0.0128831	-0.827654	-1.12515	0.734861	-0.183109	0.00235914	-0.00556442
7.5	4.61749	-2.59772	0.97424	-1.01076	-1.12279	0.729297	-0.22198	-0.326877	-0.238933
7.6	0.20412	-0.917339	0.526676	-1.23274	-1.44967	0.490364	0.0107275	0.00623762	-0.0162068
7.7	1.51518	2.25636	1.17961	-1.22202	-1.44343	0.474157	-0.0365754	-0.0886813	0.117284
7.8	3.59222	-0.437035	-3.0188	-1.25859	-1.53211	0.591441	-0.323008	-0.0398628	-0.152042
7.9	2.12393	1.61167	1.3973	-1.5816	-1.57198	0.439399	-0.00149808	-0.00854776	0.212215
8	4.68401	-2.19028	0.533708	-1.5831	-1.58052	0.651614	-0.234138	-0.138354	-0.381362
8.1	1.86047	2.79489	-1.60697	-1.81724	-1.71888	0.270252	0.00632901	0.174862	0.0632193
8.2	0.88145	-0.647271	-1.19227	-1.81091	-1.54402	0.333471	0.0259857	-0.0653384	-0.0531524
8.3	4.31319	-1.36903	-0.115559	-1.78492	-1.60935	0.280319	0.0858583	-0.00996608	-0.422569
8.4	2.00883	0.944154	1.93613	-1.69906	-1.61932	-0.142251	-0.0420868	0.110029	0.162716
8.5	0.386798	1.19657	0.917361	-1.74115	-1.50929	0.0204652	0.00859568	0.0112268	0.0360027
8.6	2.28015	-1.44468	1.85739	-1.73255	-1.49807	0.0564679	-0.00810738	0.0275102	-0.226204
8.7	3.92108	0.562421	-1.2367	-1.74066	-1.47055	-0.169736	0.108772	-0.313369	0.209086
8.8	0.682065	-2.51092	-1.88008	-1.63189	-1.78392	0.0393505	0.0167669	0.0524719	-0.0402206
8.9	4.54758	-0.590022	-2.58323	-1.61512	-1.73145	-0.000870191	-0.320481	-0.200197	-0.253018
9	2.92294	3.0357	-2.20964	-1.9356	-1.93165	-0.253888	0.173309	0.233335	0.0308941
9.1	4.48843	0.604188	2.8768	-1.76229	-1.69831	-0.222994	-0.356508	0.0966705	0.254985
9.2	4.24659	1.75734	-0.259267	-2.1188	-1.60164	0.0319914	-0.0761279	0.020192	0.417292
9.3	4.17378	-2.7297	-2.56138	-2.19493	-1.58145	0.449283	0.319879	0.20967	-0.167094
9.4	3.30302	-0.467856	-1.60955	-1.87505	-1.37178	0.282189	-0.0114209	-0.294585	-0.148957
9.5	2.27882	-0.278677	-2.82902	-1.88647	-1.66637	0.133232	-0.208475	-0.0673726	-0.0626868
9.6	2.87877	2.89158	-2.32129	-2.09495	-1.73374	0.0705452	0.190228	0.203993	0.0712264
9.7	3.66536	1.73675	1.94616	-1.90472	-1.52975	0.141772	0.0221979	-0.0563332	0.3615
9.8	3.487	-3.12677	-0.336827	-1.88252	-1.58608	0.503272	-0.32907	0.115231	-0.00516781
9.9	2.93324	-3.01128	0.0235482	-2.21159	-1.47085	0.498104	-0.290761	-0.00685079	-0.038116
0	2.80427	2.3541	0.109178	0	0	0	-0.196698	-0.0215609	0.198706
0.1	1.71809	-0.0897976	1.81811	-0.196698	-0.0215609	0.198706	-0.0418889	0.16591	-0.0154073
0.2	2.5056	2.37771	2.92649	-0.238587	0.144349	0.183299	0.176774	-0.0386213	0.173319
0.3	4.17847	0.678166	1.15456	-0.0618132	0.105728	0.356618	0.13156	0.297606	0.262143
0.4	2.18944	-1.92932	2.25258	0.0697468	0.403334	0.618761	0.0484134	-0.0596512	-0.205023
0.5	0.442309	1.51543	1.65235	0.11816	0.343683	0.413738	-0.000199405	0.00243953	0.0441631
0.6	0.466978	0.205478	-0.861323	0.117961	0.346122	0.457901	0.0297806	-0.0346846	0.00952798
0.7	1.51601	-1.54119	-1.84673	0.147741	0.311438	0.467429	-0.00122269	-0.00431808	-0.151535
0.8	4.7426	1.83824	-2.82667	0.146519	0.307119	0.315894	0.119166	0.03882	0.4574
0.9	4.79262	-0.43774	0.114147	0.265685	0.345939	0.773294	0.431249	0.0494405	-0.203156
1	3.79632	2.57088	-1.59308	0.696934	0.39538	0.570138	0.00711954	0.319388	0.205088
1.1	1.29419	2.49518	0.769721	0.704053	0.714768	0.775226	-0.0741865	-0.0718961	0.0779523
1.2	3.05395	2.2658	2.54849	0.629867	0.642872	0.853178	0.16217	-0.109311	0.234559
1.3	1.84389	-1.03443	0.00667271	0.792036	0.533561	1.08774	0.0942235	0.000628736	-0.158496
1.4	2.34347	2.30591	-2.17425	0.88626	0.534189	0.929242	0.0891926	0.129411	0.173828
1.5	2.65434	2.79868	-1.18287	0.975452	0.6636	1.10307	-0.0945604	0.231406	0.0892466
1.6	1.1851	1.89035	-3.03099	0.880892	0.895006	1.19232	0.0370021	0.00410928	0.11251
1.7	4.65427	0.477524	-1.41629	0.917894	0.899116	1.30483	0.0636136	-0.408438	0.213902
1.8	4.78693	-0.975007	2.10625	0.981508	0.490678	1.51873	-0.13706	0.231027	-0.396217
1.9	0.760557	-2.00629	1.06496	0.844448	0.721705	1.12251	-0.0155462	-0.0280668	-0.0689568
2	2.03858	-2.61043	2.35606	0.828902	0.693638	1.05355	0.124271	-0.124305	-0.103262
2.1	1.28565	-2.29752	1.79957	0.953173	0.569333	0.950293	0.0193718	-0.0831958	-0.0960842
2.2	3.51615	-2.18238	2.22918	0.972545	0.486138	0.854209	0.123521	-0.159686	-0.287882
2.3	0.342831	-2.53782	0.455142	1.09607	0.326451	0.566326	-0.0253489	-0.0124061	-0.0194643
2.4	3.87777	-2.43976	-2.71035	1.07072	0.314045	0.546862	0.269017	0.123783	-0.250357
2.5	0.831387	3.08755	0.0356675	1.33973	0.437828	0.296505	-0.0829645	-0.00296039	0.00449109
2.6	0.477744	1.19911	0.56813	1.25677	0.434868	0.300996	0.0146255	0.00933592	0.0445122
2.7	0.533466	1.53236	-0.0234636	1.27139	0.444204	0.345508	0.00204954	-4.80985e-05	0.0533072
2.8	3.12171	-1.22024	0.384106	1.27344	0.444156	0.398816	0.0993956	0.0401738	-0.293185
2.9	0.0788359	-0.803913	2.76151	1.37284	0.48433	0.10563	-0.00507998	0.00202949	-0.00567679
3	3.81776	-0.749429	0.272015	1.36776	0.486359	0.0999536	0.269213	0.0750912	-0.260074
3.1	3.30455	1.18954	1.21703	1.63697	0.56145	-0.16012	0.0425968	0.115343	0.306728
3.2	1.06468	-2.21091	1.59918	1.67957	0.676793	0.146608	0.00180479	-0.0635659	-0.0853906
3.3	0.859116	-0.53559	3.0876	1.68138	0.613227	0.0612176	-0.0737735	0.00398692	-0.0438448
3.4	0.631465	2.10693	1.80102	1.6076	0.617214	0.0173728	0.00736084	-0.0314052	0.0542863
3.5	1.41059	-0.698508	0.911744	1.61496	0.585809	0.0716592	0.06615	0.0854002	-0.0907115
3.6	0.00225189	1.75941	-0.889428	1.68111	0.671209	-0.0190524	-2.65937e-05	3.27942e-05	0.000221195
3.7	3.08293	0.837855	1.27384	1.68109	0.671242	-0.0188312	0.0603553	0.197238	0.229127
3.8	3.33867	-2.77733	1.78752	1.74144	0.86848	0.210296	0.0670798	-0.304663	-0.118944
3.9	1.02913	-3.03565	0.640971	1.80852	0.563817	0.0913515	-0.0820239	-0.0611944	-0.0108827
4	1.28581	-2.48466	1.45816	1.7265	0.502623	0.0804688	-0.0114448	-0.101174	-0.0785227
4.1	3.32147	2.4346	1.97452	1.71505	0.401449	0.00194611	0.099207	-0.232235	0.215746
4.2	4.38988	0.151422	2.51864	1.81426	0.169214	0.217692	-0.35245	0.253189	0.0662186
4.3	4.3942	-1.7891	2.445	1.46181	0.422403	0.283911	0.0729968	-0.0610607	-0.428991
4.4	1.13439	-1.98436	-2.0927	1.53481	0.361342	-0.14508	0.0227272	0.0395196	-0.103876
4.5	3.14966	-2.43595	1.76325	1.55753	0.400862	-0.248956	0.0458575	-0.235325	-0.204262
4.6	3.9502	-0.392665	-2.47317	1.60339	0.165537	-0.453218	-0.286418	-0.226181	-0.151155
4.7	0.472822	-1.05516	-3.10282	1.31697	-0.0606441	-0.604373	-0.0232968	-0.000903651	-0.0411345
4.8	2.89626	2.21328	-0.685799	1.29368	-0.0615477	-0.645507	-0.134304	0.109901	0.231878
4.9	0.101789	1.13025	0.262271	1.15937	0.0483529	-0.413629	0.00419217	0.00112541	0.00920705
5	2.81791	0.171317	-2.63175	1.16356	0.0494784	-0.404422	-0.242353	-0.135512	0.0480398
5.1	3.62884	2.09374	0.667377	0.921211	-0.0860336	-0.356383	-0.142352	-0.112172	0.314386
5.2	0.812099	-0.175422	2.01331	0.778859	-0.198206	-0.0419969	-0.0342411	0.0722615	-0.0141731
5.3	3.74977	-2.76733	3.13783	0.744618	-0.125944	-0.05617	0.349017	-0.00131332	-0.137087
5.4	3.64046	2.55622	-2.48444	1.09364	-0.127258	-0.193257	0.24024	0.185357	0.201139
5.5	3.58686	1.63635	-0.206351	1.33388	0.0580996	0.00788226	-0.0229983	0.00481424	0.357916
5.6	1.16035	2.28011	-1.39157	1.31088	0.0629139	0.365798	-0.0134726	0.0743643	0.0880486
5.7	0.227978	1.68011	-3.01871	1.2974	0.137278	0.453847	0.0024684	0.000304855	0.0226617
5.8	0.670539	-0.71728	-0.134128	1.29987	0.137583	0.476509	0.0500777	-0.00675741	-0.0440771
5.9	4.77363	-2.70335	-1.27426	1.34995	0.130826	0.432431	-0.126309	0.413384	-0.202571
6	1.47585	-2.28273	0.87565	1.22364	0.54421	0.229861	-0.0617548	-0.0740442	-0.111736
6.1	3.00693	-2.6466	-3.11907	1.16189	0.470166	0.118124	0.264534	0.00595973	-0.142837
6.2	1.95276	0.857282	2.49619	1.42642	0.476126	-0.0247127	-0.1021	0.0768789	0.147642
6.3	4.80881	-1.67387	-1.69779	1.32432	0.553004	0.122929	0.00626672	0.0490803	-0.478329
6.4	2.66731	2.23988	-1.36672	1.33059	0.602085	-0.3554	-0.033529	0.162012	0.20922
6.5	4.08465	-3.09153	-2.25689	1.29706	0.764097	-0.14618	0.258445	0.315645	-0.0204392
6.6	1.6915	1.5542	-0.19752	1.5555	1.07974	-0.166619	0.00275189	-0.000550734	0.169127
6.7	0.721689	2.1496	0.355241	1.55826	1.07919	0.00250814	-0.0370131	-0.0137311	0.0604138
6.8	4.6707	-2.86681	1.68911	1.52124	1.06546	0.062922	0.0530644	-0.446404	-0.126735
6.9	2.07157	-1.86801	0.271097	1.57431	0.619057	-0.0638128	-0.0584517	-0.016246	-0.198074
7	3.72367	-1.94611	-0.456504	1.51586	0.60281	-0.261887	-0.12252	0.0601697	-0.346448
7.1	3.12577	0.868137	-2.2677	1.39334	0.66298	-0.608335	-0.129655	-0.154903	0.238536
7.2	4.70141	-2.95418	-3.13209	1.26368	0.508077	-0.369799	0.461887	0.00438762	-0.087597
7.3	2.6625	0.372553	1.42618	1.72557	0.512465	-0.457396	0.035738	0.245397	0.0969136
7.4	0.910186	-0.409764	0.602147	1.76131	0.757862	-0.360482	0.0688006	0.0472862	-0.0362612
7.5	0.078099	3.07276	0.852255	1.83011	0.805148	-0.396744	-0.00512898	-0.00586512	0.000537158
7.6	3.53242	0.173086	0.801309	1.82498	0.799283	-0.396206	0.242102	0.249931	0.0608364
7.7	0.217364	-2.86739	-2.36002	2.06708	1.04921	-0.33537	0.0148522	0.0147391	-0.00588576
7.8	3.99805	0.676783	2.38275	2.08193	1.06395	-0.341256	-0.226168	0.214465	0.250393
7.9	3.25928	-1.25845	0.162321	1.85576	1.27842	-0.0908626	0.0988394	0.0161861	-0.310158
8	0.0569885	-3.11491	-2.76056	1.9546	1.2946	-0.401021	0.00528825	0.00211854	-0.00015205
8.1	3.93908	-1.15019	-0.564972	1.95989	1.29672	-0.401173	0.135843	-0.0861106	-0.359577
8.2	3.14693	-1.50273	-1.95192	2.09573	1.21061	-0.760749	-0.00796158	-0.0198685	-0.313965
8.3	1.92973	-0.490686	0.815432	2.08777	1.19074	-1.07471	0.116684	0.123912	-0.0909348
8.4	4.3119	-0.188985	0.557067	2.20446	1.31466	-1.16565	0.359481	0.22391	-0.0810042
8.5	2.78677	-1.72766	0.535563	2.56394	1.53857	-1.24665	-0.0374389	-0.0222168	-0.275255
8.6	2.20284	-1.67656	-1.2698	2.5265	1.51635	-1.52191	-0.00689417	0.0222086	-0.219053
8.7	4.405	-0.148509	1.8527	2.5196	1.53856	-1.74096	-0.121193	0.418455	-0.0651778
8.8	4.15873	1.68475	1.20937	2.39841	1.95701	-1.80614	-0.0167217	-0.0442338	0.413176
8.9	3.08545	-0.490001	3.07925	2.38169	1.91278	-1.39296	-0.27171	0.0169609	-0.145209
9	2.78568	2.8917	0.5949	2.10998	1.92974	-1.53817	-0.223545	-0.151268	0.0688901
9.1	2.18387	1.18923	-2.20945	1.88644	1.77847	-1.46928	-0.0484776	-0.0652939	0.202681
9.2	2.00159	2.24353	0.55231	1.83796	1.71318	-1.2666	-0.10618	-0.0654378	0.156548
9.3	2.31336	2.29171	1.01929	1.73178	1.64774	-1.11005	-0.0800093	-0.130058	0.173781
9.4	3.8046	1.37637	2.57451	1.65177	1.51768	-0.936273	-0.0620015	0.039486	0.373291
9.5	4.63581	-1.93431	1.00316	1.58977	1.55717	-0.562982	-0.0886203	-0.138981	-0.433287
9.6	2.27789	-1.78357	-1.29179	1.50115	1.41819	-0.996269	-0.0132475	0.0462423	-0.222652
9.7	0.354519	-2.79694	-2.43913	1.4879	1.46443	-1.21892	0.0254675	0.0215586	-0.0119781
9.8	3.7684	-1.61213	-2.62101	1.51337	1.48599	-1.2309	0.0135091	0.00774525	-0.376518
9.9	4.80699	-0.0514514	2.15511	1.52688	1.49373	-1.60742	-0.264815	0.400417	-0.0247226
0	1.90699	-1.29429	-0.66137	0	0	0	0.0410835	-0.0319754	-0.183456
0.1	1.12902	-0.434068	2.18381	0.0410835	-0.0319754	-0.183456	-0.0589321	0.0837807	-0.0474826
0.2	0.734545	1.54555	-0.253769	-0.0178487	0.0518054	-0.230938	0.00179514	-0.000465588	0.0734311
0.3	3.49544	2.48919	0.790318	-0.0160535	0.0513398	-0.157507	-0.195435	-0.197368	0.212208
0.4	3.21524	1.99556	1.18987	-0.211489	-0.146028	0.0547005	-0.0492611	-0.123004	0.292952
0.5	1.48983	0.240742	-2.00141	-0.26075	-0.269032	0.347653	-0.0603956	-0.131478	0.035521
0.6	0.0491797	0.0833112	-2.76664	-0.321145	-0.400511	0.383174	-0.00456042	-0.00179485	0.000409248
0.7	1.0296	0.777751	-0.081046	-0.325706	-0.402306	0.383583	0.0731178	-0.00593891	0.0722451
0.8	4.15564	2.9833	0.850811	-0.252588	-0.408244	0.455828	-0.270586	-0.308521	0.0655081
0.9	0.0339386	-2.97657	0.399423	-0.523174	-0.716766	0.521336	-0.00308424	-0.0013019	-0.000557526
1	4.28137	-1.56524	-2.50682	-0.526259	-0.718068	0.520779	-0.00191532	-0.00141053	-0.42813
1.1	3.71363	2.72229	2.47885	-0.528174	-0.719478	0.0926489	0.267388	-0.2087	0.15119
1.2	2.73844	-2.07932	-1.21212	-0.260786	-0.928178	0.243839	-0.0468037	0.124847	-0.239192
1.3	4.97406	2.06381	-2.69837	-0.30759	-0.803331	0.00464614	0.212665	0.100957	0.438171
1.4	0.155714	2.50398	0.0352139	-0.0949248	-0.702374	0.442817	-0.0125041	-0.000440502	0.00926938
1.5	0.228223	-1.38795	1.45413	-0.107429	-0.702814	0.452087	0.000483028	0.00412154	-0.0224418
1.6	0.35339	-2.71336	0.524939	-0.106946	-0.698693	0.429645	-0.0278194	-0.0161113	-0.0146749
1.7	3.56562	-0.128741	0.948454	-0.134765	-0.714804	0.41497	0.206134	0.287314	-0.0457776
1.8	3.58085	-0.911266	-2.28371	0.0713688	-0.42749	0.369193	-0.143506	-0.165979	-0.282987
1.9	2.63102	-1.56948	-2.97552	-0.0721369	-0.593469	0.0862052	-0.000340881	-5.71364e-05	-0.263102
2	1.90022	-0.57245	-0.137885	-0.0724777	-0.593526	-0.176897	0.158212	-0.0219543	-0.102934
2.1	3.64113	1.72556	-2.92515	0.0857341	-0.61548	-0.27983	0.0548169	0.0120538	0.359762
2.2	0.672734	3.01363	-1.20982	0.140551	-0.603426	0.0799314	-0.0235662	0.0624231	0.00858512
2.3	3.40511	-1.17793	2.21018	0.116985	-0.541003	0.0885166	-0.0777861	0.104609	-0.314569
2.4	1.88654	-2.67061	3.09099	0.0391988	-0.436394	-0.226053	0.167898	-0.00850383	-0.0856044
2.5	1.3024	-2.94437	-2.87626	0.207097	-0.444898	-0.311657	0.123246	0.0334914	-0.0255202
2.6	1.06472	2.3007	-1.32117	0.330343	-0.411406	-0.337177	-0.0175388	0.0687951	0.0793473
2.7	3.8813	2.39501	-0.116045	0.312804	-0.342611	-0.25783	-0.282977	0.0329862	0.263592
2.8	4.14034	1.47223	1.50576	0.0298273	-0.309625	0.00576267	0.00264824	0.0406595	0.412024
2.9	1.50302	2.28083	-2.34875	0.0324755	-0.268966	0.417787	0.0687614	0.0697933	0.11398
3	2.61014	0.891806	2.6897	0.101237	-0.199172	0.531767	-0.147465	0.0715784	0.203123
3.1	3.70498	-0.0611888	-0.881262	-0.0462279	-0.127594	0.73489	0.235262	-0.28532	-0.0226562
3.2	0.0869528	0.0973899	-1.45379	0.189034	-0.412914	0.712234	0.00101027	-0.0085949	0.000845494
3.3	2.94565	1.41766	1.78447	0.190044	-0.421509	0.713079	-0.00952829	0.0439115	0.291117
3.4	3.92271	-0.982125	0.490962	0.180516	-0.377597	1.0042	0.192083	0.102692	-0.326244
3.5	3.19122	2.32345	-2.78664	0.372599	-0.274905	0.677953	0.204546	0.0758143	0.232921
3.6	2.30494	-2.60352	-3.00697	0.577145	-0.199091	0.910874	0.196135	0.0265648	-0.118123
3.7	3.75777	1.69517	1.64331	0.773279	-0.172526	0.792751	0.00337741	-0.0464953	0.372874
3.8	1.3067	-2.31383	-0.308446	0.776657	-0.219021	1.16562	-0.0842293	0.0268367	-0.0962286
3.9	2.74286	1.92452	0.823927	0.692427	-0.192184	1.0694	-0.0645445	-0.0697201	0.257306
4	0.548201	-0.449119	0.0663492	0.627883	-0.261905	1.3267	0.0492749	0.00327415	-0.0238014
4.1	2.25487	1.43242	-1.01076	0.677158	-0.25863	1.3029	0.0165225	-0.0263519	0.223332
4.2	2.96072	-0.408509	1.806	0.69368	-0.284982	1.52623	-0.0633206	0.264229	-0.117612
4.3	3.10511	-0.841344	-1.01383	0.63036	-0.0207537	1.40862	0.109393	-0.175667	-0.231498
4.4	4.03862	1.98521	2.36023	0.739753	-0.19642	1.17712	0.11545	-0.114523	0.369676
4.5	2.26516	1.57308	2.59408	0.855203	-0.310944	1.5468	0.000440803	-0.000268751	0.226515
4.6	2.28308	3.04763	0.417523	0.855644	-0.311212	1.77331	-0.207774	-0.0921697	0.0214215
4.7	0.481745	-1.73144	0.883865	0.64787	-0.403382	1.79473	-0.00488676	-0.00595809	-0.0475542
4.8	3.87755	-2.59209	0.440135	0.642983	-0.40934	1.74718	-0.299156	-0.140886	-0.202512
4.9	4.23361	1.54418	1.51947	0.343827	-0.550226	1.54467	0.000578103	0.011254	0.423211
5	2.7781	0.772645	1.49371	0.344405	-0.538972	1.96788	0.0153192	0.19834	0.19392
5.1	2.10457	2.11348	-1.05869	0.359724	-0.340633	2.1618	-0.0532586	0.0947441	0.18022
5.2	4.01918	-1.74473	2.65204	0.306466	-0.245888	2.34202	0.0613839	-0.0327065	-0.395854
5.3	0.684959	-2.37216	1.94645	0.36785	-0.278595	1.94617	0.018051	-0.0457699	-0.0476548
5.4	1.73861	0.907295	-2.24201	0.385901	-0.324365	1.89851	-0.0665957	-0.0838487	0.136975
5.5	3.44656	2.34291	-1.16162	0.319305	-0.408213	2.03549	-0.0956638	0.2206	0.246925
5.6	1.01576	-3.12342	-0.476469	0.223641	-0.187613	2.28241	-0.0902477	0.0465796	-0.0018454
5.7	2.05747	2.58544	-1.90569	0.133393	-0.141034	2.28057	0.0574307	0.165032	0.108618
5.8	3.79024	2.046	3.07386	0.190824	0.0239982	2.38918	0.173013	-0.011736	0.337028
5.9	0.619971	-0.0267449	-0.48514	0.363837	0.0122623	2.72621	0.0548236	-0.0289009	-0.00165791
6	3.81081	-2.4559	2.4414	0.418661	-0.0166386	2.72455	0.225552	-0.190054	-0.241305
6.1	3.33964	-0.285002	0.545991	0.644213	-0.206692	2.48325	0.273897	0.166421	-0.0938971
6.2	1.26189	-1.71298	3.13424	0.91811	-0.0402718	2.38935	0.0178813	-0.000131486	-0.124916
6.3	4.41126	1.83881	-1.60276	0.935991	-0.0404033	2.26444	0.00373306	0.116759	0.425377
6.4	0.166057	0.477788	3.05805	0.939724	0.0763555	2.68981	-0.0146947	0.00123052	0.00763559
6.5	4.66725	1.91419	2.65824	0.92503	0.077586	2.69745	0.139139	-0.0730315	0.439476
6.6	2.70784	0.139384	-1.57534	1.06417	0.00455446	3.13692	-0.00121972	-0.268155	0.037621
6.7	3.37229	-1.1358	3.1031	1.06295	-0.263601	3.17455	-0.142005	0.00546885	-0.305824
6.8	3.85193	-3.08374	-2.35717	0.920944	-0.258132	2.86872	0.272183	0.271651	-0.0222733
6.9	1.33656	-1.61668	2.47362	1.19313	0.0135187	2.84645	0.0048133	-0.00379752	-0.133516
7	0.484413	-2.24073	-2.09966	1.19794	0.00972119	2.71293	0.0151762	0.0259694	-0.0379715
7.1	3.81348	2.77276	2.96946	1.21312	0.0356906	2.67496	0.350445	-0.0609262	0.137485
7.2	1.25259	2.27291	-1.67847	1.56356	-0.0252356	2.81245	0.0086932	0.0804274	0.0956326
7.3	0.454251	-0.520176	2.83022	1.57226	0.0551917	2.90808	-0.0375214	0.0120759	-0.0225778
7.4	0.733491	-2.50268	-2.1908	1.53473	0.0672676	2.8855	0.0342117	0.0479216	-0.0437397
7.5	1.19499	1.25185	-1.53177	1.56895	0.115189	2.84176	0.00146184	-0.0374423	0.113472
7.6	4.83059	0.162748	-0.468476	1.57041	0.077747	2.95523	0.425317	-0.215232	0.0782703
7.7	0.0760039	1.31882	1.50017	1.99573	-0.137485	3.0335	0.000133725	0.00189022	0.00736037
7.8	2.49726	-3.03583	1.81308	1.99586	-0.135595	3.04086	0.0595791	-0.241078	-0.0263633
7.9	3.93879	-2.8013	0.136188	2.05544	-0.376672	3.0145	-0.367855	-0.0504093	-0.131464
8	2.75393	2.90552	-2.36601	1.68758	-0.427082	2.88304	0.191181	0.187463	0.0644093
8.1	0.492449	2.33408	-0.429235	1.87876	-0.239618	2.94745	-0.0309545	0.0141678	0.035583
8.2	2.47384	2.62702	2.33967	1.84781	-0.225451	2.98303	0.149738	-0.15477	0.121753
8.3	2.2764	3.09951	-1.48255	1.99755	-0.38022	3.10478	-0.0200454	0.226554	0.00957596
8.4	0.0299999	2.05673	2.50172	1.9775	-0.153666	3.11436	0.00112393	-0.00083659	0.00265271
8.5	1.43944	2.15999	-1.67493	1.97863	-0.154503	3.11701	0.00831464	0.0795553	0.119673
8.6	0.51778	0.129827	1.43055	1.98694	-0.0749478	3.23668	0.00717678	0.0508382	0.00670333
8.7	1.83988	-0.109347	-1.44179	1.99412	-0.0241096	3.24339	0.0235284	-0.181369	-0.0200784
8.8	4.71692	-0.890506	3.08426	2.01765	-0.205479	3.22331	-0.296215	0.0170013	-0.366688
8.9	4.51732	1.44562	-2.76969	1.72143	-0.188477	2.85662	-0.0525445	-0.020495	0.448197
9	1.77742	-0.74407	1.66285	1.66889	-0.208972	3.30482	-0.0120212	0.130215	-0.120383
9.1	3.72874	-0.442517	0.982455	1.65686	-0.0787575	3.18443	0.187005	0.280302	-0.15967
9.2	3.93438	-2.4072	2.36227	1.84387	0.201545	3.02476	0.207743	-0.205234	-0.263658
9.3	3.48898	0.474311	-2.66581	2.05161	-0.00368926	2.76111	-0.27591	-0.142166	0.159351
9.4	3.09244	-0.295538	-2.93644	1.7757	-0.145855	2.92046	-0.289633	-0.0602675	-0.0900687
9.5	3.99026	0.310955	-2.30586	1.48607	-0.206123	2.83039	-0.254766	-0.281798	0.122089
9.6	3.18165	2.81291	-0.362033	1.2313	-0.487921	2.95248	-0.281613	0.106654	0.102703
9.7	1.78653	2.46057	-3.01209	0.949691	-0.381267	3.05518	0.137639	0.0179256	0.112477
9.8	3.65841	1.97761	-2.07298	1.08733	-0.363341	3.16766	0.0696788	0.126886	0.335983
9.9	0.350586	1.46755	-2.42873	1.15701	-0.236455	3.50364	-0.00273302	-0.00236505	0.0348717
0	2.19125	-2.03558	-0.268045	0	0	0	-0.09471	0.0260125	-0.19588
0.1	2.11543	0.721666	1.3589	-0.09471	0.0260125	-0.19588	0.0333988	0.155255	0.139753
0.2	4.40185	0.862016	-1.9854	-0.0613112	0.181267	-0.0561268	-0.115419	-0.262245	0.334169
0.3	4.02388	1.0457	2.12566	-0.17673	-0.0809776	0.278043	-0.106268	0.171452	0.348177
0.4	2.18459	-0.228445	0.493747	-0.282999	0.0904743	0.62622	0.187369	0.100844	-0.049473
0.5	4.04831	0.632083	-2.9859	-0.0956292	0.191319	0.576747	-0.322666	-0.0506476	0.239185
0.6	2.87706	-0.729444	1.9896	-0.418295	0.140671	0.815932	-0.0872301	0.195959	-0.191743
0.7	1.62219	-1.43623	2.20687	-0.505525	0.33663	0.624189	-0.0129281	0.0175068	-0.160753
0.8	1.69362	-1.74254	2.10649	-0.518453	0.354137	0.463436	0.0147745	-0.0248899	-0.16687
0.9	1.83465	-1.65503	2.96379	-0.503679	0.329247	0.296566	0.0151932	-0.0027302	-0.182814
1	0.889704	-0.231157	-1.14179	-0.488486	0.326517	0.113751	0.0360247	-0.0787558	-0.0203834
1.1	1.05239	-1.4535	-2.60494	-0.452461	0.247761	0.0933679	-0.0105847	-0.00629677	-0.104516
1.2	4.15629	-1.55027	0.696149	-0.463046	0.241465	-0.011148	0.0065443	0.00546924	-0.415542
1.3	1.75977	3.10648	2.71094	-0.456501	0.246934	-0.42669	0.159811	-0.0734189	0.00617763
1.4	4.16104	-0.324328	1.8938	-0.29669	0.173515	-0.420512	-0.125191	0.374014	-0.1326
1.5	2.14538	-1.91548	3.00735	-0.421882	0.547529	-0.553112	0.0718405	-0.00970246	-0.20192
1.6	2.49664	0.241335	-3.04872	-0.350041	0.537826	-0.755032	-0.241384	-0.0224831	0.0596694
1.7	2.67562	-2.40949	-2.65917	-0.591425	0.515343	-0.695363	0.176292	0.0923237	-0.178848
1.8	3.94938	1.43867	2.01632	-0.415132	0.607667	-0.874211	-0.0224214	0.0469515	0.391496
1.9	4.61657	0.655613	2.99432	-0.437554	0.654619	-0.482715	-0.361982	0.0537003	0.281447
2	0.696988	2.86428	-1.88608	-0.799536	0.708319	-0.201268	0.0207866	0.0637317	0.0190817
2.1	4.77328	0.514355	-2.84282	-0.778749	0.772051	-0.182186	-0.397157	-0.12232	0.234832
2.2	0.582652	0.722636	1.42485	-1.17591	0.64973	0.0526461	0.00635573	0.0432381	0.0385345
2.3	3.33543	0.911184	2.78612	-1.16955	0.692968	0.0911806	-0.19162	0.0711372	0.263576
2.4	3.09676	-0.815514	1.35796	-1.36117	0.764105	0.354756	0.0448407	0.207491	-0.225468
2.5	1.16423	-1.32203	-3.02861	-1.31633	0.971596	0.129288	-0.028482	-0.00323172	-0.112839
2.6	2.34295	-2.35716	-2.40604	-1.34481	0.968365	0.016449	0.122957	0.111273	-0.165512
2.7	4.15792	-2.8973	1.86054	-1.22185	1.07964	-0.149063	0.115265	-0.38663	-0.100569
2.8	4.29664	2.50749	-0.242878	-1.10659	0.693007	-0.249632	-0.335979	0.0832451	0.254558
2.9	0.828026	1.17438	2.99104	-1.44257	0.776252	0.00492559	-0.0316099	0.00479519	0.0763812
3	4.22776	-2.67206	-2.03953	-1.47418	0.781047	0.0813068	0.170323	0.336358	-0.191293
3.1	1.39469	-0.679131	-1.14625	-1.30386	1.11741	-0.109986	0.044702	-0.0988891	-0.0876029
3.2	1.60681	0.216089	-1.88194	-1.25915	1.01852	-0.197589	-0.0480473	-0.149408	0.0344517
3.3	4.61367	-1.36194	-1.5843	-1.3072	0.869108	-0.163137	-0.00129136	-0.0956506	-0.451342
3.4	2.51939	-0.159393	-1.49771	-1.30849	0.773457	-0.614479	0.018163	-0.248081	-0.0399876
3.5	1.06418	0.143702	-3.12187	-1.29033	0.525376	-0.654467	-0.105301	-0.00207713	0.01524
3.6	1.52787	-1.88782	0.965427	-1.39563	0.523299	-0.639227	-0.0271043	-0.0391652	-0.145173
3.7	0.605927	-2.4394	1.64883	-1.42273	0.484133	-0.7844	0.00360612	-0.0461176	-0.0391362
3.8	1.77565	2.05265	-2.75334	-1.41913	0.438016	-0.823536	0.0761636	0.0311518	0.157347
3.9	3.2472	2.78844	0.827805	-1.34296	0.469168	-0.666189	-0.206114	-0.224381	0.112308
4	1.3614	0.96699	1.94936	-1.54908	0.244786	-0.553881	-0.0285678	0.0718249	0.112068
4.1	4.52464	-2.64809	-2.3375	-1.57765	0.316611	-0.441814	0.276447	0.286983	-0.21434
4.2	1.29347	2.09733	-0.429591	-1.3012	0.603594	-0.656153	-0.0590955	0.0270732	0.111828
4.3	1.08109	1.15265	-1.07018	-1.36029	0.630667	-0.544325	0.0210703	-0.0385128	0.098795
4.4	2.34101	2.1861	-2.83094	-1.33922	0.592155	-0.44553	0.128656	0.0413051	0.191167
4.5	2.18239	2.61909	-1.28321	-1.21057	0.63346	-0.254363	-0.0536425	0.181353	0.108912
4.6	3.40887	1.3595	-0.638853	-1.26421	0.814813	-0.145452	0.0573922	-0.0426288	0.333306
4.7	0.143691	-1.93187	1.32906	-1.20682	0.772184	0.187854	-0.00121521	-0.00492867	-0.0134425
4.8	3.11326	-0.632041	1.99129	-1.20803	0.767255	0.174411	-0.102536	0.229304	-0.183929
4.9	3.30906	-1.89067	2.29616	-1.31057	0.996559	-0.00951727	0.0690281	-0.0778572	-0.314121
5	4.54345	0.940541	-1.29195	-1.24154	0.918702	-0.323638	0.0737025	-0.257426	0.367055
5.1	1.22653	-2.23815	1.151	-1.16784	0.661276	0.0434165	-0.0309397	-0.0693197	-0.0963389
5.2	0.998844	0.40833	0.390287	-1.19878	0.591956	-0.0529224	0.0847786	0.0348771	0.0396618
5.3	1.15667	1.01885	-2.66324	-1.114	0.626833	-0.0132606	-0.0538416	-0.0279177	0.098491
5.4	3.48281	2.8757	1.49331	-1.16784	0.598915	0.0852304	-0.0260137	-0.335034	0.0915169
5.5	1.66576	0.144512	2.22267	-1.19386	0.263882	0.176747	-0.100004	0.131039	0.0239885
5.6	0.467003	2.10118	-2.04515	-1.29386	0.394921	0.200736	0.0107906	0.0210155	0.0402843
5.7	2.71147	1.62194	-2.63696	-1.28307	0.415936	0.24102	0.0121325	0.00670122	0.270793
5.8	2.04619	1.57397	-3.1124	-1.27094	0.422638	0.511813	0.000648694	1.89439e-05	0.204618
5.9	2.5484	1.93335	1.55249	-1.27029	0.422657	0.71643	-0.00165407	-0.0903672	0.238274
6	4.06777	-2.02863	-1.51156	-1.27194	0.332289	0.954705	-0.0106449	0.179484	-0.364883
6.1	1.08461	1.60987	2.57486	-1.28259	0.511773	0.589821	0.00357418	-0.00227452	0.108378
6.2	2.25102	-2.44011	-0.328443	-1.27901	0.509498	0.6982	-0.162761	0.0554667	-0.145269
6.3	3.42384	2.69476	-1.48008	-1.44177	0.564965	0.55293	-0.0279705	0.307499	0.147949
6.4	0.568452	-1.13931	-2.90516	-1.46974	0.872464	0.700879	-0.0231125	-0.00556878	-0.051635
6.5	4.63782	-1.57535	-2.84557	-1.49286	0.866895	0.649244	0.00201974	0.000615987	-0.463777
6.6	4.55781	-1.04159	-2.55982	-1.49084	0.867511	0.185467	-0.192247	-0.126443	-0.393433
6.7	3.30094	-2.96072	-1.6954	-1.68308	0.741068	-0.207966	0.0403553	0.322191	-0.0593807
6.8	1.2847	1.97223	1.81683	-1.64273	1.06326	-0.267347	0.0122261	-0.0486861	0.118257
6.9	1.12735	2.25027	0.60322	-1.6305	1.01457	-0.14909	-0.0583384	-0.0401878	0.0876971
7	2.0021	2.04561	1.79318	-1.68884	0.974386	-0.0613927	0.0201875	-0.0892769	0.178062
7.1	1.46697	0.366159	2.91675	-1.66865	0.885109	0.11667	-0.133525	0.0305379	0.0525221
7.2	3.35039	2.99078	-2.70321	-1.80218	0.915647	0.169192	0.299914	0.140602	0.0503375
7.3	0.745199	0.594959	-0.274692	-1.50226	1.05625	0.219529	0.0594015	-0.0167403	0.0417666
7.4	1.30842	3.03158	1.08907	-1.44286	1.03951	0.261296	-0.0602544	-0.115251	0.0143656
7.5	3.46361	-0.480563	0.740568	-1.50312	0.924258	0.275661	0.226688	0.207223	-0.160115
7.6	0.614872	-1.05548	-2.4888	-1.27643	1.13148	0.115546	-0.0240714	-0.0184054	-0.0535022
7.7	1.00052	-0.988246	1.57766	-1.3005	1.11308	0.0620441	-0.00037777	0.0550427	-0.0835493
7.8	1.49536	-2.42317	-2.62451	-1.30088	1.16812	-0.0215052	0.0978601	0.0556526	-0.0984241
7.9	3.31665	-1.33873	-1.14706	-1.20302	1.22377	-0.119929	0.0313631	-0.0695325	-0.322774
8	2.4756	1.75038	1.65508	-1.17165	1.15424	-0.442703	0.00372243	-0.0440633	0.243578
8.1	3.05779	1.65676	-2.88961	-1.16793	1.11018	-0.199125	0.0254252	0.00654595	0.30465
8.2	3.01684	2.94738	0.0477465	-1.14251	1.11672	0.105525	-0.295675	-0.0141282	0.0582218
8.3	1.61128	2.03692	2.409	-1.43818	1.10259	0.163747	0.0538361	-0.0484308	0.143939
8.4	0.165	-2.56838	1.68755	-1.38435	1.05416	0.307685	0.00161488	-0.0137683	-0.00894855
8.5	3.67075	-0.232081	-2.33779	-1.38273	1.04039	0.298737	-0.247912	-0.257208	-0.0844286
8.6	3.43524	-0.717009	0.267453	-1.63064	0.783186	0.214308	0.249733	0.0684316	-0.225741
8.7	4.13941	-0.841278	-1.92286	-1.38091	0.851618	-0.0114325	-0.0951376	-0.258974	-0.308591
8.8	2.70332	2.91192	-0.00930394	-1.47605	0.592644	-0.320023	-0.263222	0.00244907	0.0615445
8.9	3.37442	-0.595185	-2.9318	-1.73927	0.595093	-0.258479	-0.27329	-0.0581916	-0.189191
9	3.83133	-2.02489	2.85899	-2.01256	0.536902	-0.44767	0.161393	-0.0468642	-0.344307
9.1	4.53911	1.02957	-0.376044	-1.85117	0.490038	-0.791976	0.21751	-0.0858801	0.389037
9.2	2.11094	1.74576	2.69786	-1.63366	0.404158	-0.402939	0.0331872	-0.0157756	0.207871
9.3	0.301287	-1.25139	3.03282	-1.60047	0.388382	-0.195069	-0.00940464	0.00102703	-0.0286048
9.4	4.16733	1.15333	1.82467	-1.60987	0.389409	-0.223673	-0.042436	0.163547	0.380944
9.5	3.70953	-2.88764	1.57518	-1.65231	0.552956	0.15727	0.00157376	-0.359052	-0.0931943
9.6	4.72159	-1.55633	-1.8508	-1.65074	0.193904	0.0640762	-0.00188715	-0.0065627	-0.47211
9.7	2.21851	2.12938	0.477231	-1.65262	0.187341	-0.408034	-0.104441	-0.0540061	0.188132
9.8	1.34849	-0.532237	-1.60328	-1.75706	0.133335	-0.219902	-0.00377376	-0.116135	-0.0684308
9.9	2.09121	0.878903	-2.38137	-1.76084	0.0172003	-0.288333	-0.0966814	-0.0919403	0.161033
0	3.1069	-0.672696	0.378082	0	0	0	0.225842	0.0897024	-0.19359
0.1	1.0534	0.878486	1.2039	0.225842	0.0897024	-0.19359	0.0241206	0.062765	0.0810878
0.2	3.38127	1.41066	0.471725	0.249963	0.152467	-0.112502	0.0480266	0.0245002	0.333801
0.3	3.02794	1.22738	0.00640665	0.29799	0.176968	0.221299	0.10195	0.000653166	0.285114
0.4	0.816987	2.54954	-2.73282	0.399939	0.177621	0.506413	0.0622077	0.0269464	0.0455935
0.5	4.38335	2.78286	1.65192	0.462147	0.204567	0.552006	0.0332596	-0.409082	0.153893
0.6	4.12385	0.848341	-3.01749	0.495407	-0.204515	0.7059	-0.270584	-0.0337542	0.309365
0.7	4.92373	-2.19941	-0.28198	0.224823	-0.238269	1.01526	-0.278092	0.0805631	-0.398253
0.8	3.35717	-0.162736	-2.42675	-0.0532695	-0.157706	0.617011	-0.250181	-0.217155	-0.0543925
0.9	3.70552	2.92971	0.380992	-0.303451	-0.374861	0.562619	-0.336289	-0.134705	0.0779288
1	4.03375	1.74632	0.70103	-0.63974	-0.509567	0.640548	-0.0538266	-0.0454323	0.397177
1.1	0.870238	1.23187	2.85816	-0.693566	-0.554999	1.03773	-0.0277785	0.00809109	0.0820734
1.2	1.62916	-2.98267	-0.343909	-0.721345	-0.546908	1.1198	-0.151443	0.054238	-0.0257824
1.3	3.87248	-1.94722	2.41716	-0.872788	-0.49267	1.09402	0.106603	-0.094337	-0.360136
1.4	0.349243	1.25946	-1.59786	-0.766185	-0.587007	0.733881	-0.000289446	-0.0106944	0.0332453
1.5	2.26916	-2.54981	2.23489	-0.766474	-0.597701	0.767126	0.116075	-0.148304	-0.126583
1.6	4.06506	3.11389	2.29458	-0.650399	-0.746006	0.640543	0.269094	-0.30448	0.0112601
1.7	3.28436	-0.639401	-2.54212	-0.381305	-1.05049	0.651803	-0.2176	-0.148699	-0.195983
1.8	2.25474	-2.55639	2.32545	-0.598905	-1.19918	0.45582	0.128755	-0.136927	-0.124545
1.9	1.49098	-2.76498	-0.484023	-0.47015	-1.33611	0.331275	-0.122722	0.0645193	-0.054835
2	2.05086	0.921938	1.33831	-0.592872	-1.27159	0.27644	0.0285525	0.120595	0.163407
2.1	0.162367	0.0136329	-0.840339	-0.564319	-1.151	0.439847	0.0108323	-0.0120931	0.000221346
2.2	2.43435	2.59823	-2.79565	-0.553487	-1.16309	0.440069	0.196029	0.0706552	0.125861
2.3	0.143671	-0.627011	-1.28668	-0.357458	-1.09244	0.56593	0.00326121	-0.0111678	-0.00842956
2.4	2.89363	1.92293	2.68028	-0.354197	-1.1036	0.5575	0.089369	-0.0444238	0.271608
2.5	0.18191	-0.853431	3.11615	-0.264828	-1.14803	0.829108	-0.0119549	0.00030428	-0.0137076
2.6	0.772003	1.29242	-0.162637	-0.276783	-1.14772	0.8154	0.0209342	-0.00343501	0.0742284
2.7	3.59314	2.86596	-1.35251	-0.255849	-1.15116	0.889628	-0.0748762	0.337546	0.0977896
2.8	3.07532	1.15714	0.449773	-0.330725	-0.813612	0.987418	0.111322	0.0537435	0.281593
2.9	4.70594	2.8724	-1.588	-0.219403	-0.759868	1.26901	0.00780185	0.453579	0.125156
3	3.73559	-1.80177	-1.76742	-0.211601	-0.306289	1.39417	0.0167063	0.0838686	-0.363639
3.1	1.1981	-1.22564	-1.66958	-0.194895	-0.22242	1.03053	-0.00399792	-0.0403397	-0.112744
3.2	2.35706	2.52762	-2.17439	-0.198893	-0.26276	0.917785	0.109354	0.158616	0.135794
3.3	3.54349	0.873036	-1.55579	-0.0895384	-0.104145	1.05358	0.00341706	-0.227645	0.271532
3.4	1.95875	1.22716	0.337393	-0.0861213	-0.331789	1.32511	0.0622724	0.0218456	0.184424
3.5	2.86362	-2.44716	-1.82989	-0.0238489	-0.309944	1.50953	0.0563754	0.2127	-0.183258
3.6	4.89169	1.04185	-0.720129	0.0325265	-0.0972436	1.32628	0.185558	-0.162789	0.42232
3.7	2.27503	-0.819176	0.28475	0.218085	-0.260033	1.7486	0.149089	0.043639	-0.16621
3.8	0.0286625	-2.60709	1.03416	0.367174	-0.216394	1.58239	-0.00126098	-0.00211976	-0.0014601
3.9	1.57871	0.150198	-2.23521	0.365913	-0.218514	1.58093	-0.0962466	-0.122889	0.0236229
4	0.424913	0.777143	0.048499	0.269666	-0.341403	1.60455	0.0302573	0.0014686	0.0297969
4.1	2.5265	-2.95422	1.36035	0.299924	-0.339935	1.63435	-0.051855	-0.242751	-0.0470622
4.2	1.06469	-2.59411	-2.24711	0.248069	-0.582686	1.58728	0.0569015	0.0708976	-0.0554211
4.3	1.28261	-0.660532	1.83755	0.30497	-0.511788	1.53186	-0.026698	0.0977011	-0.0786928
4.4	2.90705	-1.20983	-1.72271	0.278272	-0.414087	1.45317	-0.0155372	-0.101489	-0.27197
4.5	0.917577	0.312094	-0.193248	0.262735	-0.515576	1.1812	0.0856997	-0.0167706	0.0281744
4.6	4.38709	3.04865	-1.22121	0.348435	-0.532346	1.20937	-0.149615	0.410394	0.0407159
4.7	1.18435	-0.528417	-0.489322	0.19882	-0.121952	1.25009	0.0902783	-0.0480748	-0.0597108
4.8	3.90121	-1.38854	-2.55724	0.289099	-0.170027	1.19038	-0.0589775	-0.039008	-0.383659
4.9	0.976315	2.93485	2.32572	0.230121	-0.209035	0.806721	0.0654758	-0.0695929	0.0200414
5	2.51662	0.415667	-0.452146	0.295597	-0.278628	0.826762	0.207097	-0.100588	0.101621
5.1	3.53763	-2.7303	-1.95143	0.502694	-0.379216	0.928383	0.120466	0.301053	-0.141433
5.2	0.179224	-0.157904	-2.90162	0.623159	-0.0781629	0.78695	-0.0171922	-0.00420669	-0.00281827
5.3	1.3587	-0.0407894	1.97816	0.605967	-0.0823696	0.784132	-0.0537852	0.124647	-0.0055405
5.4	2.10028	-0.834118	1.60036	0.552182	0.0422778	0.778591	-0.00417138	0.141042	-0.155569
5.5	3.63786	2.68086	-2.5085	0.54801	0.18332	0.623023	0.262704	0.192788	0.16174
5.6	1.1897	1.00643	0.133897	0.810714	0.376108	0.784763	0.0630649	0.00849503	0.100521
5.7	3.04344	-1.24874	-1.61172	0.873779	0.384603	0.885284	-0.00394152	-0.0962499	-0.288697
5.8	3.98195	-0.939207	-2.58378	0.869838	0.288353	0.596587	-0.199467	-0.124448	-0.32138
5.9	3.87854	2.46972	-1.02271	0.67037	0.163905	0.275207	-0.158171	0.259093	0.24142
6	1.67887	2.39166	1.44785	0.512199	0.422997	0.516627	-0.0150663	-0.121922	0.11443
6.1	3.11607	1.30238	-2.01883	0.497133	0.301076	0.631057	-0.035799	-0.0744831	0.300449
6.2	1.63088	3.02915	-3.02573	0.461334	0.226593	0.931506	0.160971	0.018734	0.0182996
6.3	3.44924	-0.261407	0.272273	0.622305	0.245327	0.949806	0.320931	0.0896062	-0.0891422
6.4	4.64321	1.79756	-2.52881	0.943237	0.334933	0.860663	0.0853978	0.0600411	0.452434
6.5	1.63631	-2.25994	3.01596	1.02863	0.394974	1.3131	0.103229	-0.0130374	-0.126289
6.6	2.53807	2.65466	0.133894	1.13186	0.381937	1.18681	-0.2223	-0.0299439	0.11876
6.7	3.08192	3.1376	-0.0485636	0.909563	0.351993	1.30557	-0.307826	0.0149609	0.00122948
6.8	4.20009	3.06192	-3.07307	0.601737	0.366954	1.3068	0.417694	0.0286682	0.0334288
6.9	1.96555	-2.08043	1.22785	1.01943	0.395622	1.34023	-0.0322442	-0.0903065	-0.171578
7	1.7147	1.91904	-0.667803	0.987187	0.305315	1.16865	-0.0459442	0.0362355	0.161177
7.1	4.05563	-1.44066	-2.08321	0.941242	0.341551	1.32983	-0.0258039	-0.0458715	-0.402134
7.2	1.43483	-2.43044	-0.132771	0.915438	0.295679	0.927691	-0.107748	0.0143904	-0.0936522
7.3	3.55841	-0.978431	0.895523	0.807691	0.31007	0.834039	0.124194	0.155073	-0.295213
7.4	0.893299	-2.42463	1.04973	0.931885	0.465143	0.538826	-0.0335211	-0.058401	-0.0586983
7.5	3.73541	1.85879	0.535806	0.898363	0.406742	0.480127	-0.0912293	-0.0541667	0.358157
7.6	2.18415	-0.617067	-2.04907	0.807134	0.352575	0.838284	-0.0819861	-0.158146	-0.126385
7.7	1.72771	3.05994	1.26628	0.725148	0.194429	0.711899	-0.0516303	-0.164273	0.0140909
7.8	1.69302	-0.515105	-1.44932	0.673518	0.0301562	0.72599	0.0178529	-0.146248	-0.0834028
7.9	2.50823	0.802411	-0.516581	0.691371	-0.116092	0.642587	0.15157	-0.0860962	0.18035
8	0.875997	-1.23638	-1.29716	0.84294	-0.202188	0.822937	0.00776984	-0.0276823	-0.0827468
8.1	0.358439	2.48145	-2.5187	0.85071	-0.22987	0.74019	0.0229959	0.0165177	0.0219805
8.2	2.24626	-1.01631	-1.24338	0.873706	-0.213353	0.762171	0.038035	-0.111984	-0.19097
8.3	2.79206	0.867089	-2.29068	0.911741	-0.325337	0.571201	-0.119108	-0.135835	0.21288
8.4	3.8024	2.48071	-0.0609326	0.792633	-0.461172	0.784081	-0.299624	0.0182795	0.233396
8.5	1.1298	0.478811	1.82432	0.493009	-0.442893	1.01748	-0.0251501	0.097069	0.0520525
8.6	1.77884	-0.950375	-0.297298	0.467858	-0.345824	1.06953	0.0988813	-0.0302951	-0.144733
8.7	0.891108	-0.173127	0.456912	0.56674	-0.376119	0.924797	0.0787743	0.0387261	-0.0153506
8.8	2.84013	-0.0533949	1.8906	0.645514	-0.337393	0.909447	-0.0891619	0.269229	-0.0151577
8.9	2.76392	-2.9188	2.58719	0.556352	-0.068164	0.894289	0.229185	-0.141906	-0.0610696
9	3.15088	-2.31786	1.80507	0.785537	-0.21007	0.833219	0.0496997	-0.208251	-0.231175
9.1	0.937476	0.805519	-2.08212	0.835236	-0.418321	0.602045	-0.0317784	-0.0566362	0.0676098
9.2	4.37734	-2.68599	-0.496846	0.803458	-0.474957	0.669654	-0.345555	0.187365	-0.192606
9.3	0.596414	-0.47028	-0.796795	0.457903	-0.287592	0.477049	0.0371637	-0.0380206	-0.0270257
9.4	2.78632	-0.578034	0.0681789	0.495067	-0.325613	0.450023	0.232823	0.0158982	-0.152238
9.5	0.481972	1.166	-1.82048	0.727889	-0.309715	0.297785	-0.00469032	-0.018393	0.044302
9.6	2.41442	3.07003	-1.24091	0.723199	-0.328108	0.342087	-0.0780111	0.227839	0.0172635
9.7	2.50251	-3.05798	-0.237864	0.645188	-0.100269	0.35935	-0.242355	0.0587598	-0.0208999
9.8	3.23548	-2.07918	-1.86763	0.402833	-0.0415093	0.33845	0.0460646	0.150604	-0.282631
9.9	4.56729	-2.35172	-0.380708	0.448898	0.109095	0.0558198	-0.298487	0.119464	-0.3244
